# Supplementary material for: NEIVAv1.0: Next-generation Emissions InVentory expansion of Akagi et al. (2011) version 1.0
Source: Copernicus journal article supplement (doi:10.5194/gmd-17-7679-2024), 2024-11-04
Supplement: Supplementary file 1 [file gmd-17-7679-2024-supplement.zip]

## Sheet: Sheet1
mm	formula	compound	pollutant_category	AVG_savanna_g/kg	AVG_boreal_forest_g/kg	AVG_tropical_forest_g/kg	AVG_temperate_forest_g/kg	AVG_peat_g/kg	AVG_chaparral_g/kg	AVG_open_cooking_g/kg	AVG_cookstove_g/kg	AVG_dung_burning_g/kg	AVG_charcoal_making_g/kg	AVG_charcoal_burning_g/kg	AVG_pasture_maintenance_g/kg	AVG_crop_residue_g/kg	AVG_garbage_burning_g/kg	N_savanna	N_boreal_forest	N_tropical_forest	N_temperate_forest	N_peat	N_chaparral	N_open_cooking	N_cookstove	N_dung_burning	N_charcoal_making	N_charcoal_burning	N_pasture_maintenance	N_crop_residue	N_garbage_burning	STD_savanna	STD_boreal_forest	STD_tropical_forest	STD_temperate_forest	STD_peat	STD_chaparral	STD_open_cooking	STD_cookstove	STD_dung_burning	STD_charcoal_making	STD_charcoal_burning	STD_pasture_maintenance	STD_crop_residue	STD_garbage_burning	id
2	H2	Hydrogen	inorganic gas	1.7		3.355	2.03	1.217								2.072	0.091	1	0	2	1	1	0	0	0	0	0	0	0	1	1			0.629325												InChI=1S/H2/h1H
16.04	CH4	Methane	methane	2.82761	4.7837	4.68143	4.74441	11.0975	2.57192	4.85679	3.60419	6.98112	58.855	3.46465	8.832	2.14244	3.06297	8	10	7	16	8	5	9	15	14	6	4	3	16	6	1.60619	1.82122	2.03311	1.88502	4.59908	0.797745	2.71728	3.30229	3.00472	47.9995	1.87977	7.49596	1.12567	2.85156	InChI=1S/CH4/h1H4
17	NH3	Ammonia	inorganic gas	0.659215	1.47062	1.32667	1.06254	6.15172	0.909158	0.587397	2.25242	2.20003	8.89	0.435258	1.502	0.967769	0.688083	4	8	3	11	8	5	3	10	14	4	2	2	6	4	0.339266	1.32581	1.05836	0.673952	6.22873	0.344763	0.641729	6.6333	2.03591	16.4131	0.501681	0.195161	0.547933	0.424338	InChI=1S/H3N/h1H3
28	CO	Carbon monoxide	inorganic gas	80.95	100.48	110.761	95.9542	224.894	66.6	78.4	52.3462	94.8873	260.32	152.06	135.46	57.5424	52.03	7	11	7	19	10	6	12	17	16	6	7	3	19	6	24.1645	9.27258	57.2841	15.3185	37.1334	4.1415	19.2269	17.3262	11.4478	52.4708	43.5126	84.3172	13.4615	18.8971	InChI=1S/CO/c1-2
30	NO	Nitric oxide	inorganic gas	1.75537	0.915503	0.9	0.784574	0.320733	1.15189	1.33428	1.31851	2.06351	0.2535	2.91542	0.32	0.961612	0.809529	5	5	3	13	4	4	4	11	11	2	3	2	10	3	1.76244	0.758589	1.22233	0.734617	0.327617	0.955491	1.05894	0.965717	0.615897	0.277893	1.58341	0.0282843	0.694081	0.615529	InChI=1S/NO/c1-2
30	NOx	Nitrogen oxides(NOx as NO)	inorganic gas	3.40358	1.21003	2.55	1.65051	0.926616	2.42257	1.65342	1.68255	2.41685	0.221	1.409	0.682	2.0516	2.30548	5	6	5	14	2	5	6	10	12	3	1	3	10	5	1.92024	1.03332	1.4564	0.98053	0.73243	1.79272	0.979982	1.08996	0.873813	0.203034		0.395515	1.06689	1.50463	NOx_as_NO
34	H2S	Hydrogen sulfide	inorganic gas				0.0323225	0.2542	0.00549718			0.174762				0.0203178		0	0	0	1	1	1	0	0	1	0	0	0	1	0															InChI=1S/H2S/h1H2
34	H2O2	Hydrogen peroxide	inorganic gas	0.131			0.20675		0.379							0.08025		1	0	0	4	0	1	0	0	0	0	0	0	4	0				0.262214									0.0195683		InChI=1S/H2O2/c1-2/h1-2H
43	CHNO	Isocyanic acid	inorganic gas	1.05	0.083		0.404969	0.57403	0.302445			0.793804				0.469276	0.128685	1	1	0	9	1	2	0	0	1	0	0	0	5	1				0.255834		0.312463							0.206362		InChI=1S/CHNO/c2-1-3/h2H
44	N2O	Nitrous oxide	inorganic gas	0.14	0.205		0.155		0.25					0.132707				1	2	0	2	0	1	0	0	0	0	1	0	0	0		0.0919239		0.162635											InChI=1S/N2O/c1-2-3
44	CO2	Carbon dioxide	inorganic gas	1640.33	1609.8	1624.86	1581.13	1571.74	1649	1558.88	1587.81	1015.32	1686.43	2302.2	1544.67	1441.41	1502.33	7	11	7	19	10	6	12	17	16	6	7	3	19	5	87.7015	41.9295	89.8006	130.254	173.055	34.7505	89.2661	345.364	82.6707	331.71	100.154	182.954	56.8746	85.9079	InChI=1S/CO2/c2-1-3
46	NO2	Nitrogen dioxide	inorganic gas	2.59953	0.922032	3.55	1.40379	0.5425	1.02288	0.901965	0.616923	0.799957		0.377	0.54	1.95899	2.33795	3	4	1	13	2	4	4	10	11	0	1	2	9	4	1.64255	0.935308		0.8241	0.917436	1.0817	0.331265	0.467867	0.39567			0.551543	1.39717	3.02293	InChI=1S/NO2/c2-1-3
47	HNO2	Nitrous acid	inorganic gas	0.4988	0.255386	1.18	0.37817	0.222002	0.552335	0.422775	0.325363	0.242275		0.317954	0.167	0.352768	0.250977	2	2	1	12	3	4	3	10	12	0	1	1	8	3	0.196859	0.332886		0.157148	0.147973	0.22275	0.133788	0.234227	0.0898623				0.0890528	0.221742	InChI=1S/HNO2/c2-1-3/h(H,2,3)
48	HCl	Hydrochloric acid	inorganic gas	0.2363	0.0485543		0.0531899	0.02105	0.0871829	0.140214	0.0137264	0.0258301				0.260544	4.30001	1	1	0	5	2	3	1	2	8	0	0	0	4	5				0.0299144	0.0191626	0.0539509		0.00689235	0.0297401				0.313724	4.17705	InChI=1S/ClH/h1H
64	SO2	Sulfur dioxide	inorganic gas	0.94445	0.563768	0.403333	0.949778	2.0626	0.553344	0.502385		1.27079			0.44	1.24531	0.704607	4	2	3	9	2	4	1	0	2	0	0	1	8	3	0.604859	0.429592	0.171561	0.491083	0.597364	0.29948			1.70134				0.65186	0.185315	InChI=1S/O2S/c1-3-2
68	C3O2	Carbon suboxide	inorganic gas				0.00368976	0.00136728	0.00153038		0.00177586	0.000505822				0.000950454	0.000499194	0	0	0	6	1	2	0	1	1	0	0	0	1	1				0.00280171		0.000467228									InChI=1S/C3O2/c4-2-1-3-5
79	HNO4	Peroxynitric acid	inorganic gas		0.001													0	1	0	0	0	0	0	0	0	0	0	0	0	0															InChI=1S/HNO4/c2-1(3)5-4/h4H
93	NO2Cl	Nitryl chloride	inorganic gas	0.000103			0.0001666									0.000127267		1	0	0	3	0	0	0	0	0	0	0	0	3	0				0.000121163									5.93466e-05		InChI=1S/ClNO2/c1-3(2)4
106	C2H3O2Cl	Chloroacetic acid	inorganic gas	0.000267			0.000394									0.0001092		1	0	0	1	0	0	0	0	0	0	0	0	3	0													6.52984e-05		InChI=1S/C2H3ClO2/c3-1-2(4)5/h1H2,(H,4,5)
108	N2O5	Dinitrogen pentoxide	inorganic gas	0.000418			0.00038601									0.0001795		1	0	0	4	0	0	0	0	0	0	0	0	2	0				0.000416766									7.99031e-05		InChI=1S/N2O5/c3-1(4)7-2(5)6
201	Hg	Gaseous elemental mercury	inorganic gas		8.7e-05			0.00035										0	1	0	0	1	0	0	0	0	0	0	0	0	0															InChI=1S/Hg
26	C2H2	Acetylene	NMOC_g	0.353506	0.343655	0.438	0.332363	0.16848	0.3478	0.995376	0.637312	1.00936	0.39	0.368907	0.1825	0.236674	0.597836	7	9	5	16	7	6	5	14	14	2	2	2	9	4	0.275217	0.473422	0.398773	0.170596	0.176725	0.293324	0.579639	0.341466	0.694588	0.296985	0.0722565	0.159099	0.0972689	0.16605	InChI=1S/C2H2/c1-2/h1-2H
27	HCN	Hydrogen cyanide	NMOC_g	0.485282	0.926351	0.423333	0.493314	4.67994	0.268259	0.245283	0.300941	2.20864	0.21		0.4435	0.320567	0.302233	5	6	3	14	8	5	3	9	12	1	0	2	11	4	0.208335	0.616437	0.215019	0.310777	1.60522	0.274267	0.095208	0.217318	2.67565			0.132229	0.143622	0.18193	InChI=1S/CHN/c1-2/h1H
28	C2H4	Ethene	NMOC_g	1.20442	1.66154	1.058	1.36101	1.52646	0.964112	1.68033	1.19988	2.58744	4.47667	0.386836	1.27767	0.889144	2.06509	7	7	5	14	7	5	5	13	15	3	3	3	9	5	0.773413	1.28456	0.442911	0.561614	0.705733	0.633749	0.789268	0.857801	1.57186	1.59857	0.176009	0.127226	0.34119	1.15888	InChI=1S/C2H4/c1-2/h1-2H2
29	CH3N	Methanimine	NMOC_g				0.00104154	0.00011394	0.000383575			0.00429949				0.000846576		0	0	0	1	1	1	0	0	1	0	0	0	1	0															InChI=1S/CH3N/c1-2/h2H,1H2
30	C2H6	Ethane	NMOC_g	0.6135	0.958675	0.708	0.789193	2.5208	0.475	1.5	0.255706	0.843329	12.2	0.405	0.751	0.52423	1.69	4	6	5	14	3	3	1	4	6	1	2	2	6	1	0.516032	0.680716	0.40289	0.409531	1.21248	0.112583		0.171203	0.634609		0.304056	0.545886	0.165755		InChI=1S/C2H6/c1-2/h1-2H3
30	CH2O	Formaldehyde	NMOC_g	1.69761	1.67924	1.73	2.0364	1.34968	1.24934	2.11838	0.775767	1.56176	2.285	0.52191	1.896	1.74815	1.46076	5	7	3	15	7	5	5	12	12	2	2	2	10	4	1.23677	0.817803	1.01134	0.420261	0.432647	0.588194	1.22529	0.501749	0.597737	2.25567	0.110436	0.0226274	0.617288	0.70104	InChI=1S/CH2O/c1-2/h1H2
31	CH3O	Methanol	NMOC_g	1.20968	2.13803	2.43333	1.82683	3.69176	0.934277	2.0499	0.976264	2.00016	43.18	0.879807	6.587	1.69113	0.561612	5	7	3	15	7	5	5	13	15	3	2	2	11	4	0.501724	0.870382	1.25731	0.722448	2.17888	0.463634	1.06095	0.734119	1.09811	26.4355	0.184121	5.25097	1.08605	0.352426	InChI=1S/CH4O/c1-2/h2H,1H3
40	C3H4	1,2-Propadiene, propyne, other (unknown)	NMOC_g						0.0310457									0	0	0	0	0	1	0	0	0	0	0	0	0	0															40.03076_C3H4
40	C3H4	Propadiene	NMOC_g	0.0375	0.290908	0.01615	0.0203784	0.020841	0.009		0.0176067	0.0377289			0.01	0.0134054	0.0547	2	2	2	6	1	1	0	4	6	0	0	1	5	1	0.0360624	0.338127	7.07107e-05	0.017436				0.00431678	0.0173831				0.00634435		InChI=1S/C3H4/c1-3-2/h1-2H2
40	C3H4	Propyne	NMOC_g	0.186	0.029		0.112103	0.0648388	0.118089		0.0477557	0.0988373				0.0999685	0.100424	1	1	0	9	1	3	0	4	6	0	0	0	5	2				0.190408		0.147199		0.00966419	0.0375218				0.124091	0.0148831	InChI=1S/C3H4/c1-3-2/h1H,2H3
41	C2H3N	Acetonitrile	NMOC_g	0.234884	0.218412	0.41	0.209211	1.63804	0.0991646	0.0125562	0.0125819	0.580768			0.276	0.2181	0.0834695	3	4	1	14	4	4	1	2	1	0	0	1	13	2	0.128555	0.187363		0.174999	2.21332	0.0562466		0.0144449					0.190295	0.0723911	InChI=1S/C2H3N/c1-2-3/h1H3
42	C2H2O	Ketene fregments	NMOC_g	1.8747	1.54653		1.34942	1.42283	0.569882	0.813644	0.753178					1.27882	0.598035	1	1	0	1	1	1	1	2	0	0	0	0	1	1								0.349949							42.010040999999994_C2H2O
42	C3H6	Propene	NMOC_g	0.717369	0.826438	0.636	0.689995	1.85685	0.346511	0.518927	0.251777	1.13994	3.54667	0.725988	0.856	0.370406	1.39615	6	8	5	17	6	6	5	13	15	3	1	3	13	4	0.874345	0.328038	0.399912	0.425204	0.857228	0.14542	0.336793	0.226183	0.32243	1.61091		0.521908	0.167902	0.294658	InChI=1S/C3H6/c1-3-2/h3H,1H2,2H3
42	CH2N2	Cyanamide	NMOC_g		0.064													0	1	0	0	0	0	0	0	0	0	0	0	0	0															InChI=1S/CH2N2/c2-1-3/h2H2
43	C2H5N	Ethenamine	NMOC_g				0.0104015	0.0051273	0.0012816			0.0303493				0.0134394		0	0	0	2	1	1	0	0	1	0	0	0	1	0				0.00127061											InChI=1S/C2H5N/c1-2-3/h2H,1,3H2
44	C2H4O	Acetaldehyde	NMOC_g	2.44684	1.59541	1.55	1.55986	1.80925	0.914376	0.485127	0.387919	1.2293			1.202	2.10264	1.77291	3	2	1	13	4	4	1	7	7	0	0	1	9	3	1.58907	0.700621		0.62383	1.06947	0.788562		0.255505	0.659716				0.934932	0.423247	InChI=1S/C2H4O/c1-2-3/h2H,1H3
44	C3H8	Propane	NMOC_g	0.0966667	0.309668	0.126	0.299588	4.0644	0.416333		0.143057	0.323297			0.11	0.171139	0.904	3	5	3	12	2	3	0	4	6	0	0	1	6	1	0.0488808	0.137813	0.0760789	0.187615	4.34956	0.409463		0.107385	0.261792				0.0447272		InChI=1S/C3H8/c1-3-2/h3H2,1-2H3
45	CH3NO	Formamide	NMOC_g				0.0275473	0.0435251	0.00321581			0.0594341				0.0196829		0	0	0	2	1	1	0	0	1	0	0	0	1	0				0.0133682											InChI=1S/CH3NO/c2-1-3/h1H,(H2,2,3)
45	C2H7N	Ethylamine + dimethylamine	NMOC_g	0.0151	0.0161929		0.0317073	0.0011394	0.00581672	0.0305916	0.00951125	0.00598556				0.0382415	0.0136446	1	1	0	2	1	2	1	2	1	0	0	0	2	1				0.0442341		0.00802658		0.00954423					0.0533334		45.05726_C2H7N
46	C2H6O	Ethanol	NMOC_g	0.309	0.027		0.182304	0.336579	0.0326708		0.11966	0.19332				0.247219	0.097183	1	1	0	10	1	2	0	5	7	0	0	0	8	2				0.22718		0.0320025		0.115448	0.347581				0.291776	0.0138353	InChI=1S/C2H6O/c1-2-3/h3H,2H2,1H3
46	CH2O2	Formic acid	NMOC_g	0.382542	0.453044	0.7876	0.496578	0.413978	0.401797	0.25998	0.134922	0.258802	0.663633	0.0937778	0.18545	0.495995	0.256446	5	6	3	14	7	5	5	11	14	3	2	2	10	4	0.301905	0.18261	0.894085	0.360453	0.229052	0.614915	0.0989192	0.0858272	0.139805	0.0882185	0.0435264	0.0871863	0.220469	0.164948	InChI=1S/CH2O2/c2-1-3/h1H,(H,2,3)
48	CH4O2	Methane diol	NMOC_g				0.000747387	0.00079758	0.000208693			0.000590126				0.00116404		0	0	0	1	1	1	0	0	1	0	0	0	1	0															InChI=1S/CH4O2/c2-1-3/h2-3H,1H2
48	CH4S	Methane thiol	NMOC_g	0.02755	0.0209259		0.0185309	0.0491287	0.00513309	0.00593568	0.00271728	0.142979				0.0368399	0.00332796	2	2	0	5	2	2	1	2	1	0	0	0	4	1	0.0147785	0.0097947		0.0126692	0.0413828	0.00357582		0.000215159					0.0180242		InChI=1S/CH4S/c1-2/h2H,1H3
50	C4H2	1,3-Butadiyne	NMOC_g	0.00335	0.00755669		0.00323311	0.00148333	0.00530969	0.010045	0.00308961	0.0038				0.00133232	0.00349436	2	1	0	7	2	2	1	4	2	0	0	0	3	1	0.00233345			0.00300186	0.00167349	0.000693401		0.00200506	0.00325269				0.000688523		InChI=1S/C4H2/c1-3-4-2/h1-2H
50	CH6O2	Methanol hydrate	NMOC_g		0.028													0	1	0	0	0	0	0	0	0	0	0	0	0	0															InChI=1S/CH4O.H2O/c1-2;/h2H,1H3;1H2
51	C3HN	Propiolonitrile (=propyne nitrile)	NMOC_g				0.00169831	0.0017091	0.000796592			0.00261341				0.000317466		0	0	0	1	1	1	0	0	1	0	0	0	1	0															InChI=1S/C3HN/c1-2-3-4/h1H
52	C4H4	1-Buten-3-yne	NMOC_g	0.0564	0.0535845		0.0264068	0.0310325	0.0220729	0.0488552	0.0221962	0.0424957				0.0285858	0.0331132	2	2	0	10	2	4	1	4	3	0	0	0	5	1	0.0079196	0.050324		0.0229333	0.00348723	0.0170389		0.0112374	0.022224				0.0186817		InChI=1S/C4H4/c1-3-4-2/h1,4H,2H2
53	C3H3N	Acrylonitrile	NMOC_g	0.130112	0.0299945	0.04	0.0471305	0.0417299	0.0286158			0.0759576				0.037901	0.0117645	2	2	1	11	2	3	0	0	1	0	0	0	11	1	0.0719663	0.008493		0.036019	0.0329934	0.0202037							0.0230084		InChI=1S/C3H3N/c1-2-3-4/h2H,1H2
54	C3H2O	2-Propynal	NMOC_g	0.0688	0.0421334		0.0494836	0.0646561	0.0179411			0.038864				0.0290282		1	2	0	3	2	2	0	0	1	0	0	0	2	0		0.047282		0.0177392	0.0439026	0.00917166							0.012225		InChI=1S/C3H2O/c1-2-3-4/h1,3H
54	C4H6	2-Butyne	NMOC_g	0.005			0.00236058	0.0011			0.00491386	0.00749879				0.0024	0.0073	1	0	0	3	1	0	0	5	6	0	0	0	3	1				0.00118037				0.00562735	0.00428451				0.00052915		InChI=1S/C4H6/c1-3-4-2/h1-2H3
54	C4H6	1-Butyne	NMOC_g	0.016			0.00530458	0.002	0.0064		0.00758674	0.0108304				0.006875	0.0105	1	0	0	4	1	1	0	4	6	0	0	0	4	1				0.0010219				0.00571325	0.00436128				0.00370529		InChI=1S/C4H6/c1-3-4-2/h1H,4H2,2H3
54	C4H6	1,3-Butadiene	NMOC_g	0.171933	0.158496	0.039	0.212289	0.307452	0.113423	0.139218	0.146378	0.407259		0.21046		0.123285	0.29662	3	4	1	11	2	3	3	13	12	0	1	0	11	3	0.138156	0.155668		0.116652	0.0500632	0.0722077	0.103565	0.111204	0.169755				0.055984	0.127015	InChI=1S/C4H6/c1-3-4-2/h3-4H,1-2H2
54	C4H6	1,2-Butadiene	NMOC_g	0.012			0.00298152	0.000931449	0.00269926		0.00295	0.00503316				0.00632121	0.0063347	1	0	0	6	1	2	0	2	2	0	0	0	3	1				0.00182181		0.000353553		0.000212132	0.000848528				0.00152753		InChI=1S/C4H6/c1-3-4-2/h4H,1H2,2H3
55	C3H5N	Propane nitrile	NMOC_g	0.0643948	0.0177169	0.09	0.0188937	0.0394665	0.011416			0.0687075				0.0432419		2	2	1	9	2	3	0	0	1	0	0	0	6	0	0.0220691	0.00605716		0.00922179	0.0220144	0.00772987							0.0384049		InChI=1S/C3H5N/c1-2-3-4/h2H2,1H3
56	C4H8	Trans-2-butene	NMOC_g	0.0136667	0.027619	0.029025	0.0420483	0.146595	0.0116957		0.0422644	0.0837412			0.025	0.034689	0.110253	3	3	4	10	2	2	0	4	6	0	0	1	6	2	0.00602771	0.0205183	0.0190561	0.0345817	0.124804	0.000424264		0.0453618	0.057088				0.0160049	0.0873236	InChI=1S/C4H8/c1-3-4-2/h3-4H,1-2H3/b4-3+
56	C4H8	Cis-2-butene	NMOC_g	0.0115667	0.0204181	0.02435	0.0341725	0.116524	0.0105873		0.027356	0.0574198			0.02	0.0302138	0.0972483	3	3	4	10	2	2	0	5	6	0	0	1	6	2	0.00573265	0.00938445	0.0140023	0.0262009	0.0993485	0.00120208		0.0348692	0.0352031				0.0191862	0.0661169	InChI=1S/C4H8/c1-3-4-2/h3-4H,1-2H3/b4-3-
56	C4H8	1-Butene	NMOC_g	0.079725	0.182493	0.0785	0.163209	0.471053	0.0847506	0.150447	0.239023	0.218709			0.085	0.0924524	0.643681	4	4	4	11	3	3	1	7	6	0	0	1	7	3	0.0438906	0.0940492	0.0602965	0.103227	0.295712	0.0442037		0.497056	0.109608				0.0263827	0.371902	InChI=1S/C4H8/c1-3-4-2/h3H,1,4H2,2H3
56	C4H8	I-butene	NMOC_g	0.072	0.0846837	0.11	0.122101	0.583992	0.0413554		0.374664	0.171842			0.055	0.156746	0.360644	2	3	2	10	2	2	0	5	6	0	0	1	6	2	0.0678823	0.0290315	0.0282843	0.102858	0.49455	0.0394566		0.704042	0.107024				0.186986	0.373856	InChI=1S/C4H8/c1-4(2)3/h1H2,2-3H3
56	C3H4O	Acrolein	NMOC_g	1.1276	0.482464	0.65	0.591694	0.247248	0.468672	0.210032	0.165297	0.488275				0.628169	0.421427	2	3	1	12	3	4	1	4	3	0	0	0	11	2	0.37109	0.337656		0.302341	0.178259	0.180971		0.0731669	0.432605				0.479141	0.0556879	InChI=1S/C3H4O/c1-2-3-4/h2-3H,1H2
57	C2H3NO	Methyl isocyanate + hydroxyacetonitrile	NMOC_g				0.0271124	0.0298523	0.00463411			0.0667685				0.0251857		0	0	0	2	1	1	0	0	1	0	0	0	1	0				0.0084678											57.02086_C2H3NO
57	C2H3NO	Methyl isocyanate	NMOC_g		0.0052													0	1	0	0	0	0	0	0	0	0	0	0	0	0															InChI=1S/C2H3NO/c1-3-2-4/h1H3
57	C2H3NO	Hydroxy acetonitrile	NMOC_g		0.0035													0	1	0	0	0	0	0	0	0	0	0	0	0	0															InChI=1S/C2H3NO/c3-1-2-4/h4H,2H2
57	C3H7N	Propeneamines	NMOC_g				0.0115269	0.00387396	0.00082749			0.0270615				0.00687843		0	0	0	2	1	1	0	0	1	0	0	0	1	0				0.00943725											57.05726_C3H7N
58	C4H10	Butane	NMOC_g	0.0313	0.0951841	0.0376667	0.104624	1.0505	0.0758667		0.561003	0.12862			0.02	0.0537792	0.349892	3	4	3	13	2	3	0	4	6	0	0	1	6	2	0.026587	0.0476109	0.021362	0.116289	1.03167	0.0555469		1.06618	0.0909986				0.0184617	0.23067	InChI=1S/C4H10/c1-3-4-2/h3-4H2,1-2H3
58	C4H10	I-butane	NMOC_g	0.00683333	0.0402465	0.0113333	0.0474749	0.46255	0.0182		0.160305	0.0753647			0.007	0.0187422	0.072131	3	2	3	11	2	2	0	5	6	0	0	1	6	2	0.00453689	0.0272186	0.0080829	0.065358	0.52531	0.00452548		0.326755	0.060675				0.00625642	0.0705254	InChI=1S/C4H10/c1-4(2)3/h4H,1-3H3
58	C3H6O	2-Propen-1-ol	NMOC_g		0.02207		0.0149712									0.00663166		0	1	0	1	0	0	0	0	0	0	0	0	1	0															InChI=1S/C3H6O/c1-2-3-4/h2,4H,1,3H2
58	C3H6O	Propanal	NMOC_g	0.419	0.0130226	0.1	0.178466	0.0387	0.15845						0.082	0.206823	0.155653	1	1	1	8	1	2	0	0	0	0	0	1	5	1				0.114425		0.0870448							0.147947		InChI=1S/C3H6O/c1-2-3-4/h3H,2H2,1H3
58	C3H6O	Acetone	NMOC_g	0.514369	0.730011	0.63	0.635706	0.926356	0.323804		0.308741	1.51176			0.525	0.501114	0.920742	3	4	1	12	5	4	0	7	7	0	0	1	13	3	0.237701	0.60686		0.322998	0.381407	0.197189		0.226336	1.21042				0.326591	1.19532	InChI=1S/C3H6O/c1-3(2)4/h1-2H3
58	C3H6O	Methyl vinyl ether	NMOC_g	0.254851				0.85								0.137539		1	0	0	0	1	0	0	0	0	0	0	0	1	0															InChI=1S/C3H6O/c1-3-4-2/h3H,1H2,2H3
58	C2H2O2	Glyoxal	NMOC_g	0.717			0.235341		0.158439			0.028579				0.343811		1	0	0	6	0	2	0	0	1	0	0	0	4	0				0.121854		0.0601897							0.200589		InChI=1S/C2H2O2/c3-1-2-4/h1-2H
59	C2H5NO	Acetamide	NMOC_g				0.0707448	1.63772	0.0101313	0.0248842	0.0170571	0.757975				0.0955516		0	0	0	2	2	1	1	1	1	0	0	0	2	0				0.0440454	1.90341								0.0200619		InChI=1S/C2H5NO/c1-2(3)4/h1H3,(H2,3,4)
59	C3H9N	Trimethylamine	NMOC_g	0.0441	0.0103635		0.00661112	0.0068364	0.00145619			0.0361663				0.0400699	0.00149758	1	1	0	3	1	2	0	0	1	0	0	0	2	1				0.00258176		0.00137758							0.0458922		InChI=1S/C3H9N/c1-4(2)3/h1-3H3
60	CH4N2O	Ureae	NMOC_g		0.078													0	1	0	0	0	0	0	0	0	0	0	0	0	0															InChI=1S/CH4N2O/c2-1(3)4/h(H4,2,3,4)
60	COS	unknown	NMOC_g				0.00135627		0.000274859									0	0	0	1	0	1	0	0	0	0	0	0	0	0															59.96646_COS
60	COS	Carbonyl sulfide	NMOC_g	0.057	0.206291	0.0247	0.0201548	0.719133	0.031		0.0290283	0.127959				0.0326434	0.0743	1	3	1	6	3	1	0	5	6	0	0	0	4	1		0.272303		0.0223668	0.803592			0.0321733	0.116492				0.0148188		InChI=1S/COS/c2-1-3
60	C3H8O	Isopropyl alcohol	NMOC_g	0.013	0.00356409		0.00574712		0.001							0.00791298		1	1	0	5	0	1	0	0	0	0	0	0	4	0				0.00238429									0.00216725		InChI=1S/C3H8O/c1-3(2)4/h3-4H,1-2H3
60	C2H4O2	Acetic acid	NMOC_g	3.40147	3.38442	3.05333	2.51412	5.49781	1.54202	4.48348	2.11858	5.2561	96.37	2.62	11.936	2.65471	1.42716	4	6	3	8	6	3	5	9	13	4	1	2	5	3	2.74845	1.49165	1.06726	2.18458	1.91232	0.347572	2.42754	1.1049	3.60769	99.133		10.98	0.949425	0.861829	InChI=1S/C2H4O2/c1-2(3)4/h1H3,(H,3,4)
60	C2H4O2	Methyl formate	NMOC_g	0.037			0.0310907		0.0726							0.0376667		1	0	0	7	0	2	0	0	0	0	0	0	3	0				0.0140673		0.000848528							0.00945163		InChI=1S/C2H4O2/c1-4-2-3/h2H,1H3
60	C2H4O2	Glycolaldehyde	NMOC_g	0.611443	0.74043	2.838	0.573281	1.51725	0.184112	0.570091	0.256135	0.475219				1.61046	1.75253	2	3	1	4	3	3	4	6	6	0	0	0	4	2	0.770704	0.157759		0.345948	1.65657	0.0607523	0.566075	0.19244	0.213984				1.25523	0.929799	InChI=1S/C2H4O2/c3-1-2-4/h1,4H,2H2
60	C2H8N2	1,1-Dimethylhydrazine	NMOC_g				0.0274		0.046									0	0	0	2	0	1	0	0	0	0	0	0	0	0				0.00777817											InChI=1S/C2H8N2/c1-4(2)3/h3H2,1-2H3
61	CH3NO2	Nitromethane	NMOC_g	0.145	0.011		0.0771478	0.0409313	0.0355165			0.0570736				0.0581969		1	1	0	7	2	1	0	0	1	0	0	0	5	0				0.0250968	0.0271087								0.0218733		InChI=1S/CH3NO2/c1-2(3)4/h1H3
62	C2H6S	Ethylene glycol	NMOC_g		0.0036													0	1	0	0	0	0	0	0	0	0	0	0	0	0															InChI=1S/C2H6O2/c3-1-2-4/h3-4H,1-2H2
62	C2H6S	Dimethyl sulfide	NMOC_g	0.0105333	0.00359402	0.00135	0.0157886	0.029572	0.00701658		0.103929	0.0155371				0.014086	0.0074	3	3	2	10	4	3	0	5	7	0	0	0	7	1	0.0129214	0.0027023	0.00120208	0.0239346	0.03998	0.00593514		0.226783	0.0147202				0.0127242		InChI=1S/C2H6S/c1-3-2/h1-2H3
62	CH3Cl	Chloromethane	NMOC_g	0.0906667	0.0546646	0.053	0.043585	0.2703	0.594		0.333251	1.5477			0.145	0.162461	0.702	3	2	3	6	2	1	0	4	6	0	0	1	9	1	0.0635715	0.0362952	0.0325115	0.0330932	0.174938			0.474397	1.60007				0.207485		InChI=1S/CH3Cl/c1-2/h1H3
63	HNOS	unknown	NMOC_g				0.000113083	0.00011394				0.000337215				0.000105822		0	0	0	1	1	0	0	0	1	0	0	0	1	0															62.97736_HNOS
64	C5H4	1,3-Pentadiyne	NMOC_g	0.0132	0.0161929		0.00968585	0.131967	0.0056844							0.00714295	0.00349436	1	1	0	1	1	1	0	0	0	0	0	0	1	1															InChI=1S/C5H4/c1-3-5-4-2/h1H,2H3
64	CH4O3	Hydroxymethylhydrogenperoxide	NMOC_g				0.19											0	0	0	1	0	0	0	0	0	0	0	0	0	0															InChI=1S/CH4O3/c2-1-4-3/h2-3H,1H2
65	C4H3N	Cyanoallene isomers	NMOC_g				0.00109211	0.00022788	0.000171969			0.000758733				0.000105822		0	0	0	2	1	1	0	0	1	0	0	0	1	0				0.000859681											65.02596_C4H3N
66	C5H6	Pentenyne isomers	NMOC_g				0.00826667		0.0082									0	0	0	3	0	1	0	0	0	0	0	0	0	0				0.00474271											66.046951_C5H6
66	C5H6	1,3-Cyclopentadiene	NMOC_g	0.0522	0.151045		0.0765863	0.0402002	0.0415916	0.0769355	0.0243054	0.0347331				0.0377886	0.0931045	1	3	0	7	4	3	1	2	1	0	0	0	3	2		0.10564		0.061142	0.0262776	0.040875		0.0215368					0.0221466	0.0523661	InChI=1S/C5H6/c1-2-4-5-3-1/h1-4H,5H2
66	C5H6	3-Penten-1-yne, (e)-	NMOC_g		0.00191913		0.00393065									0.000102026		0	1	0	1	0	0	0	0	0	0	0	0	1	0															InChI=1S/C5H6/c1-3-5-4-2/h1,4-5H,2H3/b5-4+
66	C5H6	3-Penten-1-yne, (z)-	NMOC_g		0.010144		0.00751448									0.00295874		0	1	0	1	0	0	0	0	0	0	0	0	1	0															InChI=1S/C5H6/c1-3-5-4-2/h1,4-5H,2H3/b5-4-
66	C5H6	4-Penten-1-yne	NMOC_g		0.00123372		0.00427747									0.000408102		0	1	0	1	0	0	0	0	0	0	0	0	1	0															InChI=1S/C5H6/c1-3-5-4-2/h1,4H,2,5H2
66	C5H6	1-Penten-3-yne	NMOC_g		0.00452366		0.00393065									0.00091823		0	1	0	1	0	0	0	0	0	0	0	0	1	0															InChI=1S/C5H6/c1-3-5-4-2/h3H,1H2,2H3
66	C5H6	1-Buten-3-yne, 2-methyl-	NMOC_g		0.00301577		0.00277458									0.000204051		0	1	0	1	0	0	0	0	0	0	0	0	1	0															InChI=1S/C5H6/c1-4-5(2)3/h1H,2H2,3H3
67	C4H5N	Pyrrole + butene nitrile isomers	NMOC_g									0.309816						0	0	0	0	0	0	0	0	1	0	0	0	0	0															67.0416599999999_C4H5N
67	C4H5N	2-Butenenitrile	NMOC_g				0.0059633									0.00460543		0	0	0	1	0	0	0	0	0	0	0	0	1	0															InChI=1S/C4H5N/c1-2-3-4-5/h2-3H,1H3/b3-2+
67	C4H5N	3-Butenenitrile	NMOC_g		0.00575738		0.008519									0.00637675		0	1	0	1	0	0	0	0	0	0	0	0	1	0															InChI=1S/C4H5N/c1-2-3-4-5/h2H,1,3H2
67	C4H5N	Pyrrole	NMOC_g		0.0415813	0.12	0.0255784	0.0635499	0.0174731							0.039131		0	2	1	7	1	1	0	0	0	0	0	0	3	0		0.0220353		0.024849									0.0214493		InChI=1S/C4H5N/c1-2-4-5-3-1/h1-5H
67	C4H5N	Methacrylonitrile	NMOC_g	0.0995	0.010281		0.011173	0.0149936								0.023806		1	1	0	4	1	0	0	0	0	0	0	0	3	0				0.00439247									0.0129553		InChI=1S/C4H5N/c1-4(2)3-5/h1H2,2H3
68	C5H8	Pentadiene isomer	NMOC_g				0.00696667		0.0062									0	0	0	3	0	1	0	0	0	0	0	0	0	0				0.00416813											68.062600255_C5H8
68	C5H8	Cyclopentene	NMOC_g	0.017	0.0475669		0.0288197	0.05085	0.0406							0.00678195		1	1	0	8	2	1	0	0	0	0	0	0	3	0				0.020016	0.0371231								0.00157749		InChI=1S/C5H8/c1-2-4-5-3-1/h1-2H,3-5H2
68	C5H8	1-Pentyne	NMOC_g													0.000204051		0	0	0	0	0	0	0	0	0	0	0	0	1	0															InChI=1S/C5H8/c1-3-5-4-2/h1H,4-5H2,2H3
68	C5H8	1,4-Pentadiene	NMOC_g		0.0304319		0.0354337	0.0124								0.00367292		0	1	0	1	1	0	0	0	0	0	0	0	1	0															InChI=1S/C5H8/c1-3-5-4-2/h3-4H,1-2,5H2
68	C5H8	Trans-1,3-pentadiene	NMOC_g	0.043	0.0829337		0.0324998	0.05505	0.0227		0.0093	0.0381				0.0263563		1	1	0	9	2	2	0	2	2	0	0	0	4	0				0.0124133	0.049851	0.00523259		0.000141421	0.026163				0.00779785		InChI=1S/C5H8/c1-3-5-4-2/h3-5H,1H2,2H3/b5-4+
68	C5H8	Cis-1,3-pentadiene	NMOC_g		0.0481153		0.02655	0.0493	0.0221							0.016018		0	1	0	4	1	1	0	0	0	0	0	0	1	0				0.00795845											InChI=1S/C5H8/c1-3-5-4-2/h3-5H,1H2,2H3/b5-4-
68	C5H8	2-Pentyne	NMOC_g		0.00246745		0.00242776									0.000816204		0	1	0	1	0	0	0	0	0	0	0	0	1	0															InChI=1S/C5H8/c1-3-5-4-2/h3H2,1-2H3
68	C5H8	1-Butyne, 3-methyl-	NMOC_g		0.00109664													0	1	0	0	0	0	0	0	0	0	0	0	0	0															InChI=1S/C5H8/c1-4-5(2)3/h1,5H,2-3H3
68	C5H8	Isoprene	NMOC_g	0.102326	0.425396	0.12825	0.25823	0.64632	0.202466	0.058335	0.0448445	0.177995		0.225278	0.188	0.290734	0.15349	5	4	4	14	5	3	2	10	12	0	1	2	8	3	0.0789109	0.372795	0.195121	0.315	0.532692	0.256809	0.0430937	0.0242384	0.18942			0.25173	0.232998	0.153711	InChI=1S/C5H8/c1-4-5(2)3/h4H,1-2H2,3H3
68	C4H4O	Furan	NMOC_g	0.335066	0.503416	0.41	0.396103	0.968017	0.19848	0.247429	0.129139	0.374109	2.615	0.407656	1.2	0.252508	0.16497	3	6	1	15	5	4	4	8	15	2	1	2	8	3	0.0591553	0.305192		0.277653	0.668686	0.0821205	0.11014	0.0784796	0.234542	2.22739		1.24451	0.204642	0.0680818	InChI=1S/C4H4O/c1-2-4-5-3-1/h1-4H
69	C4H7N	Dihydropyrrole + butane nitrile	NMOC_g						0.00334669			0.0787397						0	0	0	0	0	1	0	0	1	0	0	0	0	0															69.05726_C4H7N
69	C4H7N	Isobutyronitrile	NMOC_g		0.00612533		0.0158761	0.0294953								0.00955388		0	1	0	1	1	0	0	0	0	0	0	0	1	0															InChI=1S/C4H7N/c1-4(2)3-5/h4H,1-2H3
69	C4H5O	unknown	NMOC_g				0.00295318	0.0017091	0.000552631			0.00303493				0.00455035		0	0	0	1	1	1	0	0	1	0	0	0	1	0															69.03346_C4H6O
69	C3H3NO	unknown	NMOC_g				0.00349144	0.00432972	0.000689332			0.00961062				0.00634932		0	0	0	1	1	1	0	0	1	0	0	0	1	0															69.02086_C3H3NO
70	C5H10	Pentene + methyl butene	NMOC_g							0.013926								0	0	0	0	0	0	1	0	0	0	0	0	0	0															70.07766_C5H10
70	C5H10	Cyclopentane	NMOC_g	0.005	0.035		0.00304509	0.0628	0.0008		0.00237768	0.0716909				0.00199578	0.0094719	1	1	0	9	2	1	0	1	4	0	0	0	6	2				0.00340009	0.0823072				0.133134				0.000978869	0.00725223	InChI=1S/C5H10/c1-2-4-5-3-1/h1-5H2
70	C5H10	Trans-2-pentene	NMOC_g	0.00775	0.0240789	0.0033	0.0208486	0.117267	0.0096		0.00796483	0.0501854				0.0273122	0.114898	2	2	1	10	3	2	0	4	6	0	0	0	6	2	0.00459619	0.0085968		0.0122907	0.0771534	0.00509117		0.00228096	0.0467989				0.0313473	0.127424	InChI=1S/C5H10/c1-3-5-4-2/h3,5H,4H2,1-2H3/b5-3+
70	C5H10	Cis-2-pentene	NMOC_g	0.00575	0.0512119	0.0019	0.0263673	0.115733	0.01875		0.00526705	0.0228818				0.0149565	0.0929	2	2	1	9	3	2	0	3	6	0	0	0	6	1	0.00459619	0.0667677		0.0190946	0.107255	0.0180312		0.000305379	0.0181696				0.0133897		InChI=1S/C5H10/c1-3-5-4-2/h3,5H,4H2,1-2H3/b5-3-
70	C5H10	1-Pentene	NMOC_g	0.0261818	0.0585364		0.0384117	0.176869	0.0150512		0.0116241	0.0764763				0.0265761	0.3059	1	2	0	11	3	2	0	4	6	0	0	0	6	2		0.00788425		0.0257564	0.143061	0.00233345		0.00604741	0.042506				0.0176701	0.470182	InChI=1S/C5H10/c1-3-5-4-2/h3H,1,4-5H2,2H3
70	C5H10	2-Methyl-1-butene	NMOC_g	0.01295	0.014	0.0044	0.0279104	0.111033	0.01235		0.01095	0.05205				0.0191094	0.0104975	2	1	1	10	3	2	0	2	2	0	0	0	5	1	0.00997021			0.0173013	0.0734501	0.00374767		0.0013435	0.0352846				0.00851608		InChI=1S/C5H10/c1-4-5(2)3/h2,4H2,1,3H3
70	C5H10	3-Methyl-1-butene	NMOC_g	0.01405	0.0297273	0.0038	0.0145891	0.0906333	0.00765		0.00578395	0.027389				0.0150145	0.0412	2	2	1	9	3	2	0	4	6	0	0	0	6	1	0.0126572	0.0194133		0.0104712	0.0835531	0.00615183		0.00178717	0.012592				0.00781698		InChI=1S/C5H10/c1-4-5(2)3/h4-5H,1H2,2-3H3
70	C5H10	2-Methyl-2-butene	NMOC_g	0.00564545	0.00264351	0.004	0.0301903	0.159383	0.00980141		0.00746273	0.0491213				0.0130666		2	1	1	8	2	1	0	2	2	0	0	0	3	0	0.00296985			0.0307586	0.156483			0.00325269	0.0470933				0.00557701		InChI=1S/C5H10/c1-4-5(2)3/h4H,1-3H3
70	C3H2O2	Propiolic acid	NMOC_g				0.0120635	0.00535518	0.00285585			0.00944201				0.0100531		0	0	0	2	1	1	0	0	1	0	0	0	1	0				0.0019283											InChI=1S/C3H2O2/c1-2-3(4)5/h1H,(H,4,5)
70	C4H6O	Mvk + methacrolein + crotonaldehyde	NMOC_g							0.130128								0	0	0	0	0	0	1	0	0	0	0	0	0	0															70.04126_C4H6O
70	C4H6O	Crotonaldehyde	NMOC_g	0.454996	0.106596	0.24	0.197752	0.0253378	0.140638						0.302	0.241267	0.16172	1	1	1	8	1	2	0	0	0	0	0	1	5	1				0.14246		0.00212132							0.158147		InChI=1S/C4H6O/c1-2-3-4-5/h2-4H,1H3/b3-2+
70	C4H6O	2,3-Dihydrofuran	NMOC_g		0.013571		0.0183238	0.0061								0.0060195		0	1	0	1	1	0	0	0	0	0	0	0	1	0															InChI=1S/C4H6O/c1-2-4-5-3-1/h1,3H,2,4H2
70	C4H6O	2,5-Dihydrofuran	NMOC_g		0.00328993		0.00289461		0.0153							0.000510128		0	1	0	3	0	1	0	0	0	0	0	0	1	0				0.0013852											InChI=1S/C4H6O/c1-2-4-5-3-1/h1-2H,3-4H2
70	C4H6O	Methyl vinyl ketone	NMOC_g	0.423545	0.175186	0.39	0.308037	0.100611	0.214215		0.0871438	0.321633			0.499	0.426268	0.152137	1	2	1	10	2	2	0	2	2	0	0	1	5	1		0.114028		0.167336	0.0258094	0.0742462		0.0019799	0.106773				0.267582		InChI=1S/C4H6O/c1-3-4(2)5/h3H,1H2,2H3
70	C4H6O	Methacrolein	NMOC_g	0.123709	0.0702798	0.15	0.093756	0.0921512	0.0565619						0.198	0.13208	0.0487158	1	2	1	9	1	2	0	0	0	0	0	1	5	1		0.039966		0.0441474		0.0441235							0.0995134		InChI=1S/C4H6O/c1-4(2)3-5/h3H,1H2,2H3
70	C4H6O	Butane nitrile	NMOC_g		0.00638599		0.00601159	0.013								0.00275469		0	2	0	1	1	0	0	0	0	0	0	0	1	0		0.00185829													InChI=1S/C4H7N/c1-2-3-4-5/h2-3H2,1H3
71	C4H9N	Butene amine	NMOC_g				0.00291114	0.00182304	0.000276316			0.0151747				0.00211644		0	0	0	1	1	1	0	0	1	0	0	0	1	0															InChI=1S/C4H9N/c1-2-3-4-5/h2H,1,3-5H2
72	C3H4O2	Pyruvaldehyde (=methyl glyoxal) + acrylic acid	NMOC_g						0.0839832			0.509953						0	0	0	0	0	1	0	0	1	0	0	0	0	0															72.02056_C3H4O2
72	C3H4O2	Acrylic acid	NMOC_g		0.096		0.0684501		0.0097									0	1	0	3	0	1	0	0	0	0	0	0	0	0				0.0644044											InChI=1S/C3H4O2/c1-2-3(4)5/h2H,1H2,(H,4,5)
72	C3H4O2	Methylglyoxal	NMOC_g	1.37605	0.481901		0.526506	0.194396	0.362673	0.10844	0.103596					1.11848	0.205834	2	1	0	6	1	2	1	2	0	0	0	0	4	1	1.03796			0.298711		0.335632		0.025957					0.657762		InChI=1S/C3H4O2/c1-3(5)2-4/h2H,1H3
72	C5H12	N-pentane	NMOC_g	0.0161333	0.0574391	0.00803333	0.0529025	0.494033	0.0151		0.0108276	0.0823888			0.0028	0.0272957	0.618912	3	3	3	11	3	2	0	4	6	0	0	1	6	2	0.0224389	0.0256089	0.00340637	0.0552694	0.366011	0.00296985		0.00667931	0.142776				0.017191	0.652076	InChI=1S/C5H12/c1-3-5-4-2/h3-5H2,1-2H3
72	C5H12	Isopentane	NMOC_g	0.0131	0.0159056	0.0103667	0.0287661	0.0798	0.0078		0.0661293	0.371814			0.0037	0.0222874	0.202378	2	3	3	10	2	2	0	2	4	0	0	1	6	2	0.0154149	0.00809779	0.00945533	0.0384768	0.0613769	0.00113137		0.0119794	0.488883				0.0151485	0.266752	InChI=1S/C5H12/c1-4-5(2)3/h5H,4H2,1-3H3
72	C5H12	2,2-Dimethylpropane	NMOC_g				0.00186667		0.0001								0.00162892	0	0	0	3	0	1	0	0	0	0	0	0	0	1				0.00271539											InChI=1S/C5H12/c1-5(2,3)4/h1-4H3
72	C4H8O	Mek + butanal + 2-methylpropanal	NMOC_g						0.0332037									0	0	0	0	0	1	0	0	0	0	0	0	0	0															72.05696_C4H8O
72	C4H8O	N-butanal	NMOC_g	0.03	0.0226549		0.0414525	0.0151001	0.0288		0.0146058	0.0447197				0.0535327	0.1714	1	1	0	10	2	2	0	5	6	0	0	0	6	2				0.0288856	0.0120915	0.00876812		0.00908487	0.0341638				0.0604927	0.123886	InChI=1S/C4H8O/c1-2-3-4-5/h4H,2-3H2,1H3
72	C4H8O	Tetrahydrofuran	NMOC_g		0.00271859		0.00254029		0.0016							0.0015903		0	1	0	4	0	1	0	0	0	0	0	0	5	0				0.00256797									0.00119094		InChI=1S/C4H8O/c1-2-4-5-3-1/h1-4H2
72	C4H8O	Methyl ethyl ketone	NMOC_g	0.1444	0.104586	0.5	0.168792	0.256936	0.110957	0.0493118	0.122123	0.21312			0.469	0.250761	0.111677	2	3	1	11	3	3	1	7	6	0	0	1	11	3	0.00650538	0.0435582		0.103011	0.244523	0.063275		0.14329	0.15032				0.362137	0.0868866	InChI=1S/C4H8O/c1-3-4(2)5/h3H2,1-2H3
72	C4H8O	2-Methylpropanal	NMOC_g	0.05	0.0297535	0.18	0.0419109	0.145325	0.04545						0.165	0.0408606		1	1	1	9	1	2	0	0	0	0	0	1	5	0				0.0217601		0.00219203							0.0320317		InChI=1S/C4H8O/c1-4(2)3-5/h3-4H,1-2H3
73	C2H3NO2	Nitroethene	NMOC_g				0.00582914	0.00011394	0.000896569							0.00179898		0	0	0	2	1	1	0	0	0	0	0	0	1	0				0.00575707											InChI=1S/C2H3NO2/c1-2-3(4)5/h2H,1H2
73	C3H7NO	unknown	NMOC_g				0.0112609	0.0161795	0.00137575			0.069129				0.0134394		0	0	0	1	1	1	0	0	1	0	0	0	1	0															73.05216_C3H7NO
73	CH3N3O	unknown	NMOC_g				0.00238162	0.00307638	0.000515907			0.00514253				0.00317466		0	0	0	1	1	1	0	0	1	0	0	0	1	0															73.02705999999989_CH3N3O
73	CHN2O2	unknown	NMOC_g				0.000845326	0.00364608	0.000137187			0.0116339				0.000211644		0	0	0	1	1	1	0	0	1	0	0	0	1	0															73.00326_CH2N2O2
74	C4H10O	1-Butanol	NMOC_g		0.00959563		0.333708		0.208							0.00591748		0	1	0	4	0	1	0	0	0	0	0	0	1	0				0.565148											InChI=1S/C4H10O/c1-2-3-4-5/h5H,2-4H2,1H3
74	C3H6O2	Methyl acetate + ethyl formate + hydroxyacetone	NMOC_g					0.324843										0	0	0	0	1	0	0	0	0	0	0	0	0	0															74.03626_C3H6O2
74	C3H6O2	Propanoic acid	NMOC_g		0.13													0	1	0	0	0	0	0	0	0	0	0	0	0	0															InChI=1S/C3H6O2/c1-2-3(4)5/h2H2,1H3,(H,4,5)
74	C3H6O2	Ethyl formate	NMOC_g				0.0142885		0.0180236									0	0	0	3	0	1	0	0	0	0	0	0	0	0				0.0087178											InChI=1S/C3H6O2/c1-2-5-3-4/h3H,2H2,1H3
74	C3H6O2	Methyl acetate	NMOC_g	0.215308	0.0310264		0.254171	0.0802	0.370485							0.280964		1	1	0	8	1	1	0	0	0	0	0	0	3	0				0.295097									0.226261		InChI=1S/C3H6O2/c1-3(4)5-2/h1-2H3
74	C3H6O2	Acetol	NMOC_g	1.16013	0.311622	1.13	0.620954	1.16233	0.391192	1.14392	0.541124	2.08976	21.56		8.89	2.16367	1.0158	2	2	1	5	3	2	3	8	12	1	0	1	6	2	0.103518	0.438136		0.460859	0.934023	0.207694	0.750831	0.46972	2.59581				2.39032	0.939321	InChI=1S/C3H6O2/c1-3(5)2-4/h4H,2H2,1H3
74	C3H6O2	Acetaldehyde, methoxy-	NMOC_g				0.00289019											0	0	0	1	0	0	0	0	0	0	0	0	0	0															InChI=1S/C3H6O2/c1-5-3-2-4/h2H,3H2,1H3
75	C2H5NO2	Nitroethane or ethane nitrite	NMOC_g				0.00654745	0.00125334	0.000276316			0.0023605				0.000846576		0	0	0	2	1	1	0	0	1	0	0	0	1	0				0.00785249											75.03146_C2H5NO2
76	C2H4O3	Peroxyacetic acid/hydroperoxy glycolaldehyde	NMOC_g						0.000141071			0.000168607				0.00105822		0	0	0	0	0	1	0	0	1	0	0	0	1	0															76.03801999999999_C2H4O3
76	C2H4O3	Glycolic acid	NMOC_g				0.0668411		0.0046									0	0	0	3	0	1	0	0	0	0	0	0	0	0				0.0372244											InChI=1S/C2H4O3/c3-1-2(4)5/h3H,1H2,(H,4,5)
76	C3H8O2	unknown	NMOC_g				0.00802802	0.0153819	0.00206363			0.0123083				0.00920652		0	0	0	1	1	1	0	0	1	0	0	0	1	0															76.05186_C3H8O2
76	CS2	Carbon disulfide	NMOC_g	0.002	0.0263195		0.00052125									0.00358071		1	1	0	4	0	0	0	0	0	0	0	0	7	0				6.33686e-05									0.00724579		InChI=1S/CS2/c2-1-3
76	C5O	unknown	NMOC_g				0.000245681	0.00034182				0.000843037				0.000211644		0	0	0	1	1	0	0	0	1	0	0	0	1	0															75.99436_C5HO
76	C2H5Cl	Ethylchloride	NMOC_g	0.001	0.000542701		0.000565107	0.0014	0.001		0.001	0.0058				0.001		1	2	0	4	1	1	0	2	2	0	0	0	6	0		0.00020181		0.000345406				0.000848528	0.0046669				0.000905539		InChI=1S/C2H5Cl/c1-2-3/h2H2,1H3
77	C5H3N	unknown	NMOC_g				0.00112015	0.00125334	0.000449741			0.00177038				0.000423288		0	0	0	1	1	1	0	0	1	0	0	0	1	0															77.02596_C5H3N
77	CH3NOS	N-sulfinyl methanamine	NMOC_g				0.000126151	0.00022788				0.000252911				0.000105822		0	0	0	1	1	0	0	0	1	0	0	0	1	0															InChI=1S/CH3NOS/c2-1-4-3/h1H,2H2
77	C3H11NO	unknown	NMOC_g				0.000256114	0.00045576				0.000337215				0.000105822		0	0	0	1	1	0	0	0	1	0	0	0	1	0															77.08346_C3H11NO
77	CH3NO3	Methyl nitrate	NMOC_g	0.00225	0.00179664	0.0083	0.00177104		0.002		0.00579665	0.0392069				0.0223816	0.0598	2	2	2	6	0	1	0	5	6	0	0	0	5	1	0.00247487	0.000560939	0.0113137	0.000875116				0.00340273	0.065063				0.0448016		InChI=1S/CH3NO3/c1-5-2(3)4/h1H3
78	C2H6O3	Ethene hydroxyperoxide	NMOC_g	0.035			0.0136667		0.038							0.0195		1	0	0	3	0	1	0	0	0	0	0	0	4	0				0.00251661									0.007		InChI=1S/C2H6O3/c1-2(3)7-4-5-6/h2-3H,1H3
78	C6H6	Benzene	NMOC_g	0.434336	0.751281	0.385	0.508859	1.3238	0.437834	1.57889	0.460587	0.967365			0.363	0.241929	1.58123	5	4	4	14	5	3	1	7	7	0	0	2	15	3	0.48195	0.383936	0.2284	0.173328	1.04532	0.212422		0.322764	0.425876			0.0254558	0.178948	1.03254	InChI=1S/C6H6/c1-2-4-6-5-3-1/h1-6H
78	C6H6	1,5-Hexadiyne	NMOC_g		0.000685402		0.00104047											0	1	0	1	0	0	0	0	0	0	0	0	0	0															InChI=1S/C6H6/c1-3-5-6-4-2/h1-2H,5-6H2
78	C6H6	Divinylacetylene	NMOC_g		0.0106923		0.00825839	0.0032	0.0068							0.00234659		0	1	0	4	1	1	0	0	0	0	0	0	1	0				0.00570846											InChI=1S/C6H6/c1-3-5-6-4-2/h3-4H,1-2H2
79	C5H5N	Pyridine + pentadienenitriles	NMOC_g						0.00775754			0.187407						0	0	0	0	0	1	0	0	1	0	0	0	0	0															79.0416599999999_C5H5N
79	C5H5N	Pyridine	NMOC_g		0.0196025		0.0299137	0.120464								0.0194262		0	1	0	1	1	0	0	0	0	0	0	0	1	0															InChI=1S/C5H5N/c1-2-4-6-5-3-1/h1-5H
79	C4HNO	unknown	NMOC_g				0.000462472	0.00045576	0.000171969			0.000337215				0.000211644		0	0	0	1	1	1	0	0	1	0	0	0	1	0															79.0052599999999_C4HON
79	CH7N2S	unknown	NMOC_g				0.00604937	0.0149261	0.00179459			0.0308552				0.00349213		0	0	0	1	1	1	0	0	1	0	0	0	1	0															79.03246_CH8N2S
80	C5H4O	2,4-Cyclopentadiene-1-one + 2 other HCO isomers	NMOC_g									0.155456						0	0	0	0	0	0	0	0	1	0	0	0	0	0															80.02566_C5H4O
80	C5H4O	2,4-Cyclopentadiene-1-one	NMOC_g	0.2044	0.0971518		0.146361	0.0618901	0.0730729	0.0974821	0.110743					0.218047	0.0860278	1	2	0	2	1	1	1	2	0	0	0	0	1	1		0.121837		0.147964				0.0798753							InChI=1S/C5H4O/c6-5-3-1-2-4-5/h1-4H
80	C6H8	Methyl Cyclopentadiene isomers	NMOC_g				0.0310666	0.0252947	0.00770784			0.0580009						0	0	0	4	1	2	0	0	1	0	0	0	0	0				0.0193017		0.00133242									80.062600255_C6H8
80	C6H8	1,4-Cyclohexadiene	NMOC_g				0.00184972											0	0	0	1	0	0	0	0	0	0	0	0	0	0															InChI=1S/C6H8/c1-2-4-6-5-3-1/h1-2,5-6H,3-4H2
80	C6H8	1,3-Cyclohexadiene	NMOC_g		0.0998835		0.0410984	0.0224								0.0175056		0	2	0	1	1	0	0	0	0	0	0	0	1	0		0.0567332													InChI=1S/C6H8/c1-2-4-6-5-3-1/h1-4H,5-6H2
80	C6H8	2-Hexene-4-yne	NMOC_g													0.000783833		0	0	0	0	0	0	0	0	0	0	0	0	1	0															InChI=1S/C6H8/c1-3-5-6-4-2/h3,5H,1-2H3/b5-3+
80	C6H8	1-Hexen-3-yne	NMOC_g		0.00370117		0.00728327									0.00209022		0	1	0	1	0	0	0	0	0	0	0	0	1	0															InChI=1S/C6H8/c1-3-5-6-4-2/h3H,1,4H2,2H3
80	C6H8	1,3-Cyclopentadiene, 1-methyl-	NMOC_g		0.0837562		0.0544511	0.0467								0.0350112		0	1	0	1	1	0	0	0	0	0	0	0	1	0															InChI=1S/C6H8/c1-6-4-2-3-5-6/h2-4H,5H2,1H3
80	C6H8	1,3-Cyclopentadiene, 5-methyl-	NMOC_g		0.0741605		0.046821	0.0394								0.0295244		0	1	0	1	1	0	0	0	0	0	0	0	1	0															InChI=1S/C6H8/c1-6-4-2-3-5-6/h2-6H,1H3
80	C4H4N2	Pyrazine	NMOC_g													0.00295874		0	0	0	0	0	0	0	0	0	0	0	0	1	0															InChI=1S/C4H4N2/c1-2-6-4-3-5-1/h1-4H
81	C5H7N	Methyl pyrrole isomers + Pentene nitrile isomers	NMOC_g		0.0047							0.126961						0	1	0	0	0	0	0	0	1	0	0	0	0	0															81.05726_C5H7N
81	C5H7N	Butanenitrile, 2-methylene-	NMOC_g													0.00140169		0	0	0	0	0	0	0	0	0	0	0	0	1	0															InChI=1S/C5H7N/c1-3-5(2)4-6/h2-3H2,1H3
81	C5H7N	3-Butenenitrile, 3-methyl-	NMOC_g													0.00150951		0	0	0	0	0	0	0	0	0	0	0	0	1	0															InChI=1S/C5H7N/c1-5(2)3-4-6/h1,3H2,2H3
81	C5H7N	1H-pyrrole, 3-methyl-	NMOC_g				0.00550431									0.00409725		0	0	0	1	0	0	0	0	0	0	0	0	1	0															InChI=1S/C5H7N/c1-5-2-3-6-4-5/h2-4,6H,1H3
81	C5H7N	1H-pyrrole, 2-methyl-	NMOC_g		0.00671694		0.0157994	0.0159889								0.00733193		0	1	0	1	1	0	0	0	0	0	0	0	1	0															InChI=1S/C5H7N/c1-5-3-2-4-6-5/h2-4,6H,1H3
81	C5H7N	1-Methylpyrrole	NMOC_g		0.0146676		0.00866144	0.027803	0.0084112							0.00614588		0	1	0	4	1	1	0	0	0	0	0	0	1	0				0.00640033											InChI=1S/C5H7N/c1-6-4-2-3-5-6/h2-5H,1H3
81	C4H3NO	unknown	NMOC_g				0.00179222	0.0011394	0.000586442			0.00143316				0.00275137		0	0	0	1	1	1	0	0	1	0	0	0	1	0															81.02086_C4H3NO
81	C5H5O	unknown	NMOC_g				0.00879287	0.00865944	0.00158153			0.0181253				0.0110055		0	0	0	1	1	1	0	0	1	0	0	0	1	0															81.03346_C5H5O
82	C6H10	C6H10 isomers	NMOC_g	0.0282			0.0546343			0.0136977	0.0128579	0.209916					0.0682232	1	0	0	5	0	0	1	2	1	0	0	0	0	1				0.036305				0.00255696							82.078250319_C6H10
82	C6H10	Cyclohexene	NMOC_g		0.0242489		0.0166244	0.046488	0.0115849							0.00361807		0	1	0	4	1	1	0	0	0	0	0	0	1	0				0.00572979											InChI=1S/C6H10/c1-2-4-6-5-3-1/h1-2H,3-6H2
82	C6H10	Trans-1,3-hexadiene	NMOC_g		0.012266		0.00742299	0.022326	0.00369519							0.00323722		0	1	0	4	1	1	0	0	0	0	0	0	1	0				0.00319255											InChI=1S/C6H10/c1-3-5-6-4-2/h3,5-6H,1,4H2,2H3/b6-5+
82	C6H10	Cis-1,3-hexadiene	NMOC_g				0.00273333		0.00189753									0	0	0	3	0	1	0	0	0	0	0	0	0	0				0.00153731											InChI=1S/C6H10/c1-3-5-6-4-2/h3,5-6H,1,4H2,2H3/b6-5-
82	C6H10	1,4-Hexadiene, (e)-	NMOC_g		0.00500075		0.00913299	0.00528774								0.000952124		0	1	0	1	1	0	0	0	0	0	0	0	1	0															InChI=1S/C6H10/c1-3-5-6-4-2/h3-4,6H,1,5H2,2H3/b6-4+
82	C6H10	1,4-Hexadiene, (z)-	NMOC_g		0.00396286		0.00450869											0	1	0	1	0	0	0	0	0	0	0	0	0	0															InChI=1S/C6H10/c1-3-5-6-4-2/h3-4,6H,1,5H2,2H3/b6-4-
82	C6H10	1,5-Hexadiene	NMOC_g		0.00952972		0.0160694	0.0106489								0.00171382		0	1	0	1	1	0	0	0	0	0	0	0	1	0															InChI=1S/C6H10/c1-3-5-6-4-2/h3-4H,1-2,5-6H2
82	C6H10	3-Hexyne	NMOC_g					0.00609559										0	0	0	0	1	0	0	0	0	0	0	0	0	0															InChI=1S/C6H10/c1-3-5-6-4-2/h3-4H2,1-2H3
82	C6H10	2,4-Hexadiene, (e,e)-	NMOC_g		0.00377415		0.00809252	0.0107958								0.00180903		0	1	0	1	1	0	0	0	0	0	0	0	1	0															InChI=1S/C6H10/c1-3-5-6-4-2/h3-6H,1-2H3/b5-3+,6-4+
82	C6H10	2,4-Hexadiene, (e,z)-	NMOC_g		0.00613299		0.0124856	0.0152022								0.00238031		0	1	0	1	1	0	0	0	0	0	0	0	1	0															InChI=1S/C6H10/c1-3-5-6-4-2/h3-6H,1-2H3/b5-3-,6-4+
82	C6H10	4-Methyl-1,3-pentadiene	NMOC_g		0.0115112		0.0230059	0.028495								0.00371328		0	1	0	1	1	0	0	0	0	0	0	0	1	0															InChI=1S/C6H10/c1-4-5-6(2)3/h4-5H,1H2,2-3H3
82	C6H10	1,3-Pentadiene, 2-methyl-, (e)-	NMOC_g		0.010945		0.0117342	0.0254105								0.00466541		0	1	0	1	1	0	0	0	0	0	0	0	1	0															InChI=1S/C6H10/c1-4-5-6(2)3/h4-5H,2H2,1,3H3/b5-4+
82	C6H10	1,3-Pentadiene, 2-methyl-, (z)-	NMOC_g		0.0290609		0.0631216									0.00914039		0	1	0	1	0	0	0	0	0	0	0	0	1	0															InChI=1S/C6H10/c1-4-5-6(2)3/h4-5H,2H2,1,3H3/b5-4-
82	C6H10	1,4-Pentadiene, 2-methyl-	NMOC_g		0.00500075		0.00913299	0.00484709								0.0015234		0	1	0	1	1	0	0	0	0	0	0	0	1	0															InChI=1S/C6H10/c1-4-5-6(2)3/h4H,1-2,5H2,3H3
82	C6H10	1,3-Pentadiene, 3-methyl-, (z)-	NMOC_g		0.00811442		0.0221966	0.010502								0.00361807		0	1	0	1	1	0	0	0	0	0	0	0	1	0															InChI=1S/C6H10/c1-4-6(3)5-2/h4-5H,1H2,2-3H3/b6-5-
82	C6H10	1,4-Pentadiene, 3-methyl-	NMOC_g		0.00188707		0.00300579									0.000476062		0	1	0	1	0	0	0	0	0	0	0	0	1	0															InChI=1S/C6H10/c1-4-6(3)5-2/h4-6H,1-2H2,3H3
82	C6H10	1,3-Butadiene, 2,3-dimethyl-	NMOC_g		0.00641605		0.00578037	0.00381892								0.00238031		0	1	0	1	1	0	0	0	0	0	0	0	1	0															InChI=1S/C6H10/c1-5(2)6(3)4/h1,3H2,2,4H3
82	C6H10	Cyclopentene, 3-methyl-	NMOC_g		0.00726523		0.00456649	0.0228401								0.00295158		0	1	0	1	1	0	0	0	0	0	0	0	1	0															InChI=1S/C6H10/c1-6-4-2-3-5-6/h2,4,6H,3,5H2,1H3
82	C6H10	1-Methylcyclopentene	NMOC_g		0.0217957		0.0198768	0.0555947	0.0116848							0.00837869		0	1	0	4	1	1	0	0	0	0	0	0	1	0				0.004082											InChI=1S/C6H10/c1-6-4-2-3-5-6/h4H,2-3,5H2,1H3
82	C5H6O	Pent-2-ynal	NMOC_g		0.00178205		0.00202583											0	1	0	1	0	0	0	0	0	0	0	0	0	0															InChI=1S/C5H6O/c1-2-3-4-5-6/h5H,2H2,1H3
82	C5H6O	1,4-Pentadien-3-one	NMOC_g				0.000900367									0.00103028		0	0	0	1	0	0	0	0	0	0	0	0	1	0															InChI=1S/C5H6O/c1-3-5(6)4-2/h3-4H,1-2H2
82	C5H6O	3-Methylfuran	NMOC_g	0.012	0.0183688	0.59	0.0276561	0.0350865	0.00978314						0.707	0.0270531	0.022081	1	1	1	9	1	1	0	0	0	0	0	1	3	1				0.0208939									0.00902667		InChI=1S/C5H6O/c1-5-2-3-6-4-5/h2-4H,1H3
82	C5H6O	2-Methylfuran	NMOC_g	0.22965	0.269548	0.08	0.191282	0.343631	0.116939	0.135379	0.100375	0.457809			0.101	0.181108	0.148926	2	3	1	11	3	2	1	4	2	0	0	1	4	1	0.266791	0.0743699		0.144337	0.194406	0.0277297		0.0661084	0.262337				0.101877		InChI=1S/C5H6O/c1-5-3-2-4-6-5/h2-4H,1H3
82	C5H6O	Cyclopentenone	NMOC_g		0.0270049		0.178795	0.0410047	0.056727							0.127755		0	1	0	4	1	1	0	0	0	0	0	0	1	0				0.106267											InChI=1S/C5H6O/c6-5-3-1-2-4-5/h1,3H,2,4H2
82	C5H6O	3-Cyclopenten-1-one	NMOC_g		0.0122002		0.00973522									0.00803621		0	1	0	1	0	0	0	0	0	0	0	0	1	0															InChI=1S/C5H6O/c6-5-3-1-2-4-5/h1-2H,3-4H2
82	C4H2O2	unknown	NMOC_g				0.00282051	0.00045576	0.000584986			0.000168607				0.00105822		0	0	0	1	1	1	0	0	1	0	0	0	1	0															82.00496_C4H2O2
82	C4H6N2	1-Methylpyrazole	NMOC_g				0.0135		0.0051									0	0	0	3	0	1	0	0	0	0	0	0	0	0				0.0122119											InChI=1S/C4H6N2/c1-6-4-2-3-5-6/h2-4H,1H3
83	C4H5NO	unknown	NMOC_g				0.0115345	0.0112801	0.00189312			0.0571579				0.0132278		0	0	0	1	1	1	0	0	1	0	0	0	1	0															83.03656_C4H5NO
83	C4H5NO	Methyloxazole	NMOC_g		0.002													0	1	0	0	0	0	0	0	0	0	0	0	0	0															InChI=1S/C4H5NO/c1-4-5-2-3-6-4/h2-3H,1H3
83	C5H9N	Pentanenitriles	NMOC_g						0.00134194			0.0472944						0	0	0	0	0	1	0	0	1	0	0	0	0	0															83.07296_C5H9N
83	C5H9N	Pentanenitrile	NMOC_g													0.00103924		0	0	0	0	0	0	0	0	0	0	0	0	1	0															InChI=1S/C5H9N/c1-2-3-4-5-6/h2-4H2,1H3
83	C5H9N	Butanenitrile, 2-methyl-	NMOC_g		0.00643325		0.00644761	0.0144298								0.00207848		0	1	0	1	1	0	0	0	0	0	0	0	1	0															InChI=1S/C5H9N/c1-3-5(2)4-6/h5H,3H2,1-2H3
83	C5H9N	Butanenitrile, 3-methyl-	NMOC_g		0.0086264		0.0117132	0.0171697								0.00498834		0	1	0	1	1	0	0	0	0	0	0	0	1	0															InChI=1S/C5H9N/c1-5(2)3-4-6/h5H,3H2,1-2H3
84	C4H4S	Thiophene	NMOC_g		0.0049349		0.0119496	0.0210016	0.00420362			0.0322883				0.0135488		0	1	0	2	2	1	0	0	1	0	0	0	2	0				0.00937856	0.0154172								0.0154094		InChI=1S/C4H4S/c1-2-4-5-3-1/h1-4H
84	C6H12	Hexenes+C6H12 isomers	NMOC_g	0.0143	0.0379994		0.0435447		0.0217846	0.00251125	0.00446354							1	1	0	6	0	3	1	1	0	0	0	0	0	0				0.0320039		0.0305841									84.093900383_C6H12
84	C6H12	Cyclohexane	NMOC_g	0.017	0.054		0.0042914	0.00444323	0.00235		0.00381791	0.119833				0.00473338	0.0456675	1	1	0	8	1	2	0	2	3	0	0	0	5	1				0.00340114		0.000919239		0.00426797	0.225349				0.00491935		InChI=1S/C6H12/c1-2-4-6-5-3-1/h1-6H2
84	C6H12	2-Hexene, (e)-	NMOC_g		0.00891023		0.00763009	0.0413996								0.00235631		0	1	0	1	1	0	0	0	0	0	0	0	1	0															InChI=1S/C6H12/c1-3-5-6-4-2/h3,5H,4,6H2,1-2H3/b5-3+
84	C6H12	Cis-2-hexene	NMOC_g		0.002		0.0134234	0.0186193	0.0147									0	1	0	4	1	1	0	0	0	0	0	0	0	0				0.0123902											InChI=1S/C6H12/c1-3-5-6-4-2/h3,5H,4,6H2,1-2H3/b5-3-
84	C6H12	1-Hexene	NMOC_g	0.081	0.090982		0.0473736	0.255733	0.04015		0.02175	0.0885308				0.0347119		1	2	0	8	1	2	0	2	2	0	0	0	4	0		0.107455		0.0316431		0.0383959		0.0129401	0.0749533				0.0158737		InChI=1S/C6H12/c1-3-5-6-4-2/h3H,1,4-6H2,2H3
84	C6H12	2-Methyl-1-pentene	NMOC_g	0.0035		0.0028	0.0871	0.0771571	0.0674									1	0	1	3	1	1	0	0	0	0	0	0	0	0				0.0284768											InChI=1S/C6H12/c1-4-5-6(2)3/h2,4-5H2,1,3H3
84	C6H12	1-Pentene, 4-methyl-	NMOC_g		0.00644278		0.00354143	0.0222867								0.00354121		0	1	0	3	1	0	0	0	0	0	0	0	3	0				0.00137093									0.00241592		InChI=1S/C6H12/c1-4-5-6(2)3/h4,6H,1,5H2,2-3H3
84	C6H12	2-Pentene, 4-methyl-	NMOC_g		0.00109664		0.00138729	0.00500745								0.000207909		0	1	0	1	1	0	0	0	0	0	0	0	1	0															InChI=1S/C6H12/c1-4-5-6(2)3/h4-6H,1-3H3/b5-4+
84	C6H12	2-Pentene, 2-methyl-	NMOC_g		0.0345443		0.019133	0.0346995								0.00512843		0	1	0	1	1	0	0	0	0	0	0	0	1	0															InChI=1S/C6H12/c1-4-5-6(2)3/h5H,4H2,1-3H3
84	C6H12	2-Pentene, 3-methyl-, (e)-	NMOC_g		0.00863607		0.00751448	0.011637								0.00249491		0	1	0	1	1	0	0	0	0	0	0	0	1	0															InChI=1S/C6H12/c1-4-6(3)5-2/h4H,5H2,1-3H3/b6-4+
84	C6H12	2-Pentene, 3-methyl-, (z)-	NMOC_g				0.0141041									0.00284143		0	0	0	1	0	0	0	0	0	0	0	0	1	0															InChI=1S/C6H12/c1-4-6(3)5-2/h4H,5H2,1-3H3/b6-4-
84	C6H12	1-Butene, 2,3-dimethyl-	NMOC_g		0.0198767		0.013237	0.037168								0.00422749		0	1	0	1	1	0	0	0	0	0	0	0	1	0															InChI=1S/C6H12/c1-5(2)6(3)4/h6H,1H2,2-4H3
84	C6H12	Methylcyclopentane	NMOC_g	0.007	0.00397533		0.00610723	0.0169266	0.00275							0.00298869		1	1	0	8	1	2	0	0	0	0	0	0	4	0				0.00436878		0.00247487							0.00339069		InChI=1S/C6H12/c1-6-4-2-3-5-6/h6H,2-5H2,1H3
84	C4H4O2	2-(3H)furanone	NMOC_g	0.9393	0.333869		0.483508	0.418219	0.323261	0.12716	0.153733	0.684546				0.723629	0.275722	2	2	0	8	2	3	1	2	1	0	0	0	6	1	0.142411	0.213267		0.0985541	0.14559	0.318646		0.0803982					0.247081		InChI=1S/C4H4O2/c5-4-2-1-3-6-4/h1,3H,2H2
84	C5H8O	3-Methyl-3-butene-2-one + cyclopentanone + HCO1 isomers	NMOC_g				0.134504		0.035996			0.269266						0	0	0	2	0	1	0	0	1	0	0	0	0	0				0.0670391											84.05696_C5H8O
84	C5H8O	4-Pentenal	NMOC_g		0.00164091		0.00393065									0.000985301		0	1	0	1	0	0	0	0	0	0	0	0	1	0															InChI=1S/C5H8O/c1-2-3-4-5-6/h2,5H,1,3-4H2
84	C5H8O	2-Pentenal, (e)-	NMOC_g				0.00335261									0.00110846		0	0	0	1	0	0	0	0	0	0	0	0	1	0															InChI=1S/C5H8O/c1-2-3-4-5-6/h3-5H,2H2,1H3/b4-3+
84	C5H8O	2H-pyran, 3,4-dihydro-	NMOC_g		0.00154439		0.00213874											0	1	0	1	0	0	0	0	0	0	0	0	0	0															InChI=1S/C5H8O/c1-2-4-6-5-3-1/h2,4H,1,3,5H2
84	C5H8O	3-Penten-2-one, (e)-	NMOC_g		0.000772194		0.00676303	0.00538309								0.016627		0	1	0	1	1	0	0	0	0	0	0	0	1	0															InChI=1S/C5H8O/c1-3-4-5(2)6/h3-4H,1-2H3/b4-3+
84	C5H8O	3-Penten-2-one (z)	NMOC_g		0.00193048		0.00283238									0.00480334		0	1	0	1	0	0	0	0	0	0	0	0	1	0															InChI=1S/C5H8O/c1-3-4-5(2)6/h3-4H,1-2H3/b4-3-
84	C5H8O	4-Penten-2-one	NMOC_g		0.00212353		0.00265897	0.0022609								0.00307906		0	1	0	1	1	0	0	0	0	0	0	0	1	0															InChI=1S/C5H8O/c1-3-4-5(2)6/h3H,1,4H2,2H3
84	C5H8O	2-Methyl-2-butenal	NMOC_g		0.00376445		0.0119817	0.00678269	0.0059							0.00307906		0	1	0	4	1	1	0	0	0	0	0	0	1	0				0.00743712											InChI=1S/C5H8O/c1-3-5(2)4-6/h3-4H,1-2H3/b5-3+
84	C5H8O	2-Ethylacrolein	NMOC_g		0.0035714		0.00508673									0.00320223		0	1	0	1	0	0	0	0	0	0	0	0	1	0															InChI=1S/C5H8O/c1-3-5(2)4-6/h4H,2-3H2,1H3
84	C5H8O	Pentenone	NMOC_g		0.0697505		0.951363	0.0797068	0.144478	0.0552474	0.0560292					0.0693252	0.609328	0	2	0	5	2	2	1	2	0	0	0	0	2	2		0.118032		1.59116	0.103426	0.12236		0.0323569					0.0740229	0.763119	InChI=1S/C5H8O/c1-3-5(6)4-2/h3H,1,4H2,2H3
84	C5H8O	3-Methyl-3-buten-2-one	NMOC_g		0.0280886		0.0403238	0.0375739								0.0286969		0	1	0	2	1	0	0	0	0	0	0	0	1	0				0.0089432											InChI=1S/C5H8O/c1-4(2)5(3)6/h1H2,2-3H3
84	C5H8O	2-Butenal, 3-methyl-	NMOC_g		0.00173744		0.00416187									0.00049265		0	1	0	1	0	0	0	0	0	0	0	0	1	0															InChI=1S/C5H8O/c1-5(2)3-4-6/h3-4H,1-2H3
84	C5H8O	Furan, 2,3-dihydro-5-methyl-	NMOC_g		0.00212353		0.00520233									0.00147795		0	1	0	1	0	0	0	0	0	0	0	0	1	0															InChI=1S/C5H8O/c1-5-3-2-4-6-5/h3H,2,4H2,1H3
84	C5H8O	Cyclopentanone	NMOC_g		0.0105211		0.122718	0.0318679	0.0834							0.0309138		0	1	0	4	1	1	0	0	0	0	0	0	1	0				0.0727458											InChI=1S/C5H8O/c6-5-3-1-2-4-5/h1-4H2
84	C5H8O	C5H8O isomers	NMOC_g													0.00135479		0	0	0	0	0	0	0	0	0	0	0	0	1	0															609.811_2.244
85	C3H3NO2	unknown	NMOC_g				0.00288125	0.005697	0.000586442			0.00775594				0.00412706		0	0	0	1	1	1	0	0	1	0	0	0	1	0															85.01586_C3H3NO2
85	C5H11N	unknown	NMOC_g				0.00183818	0.00193698	0.000242504			0.018041				0.00211644		0	0	0	1	1	1	0	0	1	0	0	0	1	0															85.08856_C5H11N
86	C6H14	2-Methylpentane+3-methylpentane	NMOC_g					0.0101407	0.00138012			0.0207387						0	0	0	0	1	1	0	0	1	0	0	0	0	0															86.10955_C6H14
86	C6H14	N-hexane	NMOC_g	0.0205	0.0345177	0.0101	0.0348021	0.217367	0.0101		0.00609892	0.103211				0.00780833	0.181723	2	3	1	10	3	2	0	3	6	0	0	0	9	2	0.0106066	0.0125451		0.0293548	0.0871264	0.00127279		0.00455127	0.179083				0.00655086	0.141813	InChI=1S/C6H14/c1-3-5-6-4-2/h3-6H2,1-2H3
86	C6H14	2-Methylpentane	NMOC_g	0.016	0.00885059		0.0073444	0.0770667	0.003		0.00397349	0.078303				0.00664474	0.11	1	1	0	6	3	1	0	4	6	0	0	0	5	1				0.00181925	0.056447			0.00494095	0.14233				0.00433264		InChI=1S/C6H14/c1-4-5-6(2)3/h6H,4-5H2,1-3H3
86	C6H14	3-Methylpentane	NMOC_g	0.008			0.00611483	0.0087	0.0032		0.00293395	0.0599661				0.00677948	0.157	1	0	0	9	2	1	0	4	5	0	0	0	2	1				0.00400099	0.000848528			0.00262717	0.107827				0.000707107		InChI=1S/C6H14/c1-4-6(3)5-2/h6H,4-5H2,1-3H3
86	C6H14	2,3-Dimethylbutane	NMOC_g		0.0031		0.001	0.07065			0.0141791	0.05409				0.0002	0.0112	0	1	0	1	2	0	0	2	4	0	0	0	1	1					0.0924189			0.0137475	0.0885601						InChI=1S/C6H14/c1-5(2)6(3)4/h5-6H,1-4H3
86	C6H14	2,2-Dimethylbutane	NMOC_g				0.00586667											0	0	0	3	0	0	0	0	0	0	0	0	0	0				0.00807857											InChI=1S/C6H14/c1-5-6(2,3)4/h5H2,1-4H3
86	C5H10O	3-Methyl-2-butanone + 2-methylbutanal+3-methylbutanal+2-pentanone +3-pentanone	NMOC_g						0.00619088			0.13438						0	0	0	0	0	1	0	0	1	0	0	0	0	0															86.07256_C5H10O
86	C5H10O	Pentanal	NMOC_g		0.0212475		0.0121388	0.0137										0	1	0	1	1	0	0	0	0	0	0	0	0	0															InChI=1S/C5H10O/c1-2-3-4-5-6/h5H,2-4H2,1H3
86	C5H10O	2-Pentanone	NMOC_g	0.1534	0.0260843	0.08	0.0388292	0.0341022	0.0524						0.085	0.025784		1	2	1	4	2	1	0	0	0	0	0	1	1	0		0.028165		0.0362786	0.0300756										InChI=1S/C5H10O/c1-3-4-5(2)6/h3-4H2,1-2H3
86	C5H10O	2-Methylbutanal	NMOC_g		0.00740235		0.0380946	0.06075	0.0422							0.00762839		0	1	0	4	1	1	0	0	0	0	0	0	1	0				0.0346106											InChI=1S/C5H10O/c1-3-5(2)4-6/h4-5H,3H2,1-2H3
86	C5H10O	3-Pentanone	NMOC_g			0.03	0.0329155		0.03						0.038	0.00961177		0	0	1	3	0	1	0	0	0	0	0	1	1	0				0.0221969											InChI=1S/C5H10O/c1-3-5(6)4-2/h3-4H2,1-2H3
86	C5H10O	3-Methyl-2-butanone	NMOC_g		0.000822483		0.0189408	0.0427309	0.0228							0.0108323		0	1	0	5	1	1	0	0	0	0	0	0	1	0				0.012704											InChI=1S/C5H10O/c1-4(2)5(3)6/h4H,1-3H3
86	C5H10O	2-Methyl-3-buten-2-ol	NMOC_g				0.0061											0	0	0	1	0	0	0	0	0	0	0	0	0	0															InChI=1S/C5H10O/c1-4-5(2,3)6/h4,6H,1H2,2-3H3
86	C5H10O	3-Methylbutanal	NMOC_g		0.0234408		0.0212362	0.0967024								0.012358		0	1	0	2	1	0	0	0	0	0	0	0	1	0				0.00152057											InChI=1S/C5H10O/c1-5(2)3-4-6/h4-5H,3H2,1-2H3
86	C3H2O3	unknown	NMOC_g				0.00827654	0.00330426	0.00137866			0.0112124				0.00550275		0	0	0	1	1	1	0	0	1	0	0	0	1	0															85.99986_C3H2O3
86	C4H6O2	2,3-Butanedione + methyl acrylate + other hco2	NMOC_g									0.967132						0	0	0	0	0	0	0	0	1	0	0	0	0	0															86.03626_C4H6O2
86	C4H6O2	2,3-Dihydro-1,4-dioxin	NMOC_g				0.00733196		0.00491519									0	0	0	3	0	1	0	0	0	0	0	0	0	0				0.00730776											InChI=1S/C4H6O2/c1-2-6-4-3-5-1/h1-2H,3-4H2
86	C4H6O2	2,3-Butadione	NMOC_g	0.88545	0.227619	0.73	0.604424	0.270306	0.264971	0.249755	0.26189				0.79	0.382551	0.159051	1	2	1	7	2	2	1	2	0	0	0	1	2	2		0.206319		0.686834	0.178167	0.0214536		0.14071					0.357062	0.0769866	InChI=1S/C4H6O2/c1-3(5)4(2)6/h1-2H3
86	C4H6O2	Methyl acrylate	NMOC_g		0.00601214		0.0168784	0.0136349	0.016515							0.00345346		0	1	0	4	1	1	0	0	0	0	0	0	1	0				0.0189166											InChI=1S/C4H6O2/c1-3-4(5)6-2/h3H,1H2,2H3
86	C4H6O2	Vinyl acetate	NMOC_g		0.00601214		0.00382345		0.000589822							0.456377		0	1	0	1	0	1	0	0	0	0	0	0	4	0													0.155979		InChI=1S/C4H6O2/c1-3-6-4(2)5/h3H,1H2,2H3
86	C4H6O2	Butyrolactone	NMOC_g				0.00820916									0.0209971		0	0	0	1	0	0	0	0	0	0	0	0	1	0															InChI=1S/C4H6O2/c5-4-2-1-3-6-4/h1-3H2
87	C3H5NO2	unknown	NMOC_g				0.00147069	0.00159516	0.000551175			0.00244481				0.000634932		0	0	0	1	1	1	0	0	1	0	0	0	1	0															87.03146_C3H6NO2
87	C4H9NO	C4h9no amides	NMOC_g	0.0664			0.0233656	0.0169027	0.00462423	0.0509098	0.0198146	0.028326				0.0354215	0.0111487	1	0	0	2	2	2	1	2	1	0	0	0	2	1				0.0266508	0.0153639	0.00581005		0.0073724					0.0459032		87.06788999999999_C4H9NO
88	C4H8O2	1-Hydroxy-2-butanone	NMOC_g													0.00663166		0	0	0	0	0	0	0	0	0	0	0	0	1	0															InChI=1S/C4H8O2/c1-2-4(6)3-5/h5H,2-3H2,1H3
88	C4H8O2	2-Butanone, 3-hydroxy-	NMOC_g													0.00510128		0	0	0	0	0	0	0	0	0	0	0	0	1	0															InChI=1S/C4H8O2/c1-3(5)4(2)6/h3,5H,1-2H3
88	C4H8O2	Methyl propanoate	NMOC_g		0.0365764		0.0370383	0.059747	0.0229369			0.193308				0.120503		0	2	0	6	2	2	0	0	1	0	0	0	2	0		0.0472681		0.053001	0.0714842	0.0185784							0.164212		InChI=1S/C4H8O2/c1-3-4(5)6-2/h3H2,1-2H3
88	C4H8O2	Ethyl acetate	NMOC_g	0.11	0.0643398		0.0801834	0.109967	0.0311818	0.0534211	0.0585274					0.0532671	0.0364412	1	1	0	1	1	1	1	2	0	0	0	0	2	1								0.0437032					0.0746097		InChI=1S/C4H8O2/c1-3-6-4(2)5/h3H2,1-2H3
88	C3H5Cl	3-Chloro-1-propene	NMOC_g													0.0005		0	0	0	0	0	0	0	0	0	0	0	0	1	0															InChI=1S/C3H5Cl/c1-2-3-4/h2H,1,3H2
88	C3H4O3	unknown	NMOC_g	0.0076	0.0144657		0.0127677		0.00131812	0.000913181	0.00223177						0.00199678	1	1	0	1	0	1	1	1	0	0	0	0	0	1															88.01552_C3H4O3
88	C3H4O3	Pyruvic acid	NMOC_g		0.72		0.0668123	0.0539779	0.0056156			0.00843037				0.00923377		0	1	0	5	1	2	0	0	1	0	0	0	1	0				0.113063		0.00464484									InChI=1S/C3H4O3/c1-2(4)3(5)6/h1H3,(H,5,6)
89	C2H3NO3	unknown	NMOC_g				0.00321772	0.00022788	0.000862758			0.00101164				0.00296302		0	0	0	1	1	1	0	0	1	0	0	0	1	0															89.01076_C2H3NO3
89	C3H7NO2	Nitropropanes	NMOC_g				0.00155243	0.00079758	0.000138158			0.00556404				0.000952399		0	0	0	2	1	1	0	0	1	0	0	0	1	0				0.00119864											89.04716_C3H7NO2
89	C4H11NO	C4h11no amines	NMOC_g	0.0036			0.000388916	0.00011394	0.000138158			0.00252911				0.0138385		1	0	0	1	1	1	0	0	1	0	0	0	2	0													0.0191216		89.08354_C4H11NO
90	C7H6	unknown	NMOC_g	0.0198	0.0443982		0.042763	0.0584698	0.0222231	0.0228295	0.00567367	0.0815217				0.0171786	0.0221309	1	2	0	2	2	2	1	2	1	0	0	0	2	1		0.0523233		0.00739068	0.00131543	0.0122618		0.000768483					0.00917909		90.0463599999999_C7H6
90	C2H2O4	unknown	NMOC_g				0.000306027	0.00022788	0.000135245			0.000421518				0.000211644		0	0	0	1	1	1	0	0	1	0	0	0	1	0															89.99476_C2H2O4
90	C3H6O3	unknown	NMOC_g				0.0215983	0.00900126	0.00498273			0.0235207				0.0313233		0	0	0	1	1	1	0	0	1	0	0	0	1	0															90.03116_C3H6O3
90	C3H6O3	Hydroperoxy acetone	NMOC_g				0.086											0	0	0	1	0	0	0	0	0	0	0	0	0	0															InChI=1S/C3H6O3/c1-3(4)2-6-5/h5H,2H2,1H3
90	C4H10S	Diethyl sulfide + butanethiol	NMOC_g		0.077													0	1	0	0	0	0	0	0	0	0	0	0	0	0															90.184_C4H10S
91	C6H5N	Ethylnylpyrrole	NMOC_g				0.00569107	0.00250668	0.000651152			0.0045524				0.000634932		0	0	0	2	1	1	0	0	1	0	0	0	1	0				0.00482096											91.0416599999999_C6H5N
91	C2H5NO3	Ethyl nitrate	NMOC_g	0.000878	0.00127248	0.0057	0.000860733		0.000989		0.00145	0.02275				0.0009008		1	2	1	6	0	1	0	2	2	0	0	0	3	0		0.00052677		0.000617532				0.00120208	0.0318905				0.000985188		InChI=1S/C2H5NO3/c1-2-6-3(4)5/h2H2,1H3
91	C4H13NO	unknown	NMOC_g				0.000277482	0.00045576				0.00067443				0.000211644		0	0	0	1	1	0	0	0	1	0	0	0	1	0															91.09916_C4H13NO
92	C6H4O	unknown	NMOC_g	0.0147	0.00604535		0.00817726	0.159631	0.00386712	0.0426912	0.00733296	0.0120554				0.00699673		1	1	0	2	2	2	1	1	1	0	0	0	2	0				0.00512987	0.225429	0.0039681							0.00525557		92.02566_C6H4O
92	C7H8	Heptadiyne isomers	NMOC_g						0.0044									0	0	0	0	0	1	0	0	0	0	0	0	0	0															92.062600255_C7H8
92	C7H8	1,3,5-Cycloheptatriene	NMOC_g		0.00150789											0.000816204		0	1	0	0	0	0	0	0	0	0	0	0	1	0															InChI=1S/C7H8/c1-2-4-6-7-5-3-1/h1-6H,7H2
92	C7H8	Toluene	NMOC_g	0.17275	1.53503	0.26	0.431169	0.782694	0.191152	0.177842	0.170213	0.619328			0.1445	0.187263	0.449527	5	4	4	13	5	4	1	7	7	0	0	2	14	3	0.149273	2.36952	0.0983192	0.433535	0.470902	0.126666		0.0967131	0.339918			0.0502046	0.11936	0.318652	InChI=1S/C7H8/c1-7-5-3-2-4-6-7/h2-6H,1H3
92	C7H8	C7H8 isomers	NMOC_g		0.0108294		0.00624481	0.0021								0.00142836		0	1	0	1	1	0	0	0	0	0	0	0	1	0															679.789_1.632
92	C3H8O3	unknown	NMOC_g					0.0365747	0.00498273			0.0508351						0	0	0	0	1	1	0	0	1	0	0	0	0	0															92.04675999999989_C3H8O3
92	C3H8O3	Propene hydroxyperoxide	NMOC_g	0.012			0.012701		0.023							0.022871		1	0	0	3	0	1	0	0	0	0	0	0	4	0				0.00568624									0.00518813		InChI=1S/C3H8O3/c1-3(2)7-5-4-6/h3,6H,1-2H3
93	C2H7NO3	unknown	NMOC_g		0.0025		0.00421716	0.00979884	0.000893656			0.0191369				0.00328048		0	1	0	1	1	1	0	0	1	0	0	0	1	0															93.04205999999989_C2H7NO3
93	C6H7N	2-Methyl pyridine + 3-methylpyridine	NMOC_g						0.00478132			0.106728						0	0	0	0	0	1	0	0	1	0	0	0	0	0															93.05726_C6H7N
93	C6H7N	Pyridine, 3-methyl-	NMOC_g													0.00322621		0	0	0	0	0	0	0	0	0	0	0	0	1	0															InChI=1S/C6H7N/c1-6-3-2-4-7-5-6/h2-5H,1H3
93	C6H7N	Pyridine, 2-methyl-	NMOC_g				0.0190549	0.0437123								0.00819995		0	0	0	1	1	0	0	0	0	0	0	0	1	0															InChI=1S/C6H7N/c1-6-4-2-3-5-7-6/h2-5H,1H3
93	C5H3NO	2-Furancarbonitrile + 3-furancarbonitrile	NMOC_g		0.02		0.00673513	0.0194837	0.000551175			0.0129828				0.00328048		0	1	0	2	1	1	0	0	1	0	0	0	1	0				0.00292017											93.02086_C5H3NO
94	CCl2	Dichloromethylene	NMOC_g				0.000208499											0	0	0	1	0	0	0	0	0	0	0	0	0	0															InChI=1S/CCl2/c2-1-3
94	C7H10	unknown	NMOC_g	0.0634					0.0499134	0.0292218	0.00851635	0.188334					0.0870262	1	0	0	0	0	2	1	2	1	0	0	0	0	1						0.0462096		0.00283528							94.07766_C7H10
94	C7H10	Cycloheptadiene	NMOC_g		0.0485214													0	1	0	0	0	0	0	0	0	0	0	0	0	0															InChI=1S/C7H10/c1-2-4-6-7-5-3-1/h1-4H,5-7H2
94	C7H10	C7H10 isomers	NMOC_g		0.340802		0.13195	0.890055								0.0889887		0	1	0	1	1	0	0	0	0	0	0	0	1	0															554.829_1.21
94	C6H6O	Vinylfuran	NMOC_g		0.00945855		0.00612719									0.0052033		0	1	0	1	0	0	0	0	0	0	0	0	1	0															InChI=1S/C6H6O/c1-2-6-4-3-5-7-6/h2-5H,1H2
94	C6H6O	Phenol	NMOC_g	0.427347	1.22548	0.45	0.353415	2.46241	0.307711	1.09951	0.234478	0.748577	12.57	2.0674	2.42	0.370633	0.255089	3	5	1	11	6	5	4	8	13	2	1	1	10	2	0.345829	1.37297		0.261974	2.97906	0.170692	1.48949	0.147249	0.506838	3.57796			0.297903	0.224734	InChI=1S/C6H6O/c7-6-4-2-1-3-5-6/h1-5,7H
94	C5H6N2	Methyl Diazine isomers	NMOC_g						0.022									0	0	0	0	0	1	0	0	0	0	0	0	0	0															44.037448136_C5H6N2
94	C5H6N2	3-Methylpyridazine	NMOC_g		0.00973271		0.0241468									0.0060195		0	1	0	1	0	0	0	0	0	0	0	0	1	0															InChI=1S/C5H6N2/c1-5-3-2-4-6-7-5/h2-4H,1H3
94	C5H6N2	Pyrazine, methyl-	NMOC_g													0.00346887		0	0	0	0	0	0	0	0	0	0	0	0	1	0															InChI=1S/C5H6N2/c1-5-4-6-2-3-7-5/h2-4H,1H3
94	C5H2O2	unknown	NMOC_g				0.00629424	0.00068364	0.000826034			0.00581696				0.00687843		0	0	0	1	1	1	0	0	1	0	0	0	1	0															94.00496_C5H2O2
94	C2H6S2	Dimethyl disulfide	NMOC_g		0.0039		0.0033125	0.0039879	0.000515907			0.00379367				0.00275137		0	1	0	1	1	1	0	0	1	0	0	0	1	0															InChI=1S/C2H6S2/c1-3-4-2/h1-2H3
94	CH3Br	Methyl bromide	NMOC_g	0.00223333	0.0018	0.00286667	0.0017674	0.01605	0.000521		0.00153715	0.00527737			0.0029	0.00166351	0.0022	3	1	3	5	2	1	0	4	6	0	0	1	8	1	0.00240069		0.00240069	0.0023749	0.00841457			0.00193311	0.00532521				0.00261693		InChI=1S/CH3Br/c1-2/h1H3
95	C5H3O2	unknown	NMOC_g		0.003		0.0166055	0.019028	0.00271478			0.00615417				0.0211644		0	1	0	1	1	1	0	0	1	0	0	0	1	0															95.01276_C5H3O2
95	C6H9N	2,5-Dimethyl pyrrole + 1-ethylpyrrole + other c2 substituted pyrroles	NMOC_g						0.00192547			0.0834607						0	0	0	0	0	1	0	0	1	0	0	0	0	0															95.07296_C6H9N
95	C6H9N	C2 pyrrole	NMOC_g		0.0021											0.00175813		0	1	0	0	0	0	0	0	0	0	0	0	1	0															InChI=1S/C6H9N/c1-2-6-4-3-5-7-6/h3-5,7H,2H2,1H3
95	C6H9N	1H-pyrrole, 1-ethyl-	NMOC_g				0.00789406									0.00255728		0	0	0	1	0	0	0	0	0	0	0	0	1	0															InChI=1S/C6H9N/c1-2-7-5-3-4-6-7/h3-6H,2H2,1H3
95	C6H9N	1H-pyrrole, 2,5-dimethyl-	NMOC_g				0.00751209	0.0158443								0.00191796		0	0	0	1	1	0	0	0	0	0	0	0	1	0															InChI=1S/C6H9N/c1-5-3-4-6(2)7-5/h3-4,7H,1-2H3
95	C6H9N	1H-pyrrole, 2,4-dimethyl-	NMOC_g													0.00223762		0	0	0	0	0	0	0	0	0	0	0	0	1	0															InChI=1S/C6H9N/c1-5-3-6(2)7-4-5/h3-4,7H,1-2H3
95	C5H5NO	4-Pyridinol	NMOC_g				0.0161616	0.0339541	0.0048297			0.108499				0.0103706		0	0	0	1	1	1	0	0	1	0	0	0	1	0															InChI=1S/C5H5NO/c7-5-1-3-6-4-2-5/h1-4H,(H,6,7)
95	C5H5NO	Pyridinol	NMOC_g		0.0022													0	1	0	0	0	0	0	0	0	0	0	0	0	0															InChI=1S/C5H5NO/c7-5-3-1-2-4-6-5/h1-4H,(H,6,7)
96	C6H8O	2,5-Dimethyl furan + 2-ethylfuran + other c2 substituted furans	NMOC_g			0.24						0.57394			0.307			0	0	1	0	0	0	0	0	1	0	0	1	0	0															96.05696_C6H8O
96	C6H8O	2,4-Hexadienal, (e,e)-	NMOC_g													0.00927412		0	0	0	0	0	0	0	0	0	0	0	0	1	0															InChI=1S/C6H8O/c1-2-3-4-5-6-7/h2-6H,1H3/b3-2+,5-4+
96	C6H8O	Furan, 3-ethyl-	NMOC_g		0.00205621		0.00335033									0.00110406		0	1	0	1	0	0	0	0	0	0	0	0	1	0															InChI=1S/C6H8O/c1-2-6-3-4-7-5-6/h3-5H,2H2,1H3
96	C6H8O	2-Ethylfuran	NMOC_g		0.0482293		0.0259942	0.0193619	0.0170316							0.0150152	0.0159273	0	2	0	5	1	1	0	0	0	0	0	0	1	1		0.0548301		0.0167515											InChI=1S/C6H8O/c1-2-6-4-3-5-7-6/h3-5H,2H2,1H3
96	C6H8O	2-Cyclopenten-1-one, 3-methyl-	NMOC_g													0.010599		0	0	0	0	0	0	0	0	0	0	0	0	1	0															InChI=1S/C6H8O/c1-5-2-3-6(7)4-5/h4H,2-3H2,1H3
96	C6H8O	2-Cyclopenten-1-one, 2-methyl-	NMOC_g		0.00822483		0.0296566	0.0354697								0.0567488		0	1	0	1	1	0	0	0	0	0	0	0	1	0															InChI=1S/C6H8O/c1-5-3-2-4-6(5)7/h3H,2,4H2,1H3
96	C6H8O	2,5-Dimethylfuran	NMOC_g	0.2738	0.128964		0.0853534	0.145774	0.0664685							0.160742	0.053081	1	2	0	6	2	2	0	0	0	0	0	0	2	1		0.108909		0.0484839	0.0514774	0.0315744							0.0890268		InChI=1S/C6H8O/c1-5-3-4-6(2)7-5/h3-4H,1-2H3
96	C6H8O	Furan, 2,3-dimethyl-	NMOC_g		0.00479782											0.00397462		0	1	0	0	0	0	0	0	0	0	0	0	1	0															InChI=1S/C6H8O/c1-5-3-4-7-6(5)2/h3-4H,1-2H3
96	C6H8O	Furan, 2,4-dimethyl-	NMOC_g		0.00849899		0.018737	0.0556452								0.00817006		0	1	0	1	1	0	0	0	0	0	0	0	1	0															InChI=1S/C6H8O/c1-5-3-6(2)7-4-5/h3-4H,1-2H3
96	C6H8O	2-Cyclohexen-1-one	NMOC_g													0.0052995		0	0	0	0	0	0	0	0	0	0	0	0	1	0															InChI=1S/C6H8O/c7-6-4-2-1-3-5-6/h2,4H,1,3,5H2
96	C5H4O2	3-Furaldehyde	NMOC_g		0.0228924		0.0277955		0.008252							0.0154917		0	1	0	5	0	1	0	0	0	0	0	0	1	0				0.0181502											InChI=1S/C5H4O2/c6-3-5-1-2-7-4-5/h1-4H
96	C5H4O2	2-Cyclopentene-1,4-dione	NMOC_g		0.0168609		0.0102937									0.00929501		0	1	0	1	0	0	0	0	0	0	0	0	1	0															InChI=1S/C5H4O2/c6-4-1-2-5(7)3-4/h1-2H,3H2
96	C5H4O2	Cyclopentenedione	NMOC_g				0.0142275		0.00475539							0.00701203		0	0	0	3	0	1	0	0	0	0	0	0	1	0				0.00486861											InChI=1S/C5H4O2/c6-4-2-1-3-5(4)7/h1-2H,3H2
96	C5H4O2	2-Furaldehyde	NMOC_g	0.7974	0.535682	0.29	0.575148	1.08515	0.369076	0.567314	0.235336	0.740851				0.523969	0.300016	2	3	1	12	3	3	1	4	3	0	0	0	5	1	1.10365	0.209975		0.635887	0.991873	0.266287		0.230961	0.850117				0.332328		InChI=1S/C5H4O2/c6-4-5-2-1-3-7-5/h1-4H
96	C7H12	C7H12 isomers	NMOC_g	0.0156						0.0787618	0.0211143	0.185721					0.1035	1	0	0	0	0	0	1	2	1	0	0	0	0	1								0.0276278							96.093377_C7H12
96	C7H12	Cycloheptene	NMOC_g		0.0181028													0	1	0	0	0	0	0	0	0	0	0	0	0	0															InChI=1S/C7H12/c1-2-4-6-7-5-3-1/h1-2H,3-7H2
96	C7H12	Vinylcyclopentane	NMOC_g		0.00642945		0.00634318	0.00672271								0.00238843		0	1	0	1	1	0	0	0	0	0	0	0	1	0															InChI=1S/C7H12/c1-2-7-5-3-4-6-7/h2,7H,1,3-6H2
96	C7H12	Cyclopentane, ethylidene-	NMOC_g					0.00584584								0.00159229		0	0	0	0	1	0	0	0	0	0	0	0	1	0															InChI=1S/C7H12/c1-2-7-5-3-4-6-7/h2H,3-6H2,1H3
96	C7H12	Cyclopentene, 3-ethyl-	NMOC_g		0.00180476		0.0038393	0.00945077								0.00636915		0	1	0	1	1	0	0	0	0	0	0	0	1	0															InChI=1S/C7H12/c1-2-7-5-3-4-6-7/h3,5,7H,2,4,6H2,1H3
96	C7H12	1,6-Heptadiene	NMOC_g		0.0108286		0.0119352	0.00789188								0.00199036		0	1	0	1	1	0	0	0	0	0	0	0	1	0															InChI=1S/C7H12/c1-3-5-7-6-4-2/h3-4H,1-2,5-7H2
96	C7H12	3,5-Dimethylcyclopentene	NMOC_g		0.0042863		0.00509124	0.0160761								0.00796144		0	1	0	1	1	0	0	0	0	0	0	0	1	0															InChI=1S/C7H12/c1-6-3-4-7(2)5-6/h3-4,6-7H,5H2,1-2H3
96	C7H12	Cyclopentene, 4,4-dimethyl-	NMOC_g		0.00710624		0.00776205	0.0362442								0.00676723		0	1	0	1	1	0	0	0	0	0	0	0	1	0															InChI=1S/C7H12/c1-7(2)5-3-4-6-7/h3-4H,5-6H2,1-2H3
96	C7H12	Cyclohexene, 4-methyl-	NMOC_g		0.0042863		0.004507	0.00779445										0	1	0	1	1	0	0	0	0	0	0	0	0	0															InChI=1S/C7H12/c1-7-5-3-2-4-6-7/h2-3,7H,4-6H2,1H3
96	C7H12	Cyclohexene, 3-methyl-	NMOC_g		0.00812141		0.0112675	0.0161735								0.0099518		0	1	0	1	1	0	0	0	0	0	0	0	1	0															InChI=1S/C7H12/c1-7-5-3-2-4-6-7/h3,5,7H,2,4,6H2,1H3
96	C7H12	1-Methylcyclohexene	NMOC_g		0.00642945		0.00912902	0.0294241	0.0121448							0.00636915		0	1	0	4	1	1	0	0	0	0	0	0	1	0				0.00172661											InChI=1S/C7H12/c1-7-5-3-2-4-6-7/h5H,2-4,6H2,1H3
96	C7H12	C7H12 isomers	NMOC_g		0.0412839		0.0778709	0.0928514								0.0493609		0	1	0	1	1	0	0	0	0	0	0	0	1	0															394.88_1.069
96	CH2Cl2	Methylene chloride	NMOC_g				0.0021				0.0003	0.00045				0.00436667		0	0	0	2	0	0	0	2	2	0	0	0	3	0				0.00113137				0.000141421	7.07107e-05				0.00446132		InChI=1S/CH2Cl2/c2-1-3/h1H2
97	C6H11N	Hexanenitrile	NMOC_g		0.004													0	1	0	0	0	0	0	0	0	0	0	0	0	0															InChI=1S/C6H11N/c1-2-3-4-5-6-7/h2-5H2,1H3
97	C6H11N	4-Methylpentanenitrile	NMOC_g		0.00520906		0.00688589	0.0112801	0.000482096			0.0215817				0.00312341		0	1	0	3	1	1	0	0	1	0	0	0	2	0				0.00178451									0.000521448		InChI=1S/C6H11N/c1-6(2)4-3-5-7/h6H,3-4H2,1-2H3
97	C5H7NO	unknown	NMOC_g				0.00892764	0.0096849	0.00134485			0.0708994				0.00825412		0	0	0	1	1	1	0	0	1	0	0	0	1	0															97.05216_C5H7NO
97	C4H3NO2	unknown	NMOC_g		0.003		0.0115467	0.0198256	0.00306454			0.0314453				0.0100531		0	1	0	1	1	1	0	0	1	0	0	0	1	0															97.01586_C4H3NO2
98	C7H14	unknown	NMOC_g				0.0230032	0.0354353	0.00275879									0	0	0	1	1	1	0	0	0	0	0	0	0	0															98.10896_C7H14
98	C7H14	Cyclopentane, ethyl-	NMOC_g				0.00566476	0.0214								0.000505902		0	0	0	1	1	0	0	0	0	0	0	0	1	0															InChI=1S/C7H14/c1-2-7-5-3-4-6-7/h7H,2-6H2,1H3
98	C7H14	2-Heptene, (e)-	NMOC_g		0.00589446		0.0179191	0.054										0	1	0	1	1	0	0	0	0	0	0	0	0	0															InChI=1S/C7H14/c1-3-5-7-6-4-2/h3,5H,4,6-7H2,1-2H3/b5-3+
98	C7H14	2-Heptene, z	NMOC_g		0.00397533		0.00554916	0.0282								0.000379426		0	1	0	1	1	0	0	0	0	0	0	0	1	0															InChI=1S/C7H14/c1-3-5-7-6-4-2/h3,5H,4,6-7H2,1-2H3/b5-3-
98	C7H14	1-Heptene	NMOC_g	0.034	0.0847157		0.0359566	0.1517	0.0292							0.0213072		1	1	0	9	2	2	0	0	0	0	0	0	4	0				0.0252155	0.102813	0.0328098							0.00646866		InChI=1S/C7H14/c1-3-5-7-6-4-2/h3H,1,4-7H2,2H3
98	C7H14	3-Heptene, (e)-	NMOC_g		0.000822483		0.00219654	0.0162								0.000126475		0	1	0	1	1	0	0	0	0	0	0	0	1	0															InChI=1S/C7H14/c1-3-5-7-6-4-2/h5,7H,3-4,6H2,1-2H3/b7-5+
98	C7H14	1-Hexene, 5-methyl-	NMOC_g				0.00254336	0.0065								0.000505902		0	0	0	1	1	0	0	0	0	0	0	0	1	0															InChI=1S/C7H14/c1-4-5-6-7(2)3/h4,7H,1,5-6H2,2-3H3
98	C7H14	2-Hexene, 5-methyl-, (e)-	NMOC_g					0.0045										0	0	0	0	1	0	0	0	0	0	0	0	0	0															InChI=1S/C7H14/c1-4-5-6-7(2)3/h4-5,7H,6H2,1-3H3/b5-4+
98	C7H14	1-Hexene, 3-methyl-	NMOC_g				0.00184972	0.0071								0.000379426		0	0	0	1	1	0	0	0	0	0	0	0	1	0															InChI=1S/C7H14/c1-4-6-7(3)5-2/h5,7H,2,4,6H2,1,3H3
98	C7H14	3-Methyl-2-hexene (e)	NMOC_g		0.0013708		0.00184972	0.0045								0.000885328		0	1	0	1	1	0	0	0	0	0	0	0	1	0															InChI=1S/C7H14/c1-4-6-7(3)5-2/h5H,4,6H2,1-3H3/b7-5+
98	C7H14	(z)-3-methyl-2-hexene	NMOC_g		0.00328993		0.00300579									0.00189713		0	1	0	1	0	0	0	0	0	0	0	0	1	0															InChI=1S/C7H14/c1-4-6-7(3)5-2/h5H,4,6H2,1-3H3/b7-5-
98	C7H14	1-Butene, 2-ethyl, 3-methyl	NMOC_g		0.0049349		0.00647402	0.0165								0.00265598		0	1	0	1	1	0	0	0	0	0	0	0	1	0															InChI=1S/C7H14/c1-5-7(4)6(2)3/h6H,4-5H2,1-3H3
98	C7H14	1-Pentene, 2,3-dimethyl-	NMOC_g													0.000505902		0	0	0	0	0	0	0	0	0	0	0	0	1	0															InChI=1S/C7H14/c1-5-7(4)6(2)3/h7H,2,5H2,1,3-4H3
98	C7H14	Methylcyclohexane	NMOC_g	0.01			0.00714408	0.017	0.0024		0.00965931	0.0279898				0.0103534	0.0276	1	0	0	9	1	2	0	1	4	0	0	0	4	1				0.00569997		0.000565685			0.0356565				0.0157802		InChI=1S/C7H14/c1-7-5-3-2-4-6-7/h7H,2-6H2,1H3
98	C7H14	C7H14 isomers	NMOC_g													0.000505902		0	0	0	0	0	0	0	0	0	0	0	0	1	0															579.821_1.052
98	C6H10O	Methyl cyclopentanone + cyclohexanone + other ketones	NMOC_g		0.0335166				0.0142506			0.0561463					0.0207998	0	2	0	0	0	2	0	0	1	0	0	0	0	1		0.0261864				0.0127015									98.07256_C6H10O
98	C6H10O	4-Hexen-2-one	NMOC_g													0.000684634		0	0	0	0	0	0	0	0	0	0	0	0	1	0															InChI=1S/C6H10O/c1-3-4-5-6(2)7/h3-4H,5H2,1-2H3/b4-3+
98	C6H10O	5-Hexen-2-one	NMOC_g				0.00291367									0.00102695		0	0	0	1	0	0	0	0	0	0	0	0	1	0															InChI=1S/C6H10O/c1-3-4-5-6(2)7/h3H,1,4-5H2,2H3
98	C6H10O	3-Hexen-2-one	NMOC_g													0.00114106		0	0	0	0	0	0	0	0	0	0	0	0	1	0															InChI=1S/C6H10O/c1-3-4-5-6(2)7/h4-5H,3H2,1-2H3/b5-4+
98	C6H10O	5-Hexen-3-one	NMOC_g													0.000570528		0	0	0	0	0	0	0	0	0	0	0	0	1	0															InChI=1S/C6H10O/c1-3-5-6(7)4-2/h3H,1,4-5H2,2H3
98	C6H10O	1-Hexen-3-one	NMOC_g													0.000684634		0	0	0	0	0	0	0	0	0	0	0	0	1	0															InChI=1S/C6H10O/c1-3-5-6(7)4-2/h4H,2-3,5H2,1H3
98	C6H10O	2-Pentanone, 3-methylene-	NMOC_g													0.00102695		0	0	0	0	0	0	0	0	0	0	0	0	1	0															InChI=1S/C6H10O/c1-4-5(2)6(3)7/h2,4H2,1,3H3
98	C6H10O	4-Penten-2-one, 3-methyl-	NMOC_g				0.00242806									0.000912846		0	0	0	1	0	0	0	0	0	0	0	0	1	0															InChI=1S/C6H10O/c1-4-5(2)6(3)7/h4-5H,1H2,2-3H3
98	C6H10O	3-Penten-2-one, 3-methyl-	NMOC_g				0.00194245											0	0	0	1	0	0	0	0	0	0	0	0	0	0															InChI=1S/C6H10O/c1-4-5(2)6(3)7/h4H,1-3H3
98	C6H10O	1-Penten-3-one, 2-methyl-	NMOC_g													0.0019398		0	0	0	0	0	0	0	0	0	0	0	0	1	0															InChI=1S/C6H10O/c1-4-6(7)5(2)3/h2,4H2,1,3H3
98	C6H10O	3-Penten-2-one, 4-methyl-	NMOC_g													0.000684634		0	0	0	0	0	0	0	0	0	0	0	0	1	0															InChI=1S/C6H10O/c1-5(2)4-6(3)7/h4H,1-3H3
98	C6H10O	3-Methylcyclopentanone	NMOC_g													0.00376549		0	0	0	0	0	0	0	0	0	0	0	0	1	0															InChI=1S/C6H10O/c1-5-2-3-6(7)4-5/h5H,2-4H2,1H3
98	C6H10O	Cyclopentanone, 2-methyl-	NMOC_g				0.0131115									0.00901435		0	0	0	1	0	0	0	0	0	0	0	0	1	0															InChI=1S/C6H10O/c1-5-3-2-4-6(5)7/h5H,2-4H2,1H3
98	C6H10O	Cyclohexanone	NMOC_g				0.00687949	0.0504969								0.0019398		0	0	0	1	1	0	0	0	0	0	0	0	1	0															InChI=1S/C6H10O/c7-6-4-2-1-3-5-6/h1-5H2
98	C6H10O	4-Hexen-3-one isomers	NMOC_g													0.00308085		0	0	0	0	0	0	0	0	0	0	0	0	1	0															859.731_2.187
98	C3H2N2S	unknown	NMOC_g				0.0168774	0.0200534	0.00357899			0.0234364				0.0179898		0	0	0	1	1	1	0	0	1	0	0	0	1	0															97.99325999999989_C3H2N2S
98	C5H6S	Methyl thiophenes	NMOC_g						0.00567935			0.0553875						0	0	0	0	0	1	0	0	1	0	0	0	0	0															98.01846_C5H6S
98	C5H6S	Thiophene, 3-methyl-	NMOC_g													0.0139798		0	0	0	0	0	0	0	0	0	0	0	0	1	0															InChI=1S/C5H6S/c1-5-2-3-6-4-5/h2-4H,1H3
98	C5H6S	Thiophene, 2-methyl-	NMOC_g				0.017697	0.0195295								0.0186397		0	0	0	1	1	0	0	0	0	0	0	0	1	0															InChI=1S/C5H6S/c1-5-3-2-4-6-5/h2-4H,1H3
98	C5H6O2	2-Furanmethanol + other hco2	NMOC_g		0.058							0.761347						0	1	0	0	0	0	0	0	1	0	0	0	0	0															98.03626_C5H6O2
98	C5H6O2	2(3H)-furanone, 5-methyl-	NMOC_g				0.00388698											0	0	0	1	0	0	0	0	0	0	0	0	0	0															InChI=1S/C5H6O2/c1-4-2-3-5(6)7-4/h2H,3H2,1H3
98	C5H6O2	2-Furan methanol	NMOC_g	0.8636	0.250942		0.325204	0.32971	0.150368	0.177157	0.0615633					0.53725	0.237949	1	2	0	3	1	1	1	1	0	0	0	0	2	1		0.270749		0.234591									0.236691		InChI=1S/C5H6O2/c6-4-5-2-1-3-7-5/h1-3,6H,4H2
98	C4H2O3	unknown	NMOC_g				0.0206425	0.0516148	0.0168063			0.00295063				0.00380959		0	0	0	1	1	1	0	0	1	0	0	0	1	0															97.99986_C4H2O3
98	C4H2O3	Maleic anhydride	NMOC_g	0.109	0.07		0.097175		0.146							0.063		1	1	0	4	0	1	0	0	0	0	0	0	4	0				0.0350817									0.0120277		InChI=1S/C4H2O3/c5-3-1-2-4(6)7-3/h1-2H
99	C5H9NO	unknown	NMOC_g				0.00427372	0.00877338	0.000552631			0.0448496				0.00264555		0	0	0	1	1	1	0	0	1	0	0	0	1	0															99.06815999999999_C5H9NO
99	C6H11O	unknown	NMOC_g				0.00214274	0.00330426	0.000413017			0.00362506				0.00232809		0	0	0	1	1	1	0	0	1	0	0	0	1	0															99.08015999999999_C6H12O
99	C6H13N	unknown	NMOC_g				0.00125404	0.00182304	0.000138158			0.01332				0.00126986		0	0	0	1	1	1	0	0	1	0	0	0	1	0															99.10416_C6H13N
99	C4H5NO2	unknown	NMOC_g				0.0145087	0.041702	0.00223123			0.0692976				0.00804248		0	0	0	1	1	1	0	0	1	0	0	0	1	0															99.03116_C4H5NO2
100	C5H8O2	Methyl methacrylate + other hco2	NMOC_g	0.199						0.0961123	0.0961567	0.229222					0.07022	1	0	0	0	0	0	1	2	1	0	0	0	0	1								0.0592473							100.05216_C5H8O2
100	C5H8O2	2-Butenoic acid, methyl ester	NMOC_g													0.00568473		0	0	0	0	0	0	0	0	0	0	0	0	1	0															InChI=1S/C5H8O2/c1-3-4-5(6)7-2/h3-4H,1-2H3/b4-3+
100	C5H8O2	Unsaturated c5 carboxylic acids	NMOC_g		0.0461054		0.00744238									0.0078165		0	2	0	1	0	0	0	0	0	0	0	0	1	0		0.0474222													InChI=1S/C5H8O2/c1-3-4-7-5(2)6/h3H,1,4H2,2H3
100	C5H8O2	2,3-Pentanedione	NMOC_g		0.0172571		0.0319239	0.0825766								0.109431		0	1	0	1	1	0	0	0	0	0	0	0	1	0															InChI=1S/C5H8O2/c1-3-5(7)4(2)6/h3H2,1-2H3
100	C5H8O2	Methyl methacrylate	NMOC_g		0.00409188		0.0644666		0.0431479							0.00278593		0	1	0	5	0	1	0	0	0	0	0	0	1	0				0.0426179											InChI=1S/C5H8O2/c1-4(2)5(6)7-3/h1H2,2-3H3
100	C6H12O	Other substituted furans	NMOC_g				0.010471		0.00041593			0.0118868						0	0	0	2	0	1	0	0	1	0	0	0	0	0				0.00357654											100.0888_C6H12O
100	C6H12O	N-hexanal	NMOC_g		0.00935948	0.61	0.0534753	0.00727876	0.0163						0.017	0.00149247	0.143164	0	1	1	4	1	1	0	0	0	0	0	1	1	1				0.070563											InChI=1S/C6H12O/c1-2-3-4-5-6-7/h6H,2-5H2,1H3
100	C6H12O	2-Hexanone	NMOC_g		0.00245805		0.0100724	0.00734743	0.0153							0.00250963		0	1	0	4	1	1	0	0	0	0	0	0	5	0				0.00280593									0.00199741		InChI=1S/C6H12O/c1-3-4-5-6(2)7/h3-5H2,1-2H3
100	C6H12O	3-Hexanone	NMOC_g				0.0398667		0.033							0.00198996		0	0	0	3	0	1	0	0	0	0	0	0	1	0				0.0120952											InChI=1S/C6H12O/c1-3-5-6(7)4-2/h3-5H2,1-2H3
100	C6H12O	2-Pentanone, 3-methyl-	NMOC_g					0.0138709								0.000895481		0	0	0	0	1	0	0	0	0	0	0	0	1	0															InChI=1S/C6H12O/c1-4-5(2)6(3)7/h5H,4H2,1-3H3
100	C6H12O	3-Pentanone, 2-methyl-	NMOC_g					0.00439473								0.000298494		0	0	0	0	1	0	0	0	0	0	0	0	1	0															InChI=1S/C6H12O/c1-4-6(7)5(2)3/h5H,4H2,1-3H3
100	C6H12O	4-Methyl-2-pentanone	NMOC_g				0.00497112	0.00755343								0.00178915		0	0	0	1	1	0	0	0	0	0	0	0	5	0													0.000978254		InChI=1S/C6H12O/c1-5(2)4-6(3)7/h5H,4H2,1-3H3
100	C7H16	unknown	NMOC_g				0.00681483	0.00603882	0.00113762			0.0112967						0	0	0	1	1	1	0	0	1	0	0	0	0	0															100.12416_C7H16
100	C7H16	N-heptane	NMOC_g	0.024	0.0231035	0.0056	0.023018	0.232367	0.01455		0.00425994	0.0429998				0.0118654	0.231	2	2	1	10	3	2	0	4	6	0	0	0	9	1	0.0240416	0.00126781		0.0141369	0.143382	0.0092631		0.00521229	0.0601347				0.0183518		InChI=1S/C7H16/c1-3-5-7-6-4-2/h3-7H2,1-2H3
100	C7H16	Hexane, 2-methyl-	NMOC_g	0.007	0.000411241		0.00803249	0.1089								0.00582721		1	1	0	5	2	0	0	0	0	0	0	0	3	0				0.00856008	0.142977								0.00650302		InChI=1S/C7H16/c1-4-5-6-7(2)3/h7H,4-6H2,1-3H3
100	C7H16	Hexane, 3-methyl-	NMOC_g	0.013			0.0097	0.18555								0.00424184		1	0	0	4	2	0	0	0	0	0	0	0	2	0				0.00779487	0.248124								0.000707107		InChI=1S/C7H16/c1-4-6-7(3)5-2/h7H,4-6H2,1-3H3
100	C7H16	Pentane, 2,3-dimethyl-	NMOC_g	0.004	0.00123372		0.00217307	0.0075								0.00919613		1	1	0	5	1	0	0	0	0	0	0	0	1	0				0.00105611											InChI=1S/C7H16/c1-5-7(4)6(2)3/h6-7H,5H2,1-4H3
100	C7H16	Pentane, 2,4-dimethyl-	NMOC_g	0.006			0.0121417		0.015							0.0102173		1	0	0	6	0	1	0	0	0	0	0	0	3	0				0.0120012									0.00152753		InChI=1S/C7H16/c1-6(2)5-7(3)4/h6-7H,5H2,1-4H3
100	C4H4O3	unknown	NMOC_g	0.063	0.043397					0.0146109	0.00869523						0.00715512	1	1	0	0	0	0	1	2	0	0	0	0	0	1								0.00866926							100.01552_C4H4O3
100	C4H4O3	Dihydro furandione	NMOC_g				0.0659656	0.126794	0.0107682			0.0528584				0.0533129		0	0	0	2	1	1	0	0	1	0	0	0	1	0				0.00898495											InChI=1S/C4H4O3/c5-3-1-2-4(6)7-3/h1-2H2
101	C4H7NO2	unknown	NMOC_g				0.00201698	0.00136728	0.000241048			0.00961062				0.011323		0	0	0	1	1	1	0	0	1	0	0	0	1	0															101.04716_C4H8NO2
101	C3H3NO3	unknown	NMOC_g				0.00102682	0.00079758	0.00020578			0.00202329				0.000952399		0	0	0	1	1	1	0	0	1	0	0	0	1	0															101.01116_C3H3NO3
101	C5H11NO	unknown	NMOC_g				0.0055763	0.00877338	0.000549718			0.0295063				0.00444453		0	0	0	1	1	1	0	0	1	0	0	0	1	0															101.08315999999999_C5H11NO
102	C4H6O3	Methyl pyruvate	NMOC_g	0.1389	0.407312		0.101441	0.106433	0.0349714	0.130585	0.0445939					0.0747319	0.0384379	1	1	0	1	1	1	1	2	0	0	0	0	1	1								0.022603							InChI=1S/C4H6O3/c1-3(5)4(6)7-2/h1-2H3
102	C4H6O3	Acetic anhydride	NMOC_g		0.0280886		0.0573157	0.0186862	0.0284026			0.20157				0.133619		0	2	0	3	1	1	0	0	1	0	0	0	2	0		0.00632836		0.0646438									0.178288		InChI=1S/C4H6O3/c1-3(5)7-4(2)6/h1-2H3
102	C5H10O2	unknown	NMOC_g	0.0044				0.10544				0.152252					0.0128126	1	0	0	0	2	0	0	0	1	0	0	0	0	1					0.0622629										102.06716_C5H10O2
102	C5H10O2	Valeric acid	NMOC_g		0.0301361													0	1	0	0	0	0	0	0	0	0	0	0	0	0															InChI=1S/C5H10O2/c1-2-3-4-5(6)7/h2-4H2,1H3,(H,6,7)
102	C5H10O2	Methyl butanoate	NMOC_g				0.0138297		0.00616363							0.0184743		0	0	0	4	0	1	0	0	0	0	0	0	1	0				0.00630672											InChI=1S/C5H10O2/c1-3-4-5(6)7-2/h3-4H2,1-2H3
102	C8H6	Phenylacetylene	NMOC_g	0.0275	0.0364634		0.036544	0.00865944	0.0298124	0.144739		0.00640708				0.0483367		2	1	0	9	1	4	1	0	1	0	0	0	5	0	0.0304056			0.0620446		0.0257558							0.0854404		InChI=1S/C8H6/c1-2-8-6-4-3-5-7-8/h1,3-7H
102	C6H14O	unknown	NMOC_g				0.00619005	0.00125334	0.00083186			0.0124769				0.0165082		0	0	0	1	1	1	0	0	1	0	0	0	1	0															102.10416_C6H14O
103	C7H5N	Benzonitrile	NMOC_g	0.073	0.0442555		0.0478646	0.0946379	0.0304694			0.0776437				0.0319071		1	3	0	10	2	4	0	0	1	0	0	0	7	0		0.0191812		0.0267974	0.0438942	0.0185295							0.021739		InChI=1S/C7H5N/c8-6-7-4-2-1-3-5-7/h1-5H
103	C3H5NO3	Propanone nitrate	NMOC_g				0.004											0	0	0	1	0	0	0	0	0	0	0	0	0	0															InChI=1S/C3H6NO4/c1-3(5)2-8-4(6)7/h2H2,1H3,(H,6,7)/q+1
103	C4H9NO2	unknown	NMOC_g		0.003													0	1	0	0	0	0	0	0	0	0	0	0	0	0															103.121_C4H9NO2
103	C5H13NO	unknown	NMOC_g				0.00120398	0.00558306	0.000208693			0.00522683				0.00105822		0	0	0	1	1	1	0	0	1	0	0	0	1	0															103.09916_C5H13NO
104	C8H8	Styrene	NMOC_g	0.1067	0.110461		0.0836935	0.0790832	0.0636988	0.143598	0.0314773	0.0979589				0.0404346	1.52347	2	3	0	12	4	3	1	7	7	0	0	0	12	3	0.107904	0.0630113		0.0366787	0.0374503	0.0306446		0.0249897	0.107727				0.034001	1.77426	InChI=1S/C8H8/c1-2-8-6-4-3-5-7-8/h2-7H,1H2
104	C8H8	C8H8 isomers	NMOC_g		0.00260453		0.00184972									0.000204051		0	1	0	1	0	0	0	0	0	0	0	0	1	0															1219.62_1.888
104	C7H4O	unknown	NMOC_g				0.0127908	0.0752004	0.00261917			0.029422				0.00857159		0	0	0	1	1	1	0	0	1	0	0	0	1	0															104.02516_C7H4O
104	C4H8OS	Oxathiane	NMOC_g		0.0031													0	1	0	0	0	0	0	0	0	0	0	0	0	0															InChI=1S/C4H8OS/c1-3-6-4-2-5-1/h1-4H2
104	C5H12O2	1,5-Pentanediol	NMOC_g		0.0029													0	1	0	0	0	0	0	0	0	0	0	0	0	0															InChI=1S/C5H12O2/c6-4-2-1-3-5-7/h6-7H,1-5H2
104	C3H4O4	unknown	NMOC_g				0.00193326	0.0022788	0.000310127							0.00105822		0	0	0	1	1	1	0	0	0	0	0	0	1	0															104.01016_C3H4O4
104	C4H8O3	C4-dihydroxycarbonyls	NMOC_g				0.047											0	0	0	1	0	0	0	0	0	0	0	0	0	0															104.09133999999999_C2H4O3
105	C7H7N	Vinylpyridine	NMOC_g				0.00629846	0.00558306	0.00106562			0.0135729				0.00137569		0	0	0	2	1	1	0	0	1	0	0	0	1	0				0.00311345											InChI=1S/C7H7N/c1-2-7-5-3-4-6-8-7/h2-6H,1H2
105	C2H3NO4	Ethanal nitrate	NMOC_g				0.0027											0	0	0	1	0	0	0	0	0	0	0	0	0	0															InChI=1S/C2H3NO4/c1-2(4)7-3(5)6/h1H3
105	C3H7NO3	N-propyl nitrate	NMOC_g	0.000399	0.000305621	0.0003	0.000290574		0.000234		0.0001	0.00095				0.0001424		1	2	1	7	0	1	0	2	2	0	0	0	3	0		0.00014937		0.000146198				0	0.00120208				0.000116385		InChI=1S/C3H7NO3/c1-2-3-7-4(5)6/h2-3H2,1H3
105	C3H7NO3	Isopropyl nitrate	NMOC_g		0.0016	0.001	0.0016998				0.0003	0.00305						0	1	1	3	0	0	0	2	2	0	0	0	0	0				0.000360473				0.000141421	0.00403051						InChI=1S/C3H7NO3/c1-3(2)7-4(5)6/h3H,1-2H3
105	C5H15NO	unknown	NMOC_g				0.000420681	0.00068364				0.00134886				0.000211644		0	0	0	1	1	0	0	0	1	0	0	0	1	0															105.11516_C5H15NO
105	C8H9	unknown	NMOC_g				0.00128741	0.00319032	0.000276316			0.00126456				0.000846576		0	0	0	1	1	1	0	0	1	0	0	0	1	0															105.07016_C8H10
106	C8H10	Ethyl benzene + m-xylene + p-xylene + o-xylene	NMOC_g							0.16209								0	0	0	0	0	0	1	0	0	0	0	0	0	0															106.07816_C8H10
106	C8H10	Ethylbenzene	NMOC_g	0.0447538	0.0689565	0.0470238	0.04864	0.133173	0.0300861		0.0214296	0.140682			0.0486762	0.0253001	0.249386	1	2	3	10	3	2	0	5	6	0	0	2	11	2		0.0430009	0.03	0.0218166	0.0826183	0.0177484		0.0127166	0.149838			0.0417193	0.016962	0.254106	InChI=1S/C8H10/c1-2-8-6-4-3-5-7-8/h3-7H,2H2,1H3
106	C8H10	P-xylene	NMOC_g	0.00149179		0.0230159									0.00839713			1	0	2	0	0	0	0	0	0	0	0	1	0	0			0.00707107												InChI=1S/C8H10/c1-7-3-5-8(2)6-4-7/h3-6H,1-2H3
106	C8H10	M-xylene	NMOC_g	0.00539887		0.0368254									0.0209928			1	0	2	0	0	0	0	0	0	0	0	1	0	0			0.0141421												InChI=1S/C8H10/c1-7-4-3-5-8(2)6-7/h3-6H,1-2H3
106	C8H10	O-xylene	NMOC_g	0.0128704	0.0603913	0.0230159	0.0425532	0.193755	0.0233699		0.0175262	0.0970379			0.0125957	0.0206516	0.102881	2	2	2	10	3	2	0	5	6	0	0	1	11	2	0.0170413	0.0304396	0.00707107	0.0247984	0.0958802	0.0132936		0.0139526	0.0964405				0.0184356	0.129657	InChI=1S/C8H10/c1-7-5-3-4-6-8(7)2/h3-6H,1-2H3
106	C8H10	C8H10 isomers	NMOC_g		0.00479782		0.0062428									0.000612153		0	1	0	1	0	0	0	0	0	0	0	0	1	0															1039.67_1.641
106	C4H10O3	unknown	NMOC_g				0.00891962	0.0252947	0.00127141			0.0284103				0.0062435		0	0	0	1	1	1	0	0	1	0	0	0	1	0															106.06215999999999_C4H10O3
106	C4H10O3	Diethylene glycol	NMOC_g		0.0036													0	1	0	0	0	0	0	0	0	0	0	0	0	0															InChI=1S/C4H10O3/c5-1-3-7-4-2-6/h5-6H,1-4H2
106	C7H6O	Benzaldehyde	NMOC_g	0.1211	0.0866149		0.161684	0.051424	0.115097	0.0698583	0.0215386	0.0875072				0.0788387	0.421692	2	3	0	11	3	3	1	2	1	0	0	0	7	2	0.101682	0.0533206		0.145075	0.0191301	0.11242		0.018461					0.0500357	0.476113	InChI=1S/C7H6O/c8-6-7-4-2-1-3-5-7/h1-6H
106	C2H2O5	unknown	NMOC_g				0.000727173	0.0005697	0.000138158			0.00067443				0.000211644		0	0	0	1	1	1	0	0	1	0	0	0	1	0															105.99016_C2H2O5
107	C7H9N	Dimethyl pyridine + ethylpyridine + heptylnitriles	NMOC_g		0.0018		0.010846	0.0242692	0.00168297			0.0594341				0.00518528		0	1	0	1	1	1	0	0	1	0	0	0	1	0															107.07316_C7H9N
107	C2H5NO2S	unknown	NMOC_g				0.000327361	0.00022788	0.000445371			0.000421518				0.000317466		0	0	0	1	1	1	0	0	1	0	0	0	1	0															107.00316_C2H6NO2S
107	C2H5NO4	Ethene hydroxynitrate	NMOC_g	0.002			0.00456175									0.001		1	0	0	3	0	0	0	0	0	0	0	0	3	0				0.00198545									0		InChI=1S/C2H5NO4/c1-2(3)7-5-4-6/h2,6H,1H2,(H,4,5)
107	C3H9NO3	unknown	NMOC_g				0.0055706	0.00729216	0.000927467			0.0150904				0.00444453		0	0	0	1	1	1	0	0	1	0	0	0	1	0															107.05816_C3H9NO3
107	C6H5NO	Pyridine aldehyde + methylfuronitrile + nitrosobenzene	NMOC_g				0.00859155	0.0145843	0.00158736			0.0183782				0.00666679		0	0	0	1	1	1	0	0	1	0	0	0	1	0															107.03616_C6H5NO
107	C6H5NO	Pyridine aldehyde	NMOC_g		0.0015													0	1	0	0	0	0	0	0	0	0	0	0	0	0															InChI=1S/C6H5NO/c8-5-6-3-1-2-4-7-6/h1-5H
108	C8H12	unknown	NMOC_g						0.0312444	0.0123279	0.00813288	0.128732				0.0245282	0.0896885	0	0	0	0	0	2	1	2	1	0	0	0	2	1						0.0250187		0.000897724					0.0139498		108.09316_C8H12
108	C8H12	Cyclooctadiene	NMOC_g		0.0496812													0	1	0	0	0	0	0	0	0	0	0	0	0	0															InChI=1S/C8H12/c1-2-4-6-8-7-5-3-1/h1-4H,5-8H2/b3-1-,4-2-
108	C8H12	C8H12 isomers	NMOC_g		0.126672		0.0721643	0.285406										0	1	0	1	1	0	0	0	0	0	0	0	0	0															874.726_1.276
108	C2H2Cl2	1,2-Dichloroethene	NMOC_g								0.0001	0.00167298				0.0001	0.0496	0	0	0	0	0	0	0	1	3	0	0	0	1	1									0.000908497						InChI=1S/C2H2Cl2/c3-1-2-4/h1-2H
108	C6H4O2	unknown	NMOC_g	0.0023														1	0	0	0	0	0	0	0	0	0	0	0	0	0															108.020606_C6H4O2
108	C6H4O2	Quinone (=p-benzoquinone)	NMOC_g		0.025		0.116674	0.0558306	0.356398			0.0601928				0.0621555		0	1	0	2	1	1	0	0	1	0	0	0	1	0				0.0266273											InChI=1S/C6H4O2/c7-5-1-2-6(8)4-3-5/h1-4H
108	C7H8O	2-Methylphenol (=o-cresol) + anisol	NMOC_g							0.0755657	0.011223	0.941841					0.0124799	0	0	0	0	0	0	1	2	1	0	0	0	0	1								0.0114069							108.05716_C7H8O
108	C7H8O	Furan, 2-(2-propenyl)-	NMOC_g				0.00208093									0.00091823		0	0	0	1	0	0	0	0	0	0	0	0	1	0															InChI=1S/C7H8O/c1-2-4-7-5-3-6-8-7/h2-3,5-6H,1,4H2
108	C7H8O	Furan, 2-(1-propenyl)-	NMOC_g													0.000612153		0	0	0	0	0	0	0	0	0	0	0	0	1	0															InChI=1S/C7H8O/c1-2-4-7-5-3-6-8-7/h2-6H,1H3
108	C7H8O	Cyclopentanone, 3,4-bis(methylene)-	NMOC_g													0.00091823		0	0	0	0	0	0	0	0	0	0	0	0	1	0															InChI=1S/C7H8O/c1-5-3-7(8)4-6(5)2/h1-4H2
108	C7H8O	Phenol, 2-methyl	NMOC_g	0.22	0.077634		0.151993	0.321249	0.105564							0.155534		1	1	0	4	1	1	0	0	0	0	0	0	5	0				0.0517126									0.0422787		InChI=1S/C7H8O/c1-6-4-2-3-5-7(6)8/h2-5,8H,1H3
108	C7H8O	Anisole	NMOC_g		0.0156761		0.0170232									0.00513064		0	1	0	1	0	0	0	0	0	0	0	0	1	0															InChI=1S/C7H8O/c1-8-7-5-3-2-4-6-7/h2-6H,1H3
108	C7H8O	Phenol, 3+4-methyl	NMOC_g		0.0253599		0.0312718									0.0276489		0	1	0	1	0	0	0	0	0	0	0	0	1	0															1579.5_0.959
108	C6H8N2	2-Ethylpyrazine	NMOC_g				0.0116333		0.0041									0	0	0	3	0	1	0	0	0	0	0	0	0	0				0.00828633											InChI=1S/C6H8N2/c1-2-6-5-7-3-4-8-6/h3-5H,2H2,1H3
109	C6H5O2	unknown	NMOC_g		0.003		0.0252413	0.0126473	0.00402613			0.0126456				0.0186247		0	1	0	1	1	1	0	0	1	0	0	0	1	0															109.02816_C6H5O2
109	C7H11N	C7 acrylonitrile	NMOC_g				0.00757132	0.0124195	0.000859845			0.038021				0.00507946		0	0	0	1	1	1	0	0	1	0	0	0	1	0															109.08816_C7H11N
109	C6H7NO	unknown	NMOC_g				0.0139749	0.0223322	0.00255009			0.11263				0.0140743		0	0	0	1	1	1	0	0	1	0	0	0	1	0															109.05216_C6H7NO
110	C6H6O2	5-Methyl furfural +benzene diols (=catechol, resorcinol)	NMOC_g	0.9072						0.114604	0.100866	1.05717					0.125131	2	0	0	0	0	0	1	2	1	0	0	0	0	1	0.626214							0.0564197							110.03616_C6H6O2
110	C6H6O2	Furan, 2-acetyl-	NMOC_g		0.00904731		0.0136995									0.0179565		0	1	0	1	0	0	0	0	0	0	0	0	1	0															InChI=1S/C6H6O2/c1-5(7)6-3-2-4-8-6/h2-4H,1H3
110	C6H6O2	5-Methyl furfural	NMOC_g		0.122988		0.0170069	0.466133								0.528336		0	1	0	1	1	0	0	0	0	0	0	0	1	0															InChI=1S/C6H6O2/c1-5-2-3-6(4-7)8-5/h2-4H,1H3
110	C6H6O2	Resorcinol	NMOC_g				1.49451		0.345388									0	0	0	3	0	1	0	0	0	0	0	0	0	0				0.832907											InChI=1S/C6H6O2/c7-5-2-1-3-6(8)4-5/h1-4,7-8H
110	C6H6O2	Catechol	NMOC_g				0.281237											0	0	0	1	0	0	0	0	0	0	0	0	0	0															InChI=1S/C6H6O2/c7-5-3-1-2-4-6(5)8/h1-4,7-8H
110	C7H10O	C3 furan + various hco	NMOC_g	0.106					0.0210719	0.0251125	0.0502205	0.257716					0.0374396	1	0	0	0	0	2	1	2	1	0	0	0	0	1						0.00160563		0.0498148							110.07216_C7H10O
110	C7H10O	Furan, 2-propyl-	NMOC_g		0.00453962		0.00862625									0.00176126		0	1	0	1	0	0	0	0	0	0	0	0	1	0															InChI=1S/C7H10O/c1-2-4-7-5-3-6-8-7/h3,5-6H,2,4H2,1H3
110	C7H10O	Furan, 2-ethyl-5-methyl-	NMOC_g		0.0245139		0.0224282	0.0613009								0.0264188		0	1	0	1	1	0	0	0	0	0	0	0	1	0															InChI=1S/C7H10O/c1-3-7-5-4-6(2)8-7/h4-5H,3H2,1-2H3
110	C7H10O	2-Cyclopenten-1-one, 2,3-dimethyl-	NMOC_g													0.0145304		0	0	0	0	0	0	0	0	0	0	0	0	1	0															InChI=1S/C7H10O/c1-5-3-4-7(8)6(5)2/h3-4H2,1-2H3
110	C7H10O	2-Cyclopenten-1-one, 3,4-dimethyl-	NMOC_g				0.0176838									0.0198141		0	0	0	1	0	0	0	0	0	0	0	0	1	0															InChI=1S/C7H10O/c1-5-3-7(8)4-6(5)2/h3,6H,4H2,1-2H3
110	C7H10O	Furan, 2,3,5-trimethyl-	NMOC_g		0.0136189		0.00754797	0.0315019								0.00572408		0	1	0	1	1	0	0	0	0	0	0	0	1	0															InChI=1S/C7H10O/c1-5-4-6(2)8-7(5)3/h4H,1-3H3
110	C7H10O	3-Methyl-3-cyclohexen-1-one	NMOC_g													0.00792565		0	0	0	0	0	0	0	0	0	0	0	0	1	0															InChI=1S/C7H10O/c1-6-3-2-4-7(8)5-6/h3H,2,4-5H2,1H3
110	C7H10O	C7H10O isomers	NMOC_g													0.00704502		0	0	0	0	0	0	0	0	0	0	0	0	1	0															1514.52_2.917
110	C8H14	unknown	NMOC_g	0.0191						0.0045659		0.110016						1	0	0	0	0	0	1	0	1	0	0	0	0	0															110.109027_C8H14
110	C8H14	Cyclooctene	NMOC_g		0.00728442													0	1	0	0	0	0	0	0	0	0	0	0	0	0															InChI=1S/C8H14/c1-2-4-6-8-7-5-3-1/h1-2H,3-8H2/b2-1-
110	C8H14	Cyclopentene, 3-propyl-	NMOC_g		0.00260985		0.00133651	0.0135836										0	1	0	1	1	0	0	0	0	0	0	0	0	0															InChI=1S/C8H14/c1-2-5-8-6-3-4-7-8/h3,6,8H,2,4-5,7H2,1H3
110	C8H14	Cyclohexane, ethylidene-	NMOC_g				0.00212269	0.0122899										0	0	0	1	1	0	0	0	0	0	0	0	0	0															InChI=1S/C8H14/c1-2-8-6-4-3-5-7-8/h2H,3-7H2,1H3
110	C8H14	Octadiene	NMOC_g				0.0306608		0.015624									0	0	0	3	0	1	0	0	0	0	0	0	0	0				0.0120112											InChI=1S/C8H14/c1-3-5-7-8-6-4-2/h3,5,7H,1,4,6,8H2,2H3/b7-5+
110	C8H14	1,7-Octadiene	NMOC_g		0.00714872		0.00911972	0.0153624								0.00324089		0	1	0	1	1	0	0	0	0	0	0	0	1	0															InChI=1S/C8H14/c1-3-5-7-8-6-4-2/h3-4H,1-2,5-8H2
110	C8H14	1-Ethyl-5-methylcyclopentene	NMOC_g		0.00147513		0.00180822	0.00937913								0.00121533		0	1	0	1	1	0	0	0	0	0	0	0	1	0															InChI=1S/C8H14/c1-3-8-6-4-5-7(8)2/h6-7H,3-5H2,1-2H3
110	C8H14	C8H14 isomers	NMOC_g		0.0229213		0.0441049	0.126133								0.0153942		0	1	0	1	1	0	0	0	0	0	0	0	1	0															689.786_1.082
110	C2H4Cl2	1,2-Dichloroethane	NMOC_g		0.0006		0.0008				0.00075	0.0012						0	1	0	2	0	0	0	2	2	0	0	0	0	0				0				0.000636396	0.000424264						InChI=1S/C2H4Cl2/c3-1-2-4/h1-2H2
111	C6H9NO	unknown	NMOC_g				0.00582451	0.00592488	0.000385032			0.0609516				0.00645515		0	0	0	1	1	1	0	0	1	0	0	0	1	0															111.06815999999999_C6H9NO
111	C7H11O	unknown	NMOC_g				0.00188508	0.00387396	0.000377749			0.000843037				0.000634932		0	0	0	1	1	1	0	0	1	0	0	0	1	0															111.08015999999999_C7H12O
111	C5H5NO2	Dihydroxy pyridine + methyl maleimide	NMOC_g		0.0026		0.016902	0.0239274	0.00131833			0.0331314				0.00994727		0	1	0	2	1	1	0	0	1	0	0	0	1	0				0.010038											111.03116_C5H5NO2
112	C5H4O3	5-Hydroxy 2-furfural/2-furoic acid	NMOC_g	0.2088	0.0988737		0.136077	0.181105	0.0356246	0.02009	0.0226763	0.193899				0.136464	0.0705528	1	2	0	3	2	2	1	2	1	0	0	0	2	1		0.0818457		0.0201825	0.0302096	0.017193		0.00918696					0.0460104		112.01516_C5H4O3
112	C6H8O2	2-Hydroxy-3-methyl-2-cyclopenten-1-one	NMOC_g	0.3046	0.210508		0.246027	0.162541	0.0683581	0.0908615	0.090847	0.463502				0.373614	0.0921845	1	1	0	3	2	2	1	2	1	0	0	0	2	1				0.109744	0.0416614	0.0077752		0.0548079					0.166479		InChI=1S/C6H8O2/c1-4-2-3-5(7)6(4)8/h8H,2-3H2,1H3
112	C6H8O2	Cyclohexanedione	NMOC_g		0.014													0	1	0	0	0	0	0	0	0	0	0	0	0	0															InChI=1S/C6H8O2/c7-5-3-1-2-4-6(5)8/h1-4H2
112	C7H12O	Ethylcyclopentanone	NMOC_g		0.007		0.0161446	0.0376002	0.00192838			0.0289162				0.010618		0	1	0	2	1	1	0	0	1	0	0	0	2	0				0.00331572									0.0137176		InChI=1S/C7H12O/c1-2-6-4-3-5-7(6)8/h6H,2-5H2,1H3
112	C8H16	unknown	NMOC_g					0.0270038	0.00237812			0.0417303						0	0	0	0	1	1	0	0	1	0	0	0	0	0															112.12416_C8H16
112	C8H16	Cyclopentane, propyl-	NMOC_g		0.000959563		0.00165471	0.009										0	1	0	1	1	0	0	0	0	0	0	0	0	0															InChI=1S/C8H16/c1-2-5-8-6-3-4-7-8/h8H,2-7H2,1H3
112	C8H16	Cyclohexane, ethyl-	NMOC_g		0.000822483		0.001053	0.0101										0	1	0	1	1	0	0	0	0	0	0	0	0	0															InChI=1S/C8H16/c1-2-8-6-4-3-5-7-8/h8H,2-7H2,1H3
112	C8H16	2-Octene, (e)-	NMOC_g		0.00466074		0.00488892	0.0249								0.000755275		0	1	0	1	1	0	0	0	0	0	0	0	1	0															InChI=1S/C8H16/c1-3-5-7-8-6-4-2/h3,5H,4,6-8H2,1-2H3/b5-3+
112	C8H16	2-Octene, (z)-	NMOC_g		0.00260453		0.00240685	0.0159								0.00030211		0	1	0	1	1	0	0	0	0	0	0	0	1	0															InChI=1S/C8H16/c1-3-5-7-8-6-4-2/h3,5H,4,6-8H2,1-2H3/b5-3-
112	C8H16	1-Octene	NMOC_g	0.023	0.0457849		0.0286253	0.1264	0.0286							0.0182601		1	1	0	9	2	2	0	0	0	0	0	0	4	0				0.0249277	0.0865499	0.0333754							0.00670754		InChI=1S/C8H16/c1-3-5-7-8-6-4-2/h3H,1,4-8H2,2H3
112	C8H16	3-Octene, (e)-	NMOC_g		0.00233037		0.00150428	0.0102										0	1	0	1	1	0	0	0	0	0	0	0	0	0															InChI=1S/C8H16/c1-3-5-7-8-6-4-2/h5,7H,3-4,6,8H2,1-2H3/b7-5+
112	C8H16	Cyclopentane, 1-ethyl-2-methyl-, cis-	NMOC_g					0.0025										0	0	0	0	1	0	0	0	0	0	0	0	0	0															InChI=1S/C8H16/c1-3-8-6-4-5-7(8)2/h7-8H,3-6H2,1-2H3/t7-,8+/m1/s1
112	C8H16	1-Heptene, 2-methyl-	NMOC_g				0.00135386	0.0079								0.00030211		0	0	0	1	1	0	0	0	0	0	0	0	1	0															InChI=1S/C8H16/c1-4-5-6-7-8(2)3/h2,4-7H2,1,3H3
112	C8H16	2-Heptene, 6-methyl- (e)	NMOC_g					0.0081								0.000755275		0	0	0	0	1	0	0	0	0	0	0	0	1	0															InChI=1S/C8H16/c1-4-5-6-7-8(2)3/h4-5,8H,6-7H2,1-3H3/b5-4+
112	C8H16	3-Heptene, 2-methyl-, (e)-	NMOC_g		0.00191913			0.0039										0	1	0	0	1	0	0	0	0	0	0	0	0	0															InChI=1S/C8H16/c1-4-5-6-7-8(2)3/h6-8H,4-5H2,1-3H3/b7-6+
112	C8H16	2-Methyl-2-heptene	NMOC_g		0.00219329		0.00135386	0.0122								0.00060422		0	1	0	1	1	0	0	0	0	0	0	0	1	0															InChI=1S/C8H16/c1-4-5-6-7-8(2)3/h7H,4-6H2,1-3H3
112	C8H16	3-Heptene, 2-methyl-(z)	NMOC_g					0.0051										0	0	0	0	1	0	0	0	0	0	0	0	0	0															InChI=1S/C8H16/c1-4-6-7-8(3)5-2/h5H,4,6-7H2,1-3H3/b8-5-
112	C8H16	1-Pentene, 3-ethyl-3-methyl-	NMOC_g					0.0036										0	0	0	0	1	0	0	0	0	0	0	0	0	0															InChI=1S/C8H16/c1-5-8(4,6-2)7-3/h5H,1,6-7H2,2-4H3
112	C8H16	1-Hexene, 2,5-dimethyl-	NMOC_g		0.00164497		0.00120343	0.0138								0.000453165		0	1	0	1	1	0	0	0	0	0	0	0	1	0															InChI=1S/C8H16/c1-7(2)5-6-8(3)4/h8H,1,5-6H2,2-4H3
112	C8H16	Cyclohexane, 1,4-dimethyl-	NMOC_g		0.00164497		0.00188035	0.0098								0.000755275		0	1	0	1	1	0	0	0	0	0	0	0	1	0															InChI=1S/C8H16/c1-7-3-5-8(2)6-4-7/h7-8H,3-6H2,1-2H3
112	C8H16	Cyclohexane, 1,3-dimethyl-, trans-	NMOC_g					0.003										0	0	0	0	1	0	0	0	0	0	0	0	0	0															InChI=1S/C8H16/c1-7-4-3-5-8(2)6-7/h7-8H,3-6H2,1-2H3/t7-,8-/m1/s1
112	C8H16	C8H16 isomers	NMOC_g					0.0101										0	0	0	0	1	0	0	0	0	0	0	0	0	0															634.803_1.034
113	C7H15N	unknown	NMOC_g				0.000739776	0.00205092	0.000137187			0.00758733				0.000634932		0	0	0	1	1	1	0	0	1	0	0	0	1	0															113.12016_C7H15N
113	C6H11NO	unknown	NMOC_g				0.00207238	0.00364608	0.000241048			0.0196428				0.00126986		0	0	0	1	1	1	0	0	1	0	0	0	1	0															113.08315999999999_C6H11NO
113	C5H7NS	unknown	NMOC_g				0.0040479	0.00364608	0.000515907			0.0144159				0.00666679		0	0	0	1	1	1	0	0	1	0	0	0	1	0															113.02916_C5H8NS
113	C5H7NO2	unknown	NMOC_g				0.0116521	0.032245	0.00137575			0.0716581				0.00709008		0	0	0	1	1	1	0	0	1	0	0	0	1	0															113.04716_C5H7NO2
113	C4H3NO3	Nitrofuran	NMOC_g				0.00355769	0.0011394	0.000413017			0.00143316				0.00211644		0	0	0	2	1	1	0	0	1	0	0	0	1	0				0.00218115											InChI=1S/C4H3NO3/c6-5(7)4-2-1-3-8-4/h1-3H
114	C8H18	N-octane	NMOC_g	0.013	0.0126799		0.018929	0.14075	0.012		0.00765116	0.021644				0.0149413	0.147	1	2	0	9	2	2	0	2	4	0	0	0	8	1		0.000484653		0.0115015	0.0604576	0.00989949		0.00389073	0.0237159				0.0274982		InChI=1S/C8H18/c1-3-5-7-8-6-4-2/h3-8H2,1-2H3
114	C8H18	Heptane, 2-methyl-	NMOC_g				0.0147	0.0342										0	0	0	1	1	0	0	0	0	0	0	0	0	0															InChI=1S/C8H18/c1-4-5-6-7-8(2)3/h8H,4-7H2,1-3H3
114	C8H18	Heptane, 3-methyl-	NMOC_g				0.0074	0.0017										0	0	0	1	1	0	0	0	0	0	0	0	0	0															InChI=1S/C8H18/c1-4-6-7-8(3)5-2/h8H,4-7H2,1-3H3
114	C8H18	Hexane, 2,3-dimethyl-	NMOC_g													0.000102026		0	0	0	0	0	0	0	0	0	0	0	0	1	0															InChI=1S/C8H18/c1-5-6-8(4)7(2)3/h7-8H,5-6H2,1-4H3
114	C8H18	2,3,4-Trimethylpentane	NMOC_g				0.0067											0	0	0	1	0	0	0	0	0	0	0	0	0	0															InChI=1S/C8H18/c1-6(2)8(5)7(3)4/h6-8H,1-5H3
114	C8H18	Pentane,2,3,3-trimethyl	NMOC_g		0.000274161			0.0052										0	1	0	0	1	0	0	0	0	0	0	0	0	0															InChI=1S/C8H18/c1-6-8(4,5)7(2)3/h7H,6H2,1-5H3
114	C8H18	Hexane, 2,5-dimethyl-	NMOC_g				0.000346822											0	0	0	1	0	0	0	0	0	0	0	0	0	0															InChI=1S/C8H18/c1-7(2)5-6-8(3)4/h7-8H,5-6H2,1-4H3
114	C8H18	Pentane, 2,2,4-trimethyl-	NMOC_g	0.004	0.00644278		0.0086659		0.003			0.0639417				0.0773		1	1	0	5	0	1	0	0	3	0	0	0	4	0				0.0109997					0.0807134				0.147272		InChI=1S/C8H18/c1-7(2)6-8(3,4)5/h7H,6H2,1-5H3
114	C6H10O2	C6 diones + c6 1-dbe esters	NMOC_g						0.00830576			0.0606144						0	0	0	0	0	2	0	0	1	0	0	0	0	0						0.000561488									114.06716_C6H10O2
114	C6H10O2	2-Vinylethyl acetate	NMOC_g		0.0109808													0	1	0	0	0	0	0	0	0	0	0	0	0	0															InChI=1S/C6H10O2/c1-3-4-5-8-6(2)7/h3H,1,4-5H2,2H3
114	C6H10O2	caprolactone/C6 esters/ C6 diketone isomers	NMOC_g		0.041983		0.0168353	0.0351477								0.0261507		0	2	0	1	1	0	0	0	0	0	0	0	1	0		0.00837423													664.794_1.738
114	C7H14O	Heptanal + 2,4-dimethyl-3-pentanone + heptanone	NMOC_g		0.0039				0.00175933			0.0306865						0	1	0	0	0	1	0	0	1	0	0	0	0	0															114.10416_C7H14O
114	C7H14O	Heptanal	NMOC_g		0.00959563		0.00970465	0.0131316										0	1	0	1	1	0	0	0	0	0	0	0	0	0															InChI=1S/C7H14O/c1-2-3-4-5-6-7-8/h7H,2-6H2,1H3
114	C7H14O	2-Heptanone	NMOC_g				0.00267714	0.00649033								0.0054626		0	0	0	1	1	0	0	0	0	0	0	0	1	0															InChI=1S/C7H14O/c1-3-4-5-6-7(2)8/h3-6H2,1-2H3
114	C7H14O	3-Pentanone, 2,4-dimethyl	NMOC_g		0.00726527			0.00603752								0.0081939		0	1	0	0	1	0	0	0	0	0	0	0	1	0															InChI=1S/C7H14O/c1-5(2)7(8)6(3)4/h5-6H,1-4H3
114	C5H6O3	unknown	NMOC_g	0.7687	0.229076					0.0737394	0.0615814						0.115979	1	1	0	0	0	0	1	2	0	0	0	0	0	1								0.0323954							114.031171_C5H6O3
114	C5H6O3	5-Hydroxymethyl-2[3h]-furanone	NMOC_g				0.209711	0.171227	0.0728301			0.582033				0.368204		0	0	0	2	1	1	0	0	1	0	0	0	1	0				0.204374											InChI=1S/C5H6O3/c6-3-4-1-2-5(7)8-4/h1,6H,2-3H2
115	C4H5NO3	unknown	NMOC_g				0.0022935	0.0028485	0.000620254			0.00345645				0.00158733		0	0	0	1	1	1	0	0	1	0	0	0	1	0															115.02616_C4H5NO3
115	C5H9NO2	unknown	NMOC_g				0.00182949	0.00239274	0.000413017			0.0114653				0.00179898		0	0	0	1	1	1	0	0	1	0	0	0	1	0															115.06316_C5H9NO2
115	C6H13NO	unknown	NMOC_g				0.00419816	0.00581094	0.000446828			0.0240266				0.00317466		0	0	0	1	1	1	0	0	1	0	0	0	1	0															115.09916_C6H13NO
116	C4H4O4	unknown	NMOC_g				0.00800088	0.0117358	0.00316161			0.00708151				0.00793665		0	0	0	1	1	1	0	0	1	0	0	0	1	0															116.01016_C4H4O4
116	C5H8O3	5-Hydroxymethyl tetrahydro 2-furanone + 5-hydroxy tetrahydro 2-furfural	NMOC_g	0.1906	0.0893396		0.138826	0.0279185	0.0494954	0.182408	0.0492942	0.243891				0.419044	0.0161406	1	2	0	4	2	2	1	2	1	0	0	0	3	1		0.0825047		0.0699554	0.0190185	0.00382135		0.0457142					0.196675		116.04716_C5H8O3
116	C6H12O2	C6 esters	NMOC_g		0.0205986			0.0563247	0.011654	0.0159807	0.00621707	0.0423205					0.0425979	0	2	0	0	2	2	1	1	1	0	0	0	0	1		0.018807			0.0205184	0.0157912									116.08315999999999_C6H12O2
116	C6H12O2	N-butyl acetate	NMOC_g				0.00999834									0.00242564		0	0	0	1	0	0	0	0	0	0	0	0	2	0													0.000141421		InChI=1S/C6H12O2/c1-3-4-5-8-6(2)7/h3-5H2,1-2H3
116	C9H8	Indene + propynyl benzene isomer	NMOC_g	0.0244						0.236514	0.039069	0.024701					0.160907	1	0	0	0	0	0	1	1	1	0	0	0	0	1															116.06215999999999_C9H8
116	C9H8	Indene	NMOC_g		0.0719673		0.0701125	0.0347222	0.0220473							0.0169917		0	1	0	4	1	1	0	0	0	0	0	0	1	0				0.0127362											InChI=1S/C9H8/c1-2-5-9-7-3-6-8(9)4-1/h1-6H,7H2
116	C9H8	Benzene,1-ethynyl-2-methyl-	NMOC_g		0.0056203		0.0192585									0.000471993		0	1	0	1	0	0	0	0	0	0	0	0	1	0															InChI=1S/C9H8/c1-3-9-7-5-4-6-8(9)2/h1,4-7H,2H3
116	C6H12S	Cyclohexanethiol	NMOC_g		0.0032													0	1	0	0	0	0	0	0	0	0	0	0	0	0															InChI=1S/C6H12S/c7-6-4-2-1-3-5-6/h6-7H,1-5H2
116	C7H16O	unknown	NMOC_g				0.0102998	0.00250668	0.00176224			0.0202329				0.0476199		0	0	0	1	1	1	0	0	1	0	0	0	1	0															116.11916_C7H16O
117	C3H3NO4	unknown	NMOC_g				0.000555263	0.0005697	0.000138158			0.00067443				0.000423288		0	0	0	1	1	1	0	0	1	0	0	0	1	0															117.00516_C3H3NO4
117	C8H7N	Benzeneacetonitrile	NMOC_g				0.0120161	0.0211928	0.00306163			0.0520997				0.00412706		0	0	0	2	1	1	0	0	1	0	0	0	1	0				0.00341686											InChI=1S/C8H7N/c9-7-6-8-4-2-1-3-5-8/h1-5H,6H2
117	C4H7NO3	Butene nitrates	NMOC_g				0.0038718	0.00649458	0.000999459			0.00817746				0.00444453		0	0	0	1	1	1	0	0	1	0	0	0	1	0															117.04216_C4H7NO3
118	C9H10	Indane + methyl styrenes + propenyl benzenes	NMOC_g	0.0147						0.0602699	0.00864564	0.063565					0.0357756	1	0	0	0	0	0	1	2	1	0	0	0	0	1								0.00580863							118.07816_C9H10
118	C9H10	Indane	NMOC_g		0.00615272		0.00844632	0.0229918	0.00596669							0.00209137		0	1	0	4	1	1	0	0	0	0	0	0	1	0				0.00292012											InChI=1S/C9H10/c1-2-5-9-7-3-6-8(9)4-1/h1-2,4-5H,3,6-7H2
118	C9H10	2-Propenylbenzene	NMOC_g		0.00522981		0.00651711	0.0103776	0.00411496							0.00118208		0	1	0	4	1	1	0	0	0	0	0	0	1	0				0.001297											InChI=1S/C9H10/c1-2-6-9-7-4-3-5-8-9/h2-5,7-8H,1,6H2
118	C9H10	Benzene, 1-propenyl, trans	NMOC_g		0.0076909		0.0101353	0.0177135								0.0021823		0	1	0	1	1	0	0	0	0	0	0	0	1	0															InChI=1S/C9H10/c1-2-6-9-7-4-3-5-8-9/h2-8H,1H3
118	C9H10	1-Propenylbenzene	NMOC_g				0.00224386		0.0031548									0	0	0	3	0	1	0	0	0	0	0	0	0	0				0.00130128											InChI=1S/C9H10/c1-2-6-9-7-4-3-5-8-9/h2-8H,1H3/b6-2+
118	C9H10	Cis-1-propenylbenzene	NMOC_g		0.00379418		0.00473613	0.00733591								0.00109115		0	1	0	1	1	0	0	0	0	0	0	0	1	0															InChI=1S/C9H10/c1-2-6-9-7-4-3-5-8-9/h2-8H,1H3/b6-2-
118	C9H10	3-Methylstyrene	NMOC_g		0.0456327		0.0256286	0.039095	0.0137165							0.00900198		0	1	0	4	1	1	0	0	0	0	0	0	1	0				0.00975411											InChI=1S/C9H10/c1-3-9-6-4-5-8(2)7-9/h3-7H,1H2,2H3
118	C9H10	4-Methylstyrene	NMOC_g		0.0108698		0.00984155		0.00425212							0.0021823		0	1	0	4	0	1	0	0	0	0	0	0	1	0				0.00292366											InChI=1S/C9H10/c1-3-9-6-4-8(2)5-7-9/h3-7H,1H2,2H3
118	C9H10	2-Methylstyrene	NMOC_g				0.0122503		0.00925865									0	0	0	3	0	1	0	0	0	0	0	0	0	0				0.00516269											InChI=1S/C9H10/c1-3-9-7-5-4-6-8(9)2/h3-7H,1H2,2H3
118	C9H10	Alpha-methylstyrene	NMOC_g		0.0128182		0.00747489	0.00581505	0.00322338							0.00209137		0	1	0	4	1	1	0	0	0	0	0	0	1	0				0.00721793											InChI=1S/C9H10/c1-8(2)9-6-4-3-5-7-9/h3-7H,1H2,2H3
118	C8H6O	Benzofuran	NMOC_g	0.07445	0.0399908		0.146846	0.0484524	0.047517	0.0280803	0.00938585	0.0605301				0.0504788	0.236025	2	3	0	11	3	3	1	2	1	0	0	0	7	2	0.0630032	0.0200401		0.255329	0.0169947	0.0483288		0.00769259					0.0381945	0.307904	InChI=1S/C8H6O/c1-2-4-8-7(3-1)5-6-9-8/h1-6H
118	C4H6O4	unknown	NMOC_g				0.0117593	0.0142425	0.00247664			0.00733442				0.00772501		0	0	0	1	1	1	0	0	1	0	0	0	1	0															118.02616_C4H6O4
118	C4H6O4	Succinic acid	NMOC_g		0.0017													0	1	0	0	0	0	0	0	0	0	0	0	0	0															InChI=1S/C4H6O4/c5-3(6)1-2-4(7)8/h1-2H2,(H,5,6)(H,7,8)
118	C5H10O3	Isoprene hydroxy hydroperoxides/isoprene epoxydiols	NMOC_g				0.0408167	0.0101407	0.00120233			0.0175352				0.00444453		0	0	0	2	1	1	0	0	1	0	0	0	1	0				0.0497567											118.11799999999998_C5H10O3
119	C7H5NO	unknown	NMOC_g				0.00553392	0.0124195	0.00117143			0.0212445				0.0062435		0	0	0	1	1	1	0	0	1	0	0	0	1	0															119.03616_C7H5NO
119	C8H9N	Dihydro pyridine	NMOC_g		0.0016		0.00209735	0.0034182	0.000377749			0.0114653				0.000423288		0	1	0	1	1	1	0	0	1	0	0	0	1	0															119.07316_C8H9N
119	C4H9NO3	Isobutyl nitrate + 2-butyl nitrate	NMOC_g					0.0017091	0.000480639							0.00645515		0	0	0	0	1	1	0	0	0	0	0	0	1	0															119.058244_C4H9NO3
119	C4H9NO3	2-Butyl nitrate	NMOC_g		0.00184102	0.0006	0.00107518	0.012			0.0004	0.00382253						0	2	1	3	1	0	0	2	2	0	0	0	0	0		8.34058e-05		0.00038175				0.000424264	0.00148492						InChI=1S/C4H9NO3/c1-3-4(2)8-5(6)7/h4H,3H2,1-2H3
119	C6H17NO	unknown	NMOC_g				0.000306238	0.0005697				0.00134886				0.00052911		0	0	0	1	1	0	0	0	1	0	0	0	1	0															119.13016_C6H17NO
119	C9H11	unknown	NMOC_g				0.000871426	0.00193698	0.000138158			0.00185468				0.00052911		0	0	0	1	1	1	0	0	1	0	0	0	1	0															119.08516_C9H12
120	C3H4O5	unknown	NMOC_g				0.00192186	0.00182304	0.000377749			0.00109595				0.000317466		0	0	0	1	1	1	0	0	1	0	0	0	1	0															120.00516_C3H4O5
120	C4H8O4	unknown	NMOC_g				0.0122181	0.0102546	0.00240611			0.028326				0.0242333		0	0	0	1	1	1	0	0	1	0	0	0	1	0															120.04216_C4H8O4
120	C6H16O2	unknown	NMOC_g				0.00649163	0.0017091	0.000792222			0.0247853				0.0209528		0	0	0	1	1	1	0	0	1	0	0	0	1	0															120.11416_C6H16O2
120	C8H8O	Tolualdehydes	NMOC_g		0.025							0.34691						0	1	0	0	0	0	0	0	1	0	0	0	0	0															120.05716_C8H8O
120	C8H8O	Benzofuran, 2,3-dihydro-	NMOC_g													0.00108145		0	0	0	0	0	0	0	0	0	0	0	0	1	0															InChI=1S/C8H8O/c1-2-4-8-7(3-1)5-6-9-8/h1-4H,5-6H2
120	C8H8O	Vinylphenol	NMOC_g	0.2538	0.235769		0.161141	0.108102	0.0644086	0.0406365	0.0768244					0.266561	0.0420987	1	1	0	1	1	1	1	2	0	0	0	0	1	1								0.0994375							InChI=1S/C8H8O/c1-2-7-5-3-4-6-8(7)9/h2-6,9H,1H2
120	C8H8O	Acetophenone	NMOC_g		0.00548322		0.0031185	0.0112545								0.00471904		0	1	0	1	1	0	0	0	0	0	0	0	1	0															InChI=1S/C8H8O/c1-7(9)8-5-3-2-4-6-8/h2-6H,1H3
120	C8H8O	Benzeneacetaldehyde	NMOC_g		0.00178205		0.00273403									0.000786507		0	1	0	1	0	0	0	0	0	0	0	0	1	0															InChI=1S/C8H8O/c9-7-6-8-4-2-1-3-5-8/h1-5,7H,6H2
120	C8H8O	Benzaldehyde, 2+3-methyl-	NMOC_g		0.0278273		0.0216159									0.00717688		0	1	0	1	0	0	0	0	0	0	0	0	1	0															1604.49_3.247
120	C9H12	Trimethylbenzene;assorted hcs	NMOC_g							0.0429195						0.0440964		0	0	0	0	0	0	1	0	0	0	0	0	6	0													0.0398327		120.093377_C9H12
120	C9H12	N-propylbenzene	NMOC_g	0.00674643	0.0112651		0.00670592	0.0243532	0.00614279		0.00750522	0.0171052				0.00290532	0.0201162	1	2	0	10	2	2	0	5	6	0	0	0	8	1		0.00272129		0.00415365	0.0229103	0.00254558		0.0114953	0.0172857				0.00190164		InChI=1S/C9H12/c1-2-6-9-7-4-3-5-8-9/h3-5,7-8H,2,6H2,1H3
120	C9H12	3-Ethyltoluene	NMOC_g	0.011244	0.0127332		0.0176273	0.0217252	0.00613176		0.0147105	0.0324985				0.0275333	0.0231109	1	1	0	6	1	1	0	5	6	0	0	0	3	1				0.0120191				0.0107992	0.0292526				0.0322406		InChI=1S/C9H12/c1-3-9-6-4-5-8(2)7-9/h4-7H,3H2,1-2H3
120	C9H12	4-Ethyltoluene	NMOC_g	0.00674643	0.00785213		0.0124648	0.018909	0.00545045		0.00889448	0.0191272				0.00872857	0.0115229	1	1	0	6	1	1	0	5	6	0	0	0	7	1				0.0158935				0.0108827	0.0176969				0.0128466		InChI=1S/C9H12/c1-3-9-6-4-8(2)5-7-9/h4-7H,3H2,1-2H3
120	C9H12	2-Ethyltoluene	NMOC_g	0.00674643	0.0109804		0.00978549	0.0390521	0.00712722		0.00822313	0.0182583				0.0133897	0.0149732	1	2	0	10	2	2	0	5	6	0	0	0	4	1		0.00756699		0.00690549	0.0046669	0.00289914		0.0113011	0.0165426				0.0175573		InChI=1S/C9H12/c1-3-9-7-5-4-6-8(9)2/h4-7H,3H2,1-2H3
120	C9H12	1,2,4-Trimethylbenzene	NMOC_g	0.00899524	0.0163653		0.0289211	0.0632749	0.0104743		0.00732831	0.0261546				0.0265774	0.0155856	1	2	0	10	2	2	0	5	6	0	0	0	8	2		0.00102506		0.026851	0.00445477	0.0046669		0.00734513	0.0226241				0.0588735	0.00747956	InChI=1S/C9H12/c1-7-4-5-8(2)9(3)6-7/h4-6H,1-3H3
120	C9H12	1,3,5-Trimethylbenzene	NMOC_g		0.004933		0.0101803	0.0122201	0.00720597		0.00444234	0.0111049				0.00680582	0.021874	0	2	0	9	2	2	0	4	6	0	0	0	8	1		0.00260206		0.00856693	0.00459619	0.0072832		0.00514532	0.00898035				0.0149581		InChI=1S/C9H12/c1-7-4-8(2)6-9(3)5-7/h4-6H,1-3H3
120	C9H12	1,2,3-Trimethylbenzene	NMOC_g		0.0249929		0.0383453	0.053925	0.0124679		0.0044853	0.0140686				0.0749314	0.00989536	0	2	0	6	2	1	0	4	6	0	0	0	2	1		0.00139334		0.0246242	0.00268701			0.00515832	0.0108381				0.101496		InChI=1S/C9H12/c1-7-5-4-6-8(2)9(7)3/h4-6H,1-3H3
120	C9H12	Isopropylbenzene	NMOC_g	0.00674643	0.0132365		0.00577055	0.00443576	0.00415597		0.00747995	0.00813511				0.00110203	0.0138014	1	1	0	10	2	1	0	4	6	0	0	0	8	1				0.00364654	0.000282843			0.0134212	0.010058				0.000502921		InChI=1S/C9H12/c1-8(2)9-6-4-3-5-7-9/h3-8H,1-2H3
120	C9H12	C9H12 isomers	NMOC_g		0.00349094													0	1	0	0	0	0	0	0	0	0	0	0	0	0															1014.68_1.267
121	C3H7NO4	Propene hydroxynitrates	NMOC_g					0.00649458	0.000551175			0.00480531						0	0	0	0	1	1	0	0	1	0	0	0	0	0															121.07051_C3H7NO4
121	C3H7NO4	Propene hydroxynitrate	NMOC_g	0.002			0.00466698									0.00218784		1	0	0	3	0	0	0	0	0	0	0	0	3	0				0.00057735									0		InChI=1S/C3H7NO4/c1-2-3(4,5)8-6/h6H,2H2,1H3
121	C4H11NO3	unknown	NMOC_g				0.00216231	0.0039879	0.000413017			0.00421518				0.000846576		0	0	0	1	1	1	0	0	1	0	0	0	1	0															121.07316_C4H11NO3
121	C6H3NO2	unknown	NMOC_g				0.000958704	0.00239274	0.000241048			0.00109595				0.000634932		0	0	0	1	1	1	0	0	1	0	0	0	1	0															121.01616_C6H3O2N
121	C7H7NO	unknown	NMOC_g				0.00817506	0.0164074	0.00158736			0.032204				0.00677261		0	0	0	1	1	1	0	0	1	0	0	0	1	0															121.05216_C7H7NO
121	C8H11N	unknown	NMOC_g				0.00515528	0.00808974	0.000686419			0.0481374				0.00296302		0	0	0	1	1	1	0	0	1	0	0	0	1	0															121.08816_C8H11N
122	C7H6O2	Benzoic acids/hydroxybenzaldehyde	NMOC_g		0.02													0	1	0	0	0	0	0	0	0	0	0	0	0	0															122.123_C7H6O2
122	C7H6O2	1,3-Benzodioxole	NMOC_g		0.00507198											0.00132633		0	1	0	0	0	0	0	0	0	0	0	0	1	0															InChI=1S/C7H6O2/c1-2-4-7-6(3-1)8-5-9-7/h1-4H,5H2
122	C7H6O2	2-Hydroxybenzaldehyde (=salicylaldehyde)	NMOC_g	0.0659	0.106225		0.0722603	0.221772	0.0362355	0.030135	0.025763	0.0709837				0.0450451	0.034278	1	1	0	4	2	2	1	2	1	0	0	0	3	1				0.0420833	0.138836	0.0171447		0.0244352					0.0334548		InChI=1S/C7H6O2/c8-5-6-3-1-2-4-7(6)9/h1-5,9H
122	C9H14	unknown	NMOC_g	0.0178					0.0190609	0.0120996	0.0039853	0.097708					0.0455931	1	0	0	0	0	2	1	1	1	0	0	0	0	1						0.0160348									122.109027_C9H14
122	C9H14	Cyclohexylallene	NMOC_g		0.00814526													0	1	0	0	0	0	0	0	0	0	0	0	0	0															InChI=1S/C9H14/c1-2-6-9-7-4-3-5-8-9/h6,9H,1,3-5,7-8H2
122	C9H14	Santene	NMOC_g		0.181294													0	1	0	0	0	0	0	0	0	0	0	0	0	0															InChI=1S/C9H14/c1-6-7(2)9-4-3-8(6)5-9/h8-9H,3-5H2,1-2H3
122	C9H14	C9H14 isomers	NMOC_g		0.0177768		0.0427316	0.0725706								0.0129297		0	1	0	1	1	0	0	0	0	0	0	0	1	0															939.706_1.192
122	C8H10O	C2 phenols + methyl anisol	NMOC_g		0.015							0.382907						0	1	0	0	0	0	0	0	1	0	0	0	0	0															122.07216_C8H10O
122	C8H10O	2,5-Dimethyl phenol	NMOC_g	0.1329	0.128032		0.0862595	0.230127	0.0299081	0.0347009	0.0649321					0.100296	0.0289533	1	1	0	2	1	1	1	2	0	0	0	0	2	1				0.0723389				0.0722944					0.0901739		InChI=1S/C8H10O/c1-6-3-4-7(2)8(9)5-6/h3-5,9H,1-2H3
122	C8H10O	Phenol, 2,6-dimethyl-	NMOC_g													0.00618243		0	0	0	0	0	0	0	0	0	0	0	0	1	0															InChI=1S/C8H10O/c1-6-4-3-5-7(2)8(6)9/h3-5,9H,1-2H3
122	C8H10O	4-Methyl anisole	NMOC_g		0.00603154		0.0112898	0.0110673								0.00276582		0	1	0	1	1	0	0	0	0	0	0	0	1	0															InChI=1S/C8H10O/c1-7-3-5-8(9-2)6-4-7/h3-6H,1-2H3
122	C3H4Cl2	Trans-1,3-dichloropropene	NMOC_g													0.00045		0	0	0	0	0	0	0	0	0	0	0	0	2	0													7.07107e-05		InChI=1S/C3H4Cl2/c4-2-1-3-5/h1-2H,3H2/b2-1+
123	C6H5NO2	Nitrobenzene	NMOC_g				0.011029	0.0142425	0.00169316			0.0143316				0.00835994		0	0	0	1	1	1	0	0	1	0	0	0	1	0															InChI=1S/C6H5NO2/c8-7(9)6-4-2-1-3-5-6/h1-5H
123	C7H7O2	unknown	NMOC_g				0.0171102	0.00467154	0.000926011			0.00859898				0.00423288		0	0	0	1	1	1	0	0	1	0	0	0	1	0															123.04416_C7H8O2
123	C8H13N	unknown	NMOC_g				0.00556698	0.00877338	0.000515907			0.0303493				0.00359795		0	0	0	1	1	1	0	0	1	0	0	0	1	0															123.10416_C8H13N
123	C7H9NO	unknown	NMOC_g				0.00612367	0.00865944	0.000998003			0.0580852				0.0062435		0	0	0	1	1	1	0	0	1	0	0	0	1	0															123.06815999999999_C7H9NO
124	C6H4O3	unknown	NMOC_g							0.0595851	0.0180276						0.0161406	0	0	0	0	0	0	1	2	0	0	0	0	0	1								0.0123795							124.01552_C6H4O3
124	C6H4O3	Hydroxy benzoquinone	NMOC_g	0.13015	0.0410027		0.106727	0.086671	0.0626125			0.0393698				0.112532		1	1	0	6	1	2	0	0	1	0	0	0	5	0				0.0392885		0.0738811							0.0431391		InChI=1S/C6H4O3/c7-4-1-2-5(8)6(9)3-4/h1-3,9H
124	C6H5Cl	Chlorobenzene	NMOC_g	0.000456			0.00039611									0.0007695		1	0	0	5	0	0	0	0	0	0	0	0	2	0				0.000328399									0.000325976		InChI=1S/C6H5Cl/c7-6-4-2-1-3-5-6/h1-5H
124	C7H8O2	2-Propionylfuran	NMOC_g													0.00153038		0	0	0	0	0	0	0	0	0	0	0	0	1	0															InChI=1S/C7H8O2/c1-2-6(8)7-4-3-5-9-7/h3-5H,2H2,1H3
124	C7H8O2	2-Acetyl-5-methylfuran	NMOC_g													0.00193848		0	0	0	0	0	0	0	0	0	0	0	0	1	0															InChI=1S/C7H8O2/c1-5-3-4-7(9-5)6(2)8/h3-4H,1-2H3
124	C7H8O2	Guaiacol (=2-methoxyphenol)	NMOC_g	0.3713	0.114091		0.478292	0.348653	0.167145	0.0917747	0.0968585	0.673755				0.451739	0.0673912	2	3	0	8	3	3	1	2	1	0	0	0	7	1	0.114127	0.137827		0.308551	0.239925	0.159387		0.055775					0.30984		InChI=1S/C7H8O2/c1-9-7-5-3-2-4-6(7)8/h2-5,8H,1H3
124	C8H12O	unknown	NMOC_g				0.0486224	0.0730355	0.0108329			0.138258				0.0853984		0	0	0	1	1	1	0	0	1	0	0	0	1	0															124.08816_C8H12O
124	C8H12O	Furan, 4-methyl-2-propyl-	NMOC_g		0.0013708													0	1	0	0	0	0	0	0	0	0	0	0	0	0															InChI=1S/C8H12O/c1-3-4-8-5-7(2)6-9-8/h5-6H,3-4H2,1-2H3
124	C8H12O	1-Acetylcyclohexene	NMOC_g		0.078													0	1	0	0	0	0	0	0	0	0	0	0	0	0															InChI=1S/C8H12O/c1-7(9)8-5-3-2-4-6-8/h5H,2-4,6H2,1H3
124	C9H16	unknown	NMOC_g									0.0644923						0	0	0	0	0	0	0	0	1	0	0	0	0	0															124.12416_C9H16
124	C9H16	Nonadiene	NMOC_g				0.00347437		0.00261754									0	0	0	2	0	1	0	0	0	0	0	0	0	0				0.000989949											InChI=1S/C9H16/c1-3-5-7-9-8-6-4-2/h3,5,7H,1,4,6,8-9H2,2H3
124	C9H16	1,8-Nonadiene	NMOC_g		0.010144		0.0120347									0.00625092		0	1	0	1	0	0	0	0	0	0	0	0	1	0															InChI=1S/C9H16/c1-3-5-7-9-8-6-4-2/h3-4H,1-2,5-9H2
124	C9H16	C9H16 isomers	NMOC_g		0.00589446		0.0356584	0.0885653								0.0142878		0	1	0	1	1	0	0	0	0	0	0	0	1	0															999.686_1.109
124	C7H12N2	unknown	NMOC_g				0.00597725	0.00615276	0.000655521			0.000505822				0.00222226		0	0	0	1	1	1	0	0	1	0	0	0	1	0															124.09916_C7H12N2
125	C8H15N	C8 nitriles	NMOC_g				0.00064803	0.00444366				0.00606987				0.000423288		0	0	0	1	1	0	0	0	1	0	0	0	1	0															125.12016_C8H15N
125	C5H3NO3	unknown	NMOC_g				0.00279803	0.00148122	0.00112451			0.00151747				0.00211644		0	0	0	1	1	1	0	0	1	0	0	0	1	0															125.01116_C5H4NO3
125	C6H7NO2	unknown	NMOC_g				0.00907634	0.0211928	0.000830403			0.0977923				0.0103706		0	0	0	1	1	1	0	0	1	0	0	0	1	0															125.04716_C6H7NO2
125	C6H7NS	unknown	NMOC_g				0.00694168	0.005697	0.00245043			0.0167764				0.00560857		0	0	0	1	1	1	0	0	1	0	0	0	1	0															125.02916_C6H8NS
125	C7H11NO	unknown	NMOC_g				0.00243151	0.00387396	0.000343938			0.0349017				0.00211644		0	0	0	1	1	1	0	0	1	0	0	0	1	0															125.08315999999999_C7H11NO
125	C8H13O	unknown	NMOC_g				0.00168063	0.00262062	0.00020578			0.00177038				0.00126986		0	0	0	1	1	1	0	0	1	0	0	0	1	0															125.09616_C8H14O
126	C7H10O2	Unsaturated c6 cyclic carboxylic acid	NMOC_g	0.0145	0.0416278		0.0701722	0.0389675	0.0220708	0.0424629	0.0109192	0.178724				0.154297		1	2	0	2	1	2	1	2	1	0	0	0	2	0		0.0458598		0.00389827		0.00653534		0.00958205					0.088883		126.155_C7H10O2
126	C6H6O3	Methyl 2-furoate	NMOC_g													0.00163241		0	0	0	0	0	0	0	0	0	0	0	0	1	0															InChI=1S/C6H6O3/c1-8-6(7)5-3-2-4-9-5/h2-4H,1H3
126	C6H6O3	5-(Hydroxymethyl)-2-furfural	NMOC_g	0.3605	0.149241		0.284618	0.306978	0.0830841	0.045659	0.0406047	0.323895				0.213267	0.155915	1	2	0	3	2	2	1	2	1	0	0	0	2	1		0.197482		0.20172	0.0227532	0.0043707		0.0158452					0.0955799		InChI=1S/C6H6O3/c7-3-5-1-2-6(4-8)9-5/h1-3,8H,4H2
126	C2H6S3	Dimethyl trisulfide	NMOC_g				0.00106001	0.00045576	0.000139129			0.000168607						0	0	0	1	1	1	0	0	1	0	0	0	0	0															InChI=1S/C2H6S3/c1-3-5-4-2/h1-2H3
126	C7H10S	Trimethylthiophene	NMOC_g		0.011													0	1	0	0	0	0	0	0	0	0	0	0	0	0															InChI=1S/C7H10S/c1-5-4-8-7(3)6(5)2/h4H,1-3H3
126	C9H18	unknown	NMOC_g				0.00642468	0.0229019	0.00100092			0.0205701						0	0	0	1	1	1	0	0	1	0	0	0	0	0															126.14016_C9H18
126	C9H18	Cyclopentane, butyl-	NMOC_g		0.00233037		0.00323701	0.0149										0	1	0	1	1	0	0	0	0	0	0	0	0	0															InChI=1S/C9H18/c1-2-3-6-9-7-4-5-8-9/h9H,2-8H2,1H3
126	C9H18	2-Nonene, (e)-	NMOC_g		0.00233037		0.00369944	0.0213										0	1	0	1	1	0	0	0	0	0	0	0	0	0															InChI=1S/C9H18/c1-3-5-7-9-8-6-4-2/h3,5H,4,6-9H2,1-2H3/b5-3+
126	C9H18	Cis-2-nonene	NMOC_g				0.00265897	0.0115										0	0	0	1	1	0	0	0	0	0	0	0	0	0															InChI=1S/C9H18/c1-3-5-7-9-8-6-4-2/h3,5H,4,6-9H2,1-2H3/b5-3-
126	C9H18	1-Nonene	NMOC_g	0.024	0.0313914		0.0132896	0.1432	0.00715							0.0116927		1	1	0	8	1	2	0	0	0	0	0	0	4	0				0.00620383		0.00445477							0.00439427		InChI=1S/C9H18/c1-3-5-7-9-8-6-4-2/h3H,1,4-9H2,2H3
126	C9H18	4-Nonene, e	NMOC_g				0.00219654	0.0096										0	0	0	1	1	0	0	0	0	0	0	0	0	0															InChI=1S/C9H18/c1-3-5-7-9-8-6-4-2/h7,9H,3-6,8H2,1-2H3/b9-7+
126	C9H18	Cis-4-nonene	NMOC_g		0.0013708		0.00289019	0.0147										0	1	0	1	1	0	0	0	0	0	0	0	0	0															InChI=1S/C9H18/c1-3-5-7-9-8-6-4-2/h7,9H,3-6,8H2,1-2H3/b9-7-
126	C9H18	Cyclohexane, 1,1,3-trimethyl-	NMOC_g					0.0129										0	0	0	0	1	0	0	0	0	0	0	0	0	0															InChI=1S/C9H18/c1-8-5-4-6-9(2,3)7-8/h8H,4-7H2,1-3H3
126	C9H18	C9H18 isomers	NMOC_g		0.00452366		0.0016185	0.0572								0.00145221		0	1	0	1	1	0	0	0	0	0	0	0	1	0															974.694_1.043
126	C8H14O	unknown	NMOC_g				0.0414553	0.0458039	0.0050696			0.0496549				0.0284661		0	0	0	1	1	1	0	0	1	0	0	0	1	0															126.10416_C8H14O
126	C8H14O	Octenone	NMOC_g		0.0027													0	1	0	0	0	0	0	0	0	0	0	0	0	0															InChI=1S/C8H14O/c1-3-4-5-6-7-8(2)9/h6-7H,3-5H2,1-2H3
127	C10H7	unknown	NMOC_g				0.00325903	0.00364608	0.00135942			0.00893619				0.0019048		0	0	0	1	1	1	0	0	1	0	0	0	1	0															127.05416000000001_C10H8
127	C6H9NO2	unknown	NMOC_g				0.00455918	0.0091152	0.000480639			0.0343116				0.00465617		0	0	0	1	1	1	0	0	1	0	0	0	1	0															127.06316_C6H9NO2
127	C7H13NO	unknown	NMOC_g				0.00104505	0.0011394	0.000137187			0.00994784				0.000952399		0	0	0	1	1	1	0	0	1	0	0	0	1	0															127.09916_C7H13NO
127	C8H17N	unknown	NMOC_g				0.000523216	0.00102546	0.000138158			0.00379367				0.00052911		0	0	0	1	1	1	0	0	1	0	0	0	1	0															127.13516_C8H17N
128	C7H12O2	unknown	NMOC_g				0.0143501	0.0202813	0.00123905			0.0225934				0.0166141		0	0	0	1	1	1	0	0	1	0	0	0	1	0															128.08316000000002_C7H12O2
128	C7H12O2	Cyclohexanoic acid	NMOC_g		0.005													0	1	0	0	0	0	0	0	0	0	0	0	0	0															InChI=1S/C7H12O2/c8-7(9)6-4-2-1-3-5-6/h6H,1-5H2,(H,8,9)
128	C10H8	4-Phenylbut-3-ene-1-yne	NMOC_g		0.00466074		0.00612719									0.00132633		0	1	0	1	0	0	0	0	0	0	0	0	1	0															InChI=1S/C10H8/c1-2-3-7-10-8-5-4-6-9-10/h1,3-9H/b7-3+
128	C10H8	Naphthalene	NMOC_g	0.1906	0.142712		0.198623	0.110613	0.1161	0.636715	0.0638724	0.0571579				0.0405592	0.195043	2	3	0	10	3	3	1	2	1	0	0	0	11	2	0.0769332	0.142226		0.227586	0.0832803	0.0567046		0.0183342					0.0435476	0.136521	InChI=1S/C10H8/c1-2-6-10-8-4-3-7-9(10)5-1/h1-8H
128	C6H8O3	2,5-Di(hydroxymethyl)furan + methyl hydroxy dihydrofurfural	NMOC_g		0.0044		0.229581	0.0699592	0.0369562			0.28638				0.200956		0	1	0	1	1	1	0	0	1	0	0	0	1	0															128.04716000000002_C6H8O3
128	C8H16O	unknown	NMOC_g				0.01904	0.0194837	0.00183132			0.0340587				0.0197887		0	0	0	1	1	1	0	0	1	0	0	0	1	0															128.11916000000002_C8H16O
128	C8H16O	Octanal	NMOC_g		0.00356409													0	1	0	0	0	0	0	0	0	0	0	0	0	0															InChI=1S/C8H16O/c1-2-3-4-5-6-7-8-9/h8H,2-7H2,1H3
128	C8H16O	Octanone	NMOC_g		0.0028													0	1	0	0	0	0	0	0	0	0	0	0	0	0															InChI=1S/C8H16O/c1-3-4-5-6-7-8(2)9/h3-7H2,1-2H3
128	C9H20	unknown	NMOC_g				0.00390056	0.0039879	0.00141976			0.0045524						0	0	0	1	1	1	0	0	1	0	0	0	0	0															128.15616_C9H20
128	C9H20	Nonane	NMOC_g	0.008	0.0105552		0.0161367	0.12165	0.0105		0.0223585	0.0267918				0.0044627	0.0724	1	2	0	10	2	2	0	3	4	0	0	0	8	1		0.00290792		0.00763792	0.045467	0.00353553		0.0291024	0.00954229				0.00459525		InChI=1S/C9H20/c1-3-5-7-9-8-6-4-2/h3-9H2,1-2H3
128	C9H20	Octane, 2-methyl-	NMOC_g					0.0059										0	0	0	0	1	0	0	0	0	0	0	0	0	0															InChI=1S/C9H20/c1-4-5-6-7-8-9(2)3/h9H,4-8H2,1-3H3
128	C9H20	Octane, 3-methyl-	NMOC_g					0.0057										0	0	0	0	1	0	0	0	0	0	0	0	0	0															InChI=1S/C9H20/c1-4-6-7-8-9(3)5-2/h9H,4-8H2,1-3H3
128	C9H20	Heptane, 2,3-dimethyl-	NMOC_g					0.0063										0	0	0	0	1	0	0	0	0	0	0	0	0	0															InChI=1S/C9H20/c1-5-6-7-9(4)8(2)3/h8-9H,5-7H2,1-4H3
128	C9H20	Heptane, 2,6-dimethyl-	NMOC_g				0.00184972	0.0135										0	0	0	1	1	0	0	0	0	0	0	0	0	0															InChI=1S/C9H20/c1-8(2)6-5-7-9(3)4/h8-9H,5-7H2,1-4H3
129	C9H7N	unknown	NMOC_g				0.00587572	0.0108243	0.00162117			0.0257126				0.00201062		0	0	0	1	1	1	0	0	1	0	0	0	1	0															129.05716_C9H8N
129	C7H15NO	unknown	NMOC_g				0.000862029	0.00239274	0.000137187			0.00615417				0.00052911		0	0	0	1	1	1	0	0	1	0	0	0	1	0															129.11516_C7H15NO
129	C4H3NO4	unknown	NMOC_g				0.000532456	0.00034182	0.000138158			0.000758733				0.000423288		0	0	0	1	1	1	0	0	1	0	0	0	1	0															129.00516000000002_C4H3NO4
129	C5H7NO3	unknown	NMOC_g				0.00362627	0.00432972	0.00100237			0.0127299				0.00370377		0	0	0	1	1	1	0	0	1	0	0	0	1	0															129.04216000000002_C5H7NO3
130	CHCl3	Trichloromethane	NMOC_g	0.012		0.0006	0.000241864								0.0003	0.000833333		1	0	1	2	0	0	0	0	0	0	0	1	3	0				0.000223639									0.000585947		InChI=1S/CHCl3/c2-1(3)4/h1H
130	C10H10	Dihydronaphthalene	NMOC_g	0.0414					0.0125659	0.0607265		0.043585						1	0	0	0	0	3	1	0	1	0	0	0	0	0						0.00641075									130.07816_C10H10
130	C10H10	C10H10 isomers	NMOC_g		0.0506706		0.0260434	0.0578334								0.0150925		0	1	0	1	1	0	0	0	0	0	0	0	1	0															1634.48_2.103
130	C5H6O4	unknown	NMOC_g				0.0182677	0.0282571	0.00327032			0.0145002				0.0166141		0	0	0	1	1	1	0	0	1	0	0	0	1	0															130.02616_C5H6O4
130	C6H10O3	unknown	NMOC_g				0.0233374	0.00888732	0.00436393			0.0326255				0.0306884		0	0	0	1	1	1	0	0	1	0	0	0	1	0															130.06216_C6H10O3
130	C7H14O2	unknown	NMOC_g				0.0118545	0.0230159	0.00117434			0.0257126				0.0052911		0	0	0	1	1	1	0	0	1	0	0	0	1	0															130.09916_C7H14O2
130	C7H14O2	Amyl acetate	NMOC_g		0.0031													0	1	0	0	0	0	0	0	0	0	0	0	0	0															InChI=1S/C7H14O2/c1-3-4-5-6-9-7(2)8/h3-6H2,1-2H3
130	C8H18O	unknown	NMOC_g				0.00182826	0.0011394	0.000279229			0.0021919				0.00243391		0	0	0	1	1	1	0	0	1	0	0	0	1	0															130.13516_C8H18O
130	CF2Cl2	Dichlorodifluoromethane	NMOC_g			0.0028												0	0	1	0	0	0	0	0	0	0	0	0	0	0															InChI=1S/CCl2F2/c2-1(3,4)5
130	C9H6O	unknown	NMOC_g				0.021036	0.00672246	0.00990596			0.0168607				0.00846576		0	0	0	1	1	1	0	0	1	0	0	0	1	0															130.04116000000002_C9H6O
131	C3HNO5	unknown	NMOC_g				0.000214364	0.00022788				0.000421518				0.000105822		0	0	0	1	1	0	0	0	1	0	0	0	1	0															130.98516_C3HO5N
131	C9H9N	Methyl benzeneacetonitrile	NMOC_g				0.00722632	0.0110522	0.0011347			0.0339744				0.00402124		0	0	0	1	1	1	0	0	1	0	0	0	1	0															InChI=1S/C9H9N/c1-8(7-10)9-5-3-2-4-6-9/h2-6,8H,1H3
131	C8H5NO	unknown	NMOC_g				0.0012772	0.00079758	0.000345394			0.00185468				0.000846576		0	0	0	1	1	1	0	0	1	0	0	0	1	0															131.03616000000002_C8H5ON
131	C5H9NO3	unknown	NMOC_g				0.00307519	0.00421578	0.000551175			0.0102007				0.00296302		0	0	0	1	1	1	0	0	1	0	0	0	1	0															131.05816000000002_C5H9NO3
132	C6H12O3	C6- hydroxy-carboxylic acids	NMOC_g		0.0017													0	1	0	0	0	0	0	0	0	0	0	0	0	0															132.159_C6H12O3
132	C4H4O5	unknown	NMOC_g				0.00112903	0.00045576	0.000138158			0.00067443				0.00052911		0	0	0	1	1	1	0	0	1	0	0	0	1	0															132.00516000000002_C4H4O5
132	C10H12	Methyl propenyl benzene + ethyl styrene	NMOC_g		0.0083		0.0199028		0.0055101			0.0569893						0	1	0	5	0	2	0	0	1	0	0	0	0	0				0.0220324		0.00171135									132.09316_C10H12
132	C10H12	Benzene, (1-methyl-1-propenyl)-, (e)-	NMOC_g				0.0108333		0.0321									0	0	0	3	0	1	0	0	0	0	0	0	0	0				0.00490951											InChI=1S/C10H12/c1-3-9(2)10-7-5-4-6-8-10/h3-8H,1-2H3/b9-3+
132	C10H12	O-isopropenyltoluene	NMOC_g		0.00301577		0.00450869											0	1	0	1	0	0	0	0	0	0	0	0	0	0															InChI=1S/C10H12/c1-8(2)10-7-5-4-6-9(10)3/h4-7H,1H2,2-3H3
132	C10H12	C10H12 isomers	NMOC_g		0.0730639		0.0862431	0.084866								0.00961745		0	1	0	1	1	0	0	0	0	0	0	0	1	0															1519.52_1.769
132	C5H8O4	unknown	NMOC_g				0.0183817	0.0085455	0.00491511			0.0315296				0.0271963		0	0	0	1	1	1	0	0	1	0	0	0	1	0															132.04216000000002_C5H8O4
132	C9H8O	Methylbenzofurans	NMOC_g	0.0078	0.0180226		0.0699735	0.0830915	0.041523			0.0833764				0.0275049		1	2	0	6	2	2	0	0	1	0	0	0	2	0		0.0113457		0.039176	0.0302521	0.0323529							0.0181207		132.05716_C9H8O
133	C4H7NO4	Butadiene hydroxynitrates	NMOC_g				0.014											0	0	0	1	0	0	0	0	0	0	0	0	0	0															133.08150999999998_C4H7NO4
133	C5H11NO3	2-Pentyl nitrate	NMOC_g		0.000592701		0.000728037					0.0002						0	2	0	2	0	0	0	0	1	0	0	0	0	0		0.000131099		0.000605336											InChI=1S/C5H11NO3/c1-3-4-5(2)9-6(7)8/h5H,3-4H2,1-2H3
133	C5H11NO3	3-Pentyl nitrate	NMOC_g		0.000542701		0.000678037	0.0018				0.0002						0	2	0	2	1	0	0	0	1	0	0	0	0	0		0.00020181		0.000676046											InChI=1S/C5H11NO3/c1-3-5(4-2)9-6(7)8/h5H,3-4H2,1-2H3
133	C5H11NO3	3-Methylbutan-2-yl nitrate	NMOC_g		0.000711241		0.00115607	0.0228										0	2	0	1	1	0	0	0	0	0	0	0	0	0		0.000157319													InChI=1S/C5H11NO3/c1-4(2)5(3)9-6(7)8/h4-5H,1-3H3
133	C5H11NO3	3-Methyl-2-butyl nitrate	NMOC_g				0.0004											0	0	0	1	0	0	0	0	0	0	0	0	0	0															InChI=1S/C5H11NO3/c1-5(2)3-4-9-6(7)8/h5H,3-4H2,1-2H3
133	C7H19NO	unknown	NMOC_g				0.000629128	0.00102546	0.000138158			0.0023605				0.00052911		0	0	0	1	1	1	0	0	1	0	0	0	1	0															133.14616_C7H19NO
133	C8H7NO	unknown	NMOC_g				0.004664	0.0108243	0.000686419			0.0284947				0.00306884		0	0	0	1	1	1	0	0	1	0	0	0	1	0															133.05216000000001_C8H7NO
133	C9H11N	unknown	NMOC_g				0.00137625	0.00136728	0.000241048			0.0121397				0.00105822		0	0	0	1	1	1	0	0	1	0	0	0	1	0															133.08816000000002_C9H11N
134	C10H14	Methyl-n-Propylbenzene isomers	NMOC_g		0.024		0.0304159		0.0174722			0.0684546						0	1	0	5	0	2	0	0	1	0	0	0	0	0				0.0226765		0.0147943									134.109550447_C10H14
134	C10H14	1-Butenylbenzene	NMOC_g				0.00293333		0.0025									0	0	0	3	0	1	0	0	0	0	0	0	0	0				0.00116762											InChI=1S/C10H12/c1-2-3-7-10-8-5-4-6-9-10/h3-9H,2H2,1H3
134	C10H14	N-butylbenzene	NMOC_g		0.00904731		0.011384	0.0199639	0.0066							0.000833262		0	1	0	4	1	1	0	0	0	0	0	0	1	0				0.00141101											InChI=1S/C10H14/c1-2-3-7-10-8-5-4-6-9-10/h4-6,8-9H,2-3,7H2,1H3
134	C10H14	1,2,3,4,5,8-Hexahydronaphthalene	NMOC_g				0.00415		0.0024									0	0	0	2	0	1	0	0	0	0	0	0	0	0				0.000919239											InChI=1S/C10H14/c1-2-6-10-8-4-3-7-9(10)5-1/h1-2H,3-8H2
134	C10H14	Benzene, 1-methyl-4-propyl-	NMOC_g		0.00328993		0.00358383	0.00735514								0.000486069		0	1	0	1	1	0	0	0	0	0	0	0	1	0															InChI=1S/C10H14/c1-3-4-10-7-5-9(2)6-8-10/h5-8H,3-4H2,1-2H3
134	C10H14	Benzene, 1-methyl-3-propyl-	NMOC_g		0.00411241		0.00497112	0.0107875								0.000694385		0	1	0	1	1	0	0	0	0	0	0	0	1	0															InChI=1S/C10H14/c1-3-5-10-7-4-6-9(2)8-10/h4,6-8H,3,5H2,1-2H3
134	C10H14	Benzene, 1-methyl-2-propyl-	NMOC_g		0.00411241		0.00531794	0.0145001								0.000486069		0	1	0	1	1	0	0	0	0	0	0	0	1	0															InChI=1S/C10H14/c1-3-6-10-8-5-4-7-9(10)2/h4-5,7-8H,3,6H2,1-2H3
134	C10H14	1,4-Diethylbenzene	NMOC_g		0.00246745		0.00333035		0.0015							0.000416631		0	1	0	4	0	1	0	0	0	0	0	0	1	0				0.00167314											InChI=1S/C10H14/c1-3-9-5-7-10(4-2)8-6-9/h5-8H,3-4H2,1-2H3
134	C10H14	1,3-Dimethyl-4-ethylbenzene	NMOC_g		0.00466074		0.00554916	0.0109276								0.0009027		0	1	0	1	1	0	0	0	0	0	0	0	1	0															InChI=1S/C10H14/c1-4-10-6-5-8(2)7-9(10)3/h5-7H,4H2,1-3H3
134	C10H14	Benzene, 4-ethyl-1,2-dimethyl-	NMOC_g		0.00328993		0.00450869	0.00917641								0.000763823		0	1	0	1	1	0	0	0	0	0	0	0	1	0															InChI=1S/C10H14/c1-4-10-6-5-8(2)9(3)7-10/h5-7H,4H2,1-3H3
134	C10H14	Benzene, 5-ethyl-1,3-dimethyl-	NMOC_g		0.00438658		0.00427747	0.00679475								0.000763823		0	1	0	1	1	0	0	0	0	0	0	0	1	0															InChI=1S/C10H14/c1-4-10-6-8(2)5-9(3)7-10/h5-7H,4H2,1-3H3
134	C10H14	1,2-Dimethyl-3-ethylbenzene	NMOC_g		0.00301577		0.00335261									0.000416631		0	1	0	1	0	0	0	0	0	0	0	0	1	0															InChI=1S/C10H14/c1-4-10-7-5-6-8(2)9(10)3/h5-7H,4H2,1-3H3
134	C10H14	Benzene, 2-ethyl-1,4-dimethyl-	NMOC_g		0.00301577		0.00358383	0.00714499								0.000555508		0	1	0	1	1	0	0	0	0	0	0	0	1	0															InChI=1S/C10H14/c1-4-10-7-8(2)5-6-9(10)3/h5-7H,4H2,1-3H3
134	C10H14	Benzene, 2-ethyl-1,3-dimethyl-	NMOC_g				0.00277458	0.00455318										0	0	0	1	1	0	0	0	0	0	0	0	0	0															InChI=1S/C10H14/c1-4-10-8(2)6-5-7-9(10)3/h5-7H,4H2,1-3H3
134	C10H14	Benzene, 1,2,3,4-tetramethyl-	NMOC_g					0.0249374										0	0	0	0	1	0	0	0	0	0	0	0	0	0															InChI=1S/C10H14/c1-7-5-6-8(2)10(4)9(7)3/h5-6H,1-4H3
134	C10H14	1,2,3,5-Tetramethylbenzene	NMOC_g		0.00973271		0.00878616	0.0155509								0.00118045		0	1	0	1	1	0	0	0	0	0	0	0	1	0															InChI=1S/C10H14/c1-7-5-8(2)10(4)9(3)6-7/h5-6H,1-4H3
134	C10H14	M-cymene	NMOC_g		0.0105552		0.0141041	0.00427299								0.000416631		0	1	0	1	1	0	0	0	0	0	0	0	1	0															InChI=1S/C10H14/c1-8(2)10-6-4-5-9(3)7-10/h4-8H,1-3H3
134	C10H14	P-cymene	NMOC_g	0.0021	0.143467		0.0825402	0.0748305	0.0785602	0.00410931						0.0118295	0.0466239	1	2	0	6	2	2	1	0	0	0	0	0	2	2		0.127481		0.100145	0.0994192	0.0543621							0.0201011	0.00291899	InChI=1S/C10H14/c1-8(2)10-6-4-9(3)5-7-10/h4-8H,1-3H3
134	C10H14	O-cymene	NMOC_g		0.00191913													0	1	0	0	0	0	0	0	0	0	0	0	0	0															InChI=1S/C10H14/c1-8(2)10-7-5-4-6-9(10)3/h4-8H,1-3H3
134	C10H14	Isobutylbenzene	NMOC_g		0.00315285		0.0076	0.00455318	0.0051									0	1	0	3	1	1	0	0	0	0	0	0	0	0				0.0003											InChI=1S/C10H14/c1-9(2)8-10-6-4-3-5-7-10/h3-7,9H,8H2,1-2H3
134	C10H14	C10H14 isomers	NMOC_g		0.0141193		0.0211562											0	1	0	1	0	0	0	0	0	0	0	0	0	0															1169.63_1.267
134	C4H6O5	unknown	NMOC_g				0.00283619	0.00421578	0.00062171			0.00396227				0.00338631		0	0	0	1	1	1	0	0	1	0	0	0	1	0															134.02116_C4H6O5
134	C8H6O2	unknown	NMOC_g	0.0038			0.0307182	0.0292237	0.0107925	0.0102733	0.00202277	0.0386111				0.0248114	0.0083199	1	0	0	2	2	2	1	2	1	0	0	0	2	1				0.00351589	0.00314481	0.000233543		7.01275e-05					0.00696444		134.03616000000002_C8H6O2
134	C8H6O2	Phthalic acid	NMOC_g		0.0154441													0	1	0	0	0	0	0	0	0	0	0	0	0	0															InChI=1S/C8H6O4/c9-7(10)5-3-1-2-4-6(5)8(11)12/h1-4H,(H,9,10)(H,11,12)
134	C9H10O	unknown	NMOC_g	0.0223						0.0159807	0.00512352						0.00615673	1	0	0	0	0	0	1	2	0	0	0	0	0	1								0.00222285							134.072641_C9H10O
134	C9H10O	Benzene, 1-ethenyl-4-methoxy-	NMOC_g													0.000862484		0	0	0	0	0	0	0	0	0	0	0	0	1	0															InChI=1S/C9H10O/c1-3-8-4-6-9(10-2)7-5-8/h3-7H,1H2,2H3
134	C9H10O	4-Methylacetophenone	NMOC_g		0.0358756													0	1	0	0	0	0	0	0	0	0	0	0	0	0															InChI=1S/C9H10O/c1-7-3-5-9(6-4-7)8(2)10/h3-6H,1-2H3
134	C9H10O	3-Methylacetophenone	NMOC_g				0.0520729	0.0546262	0.0117335			0.0720797				0.0237958		0	0	0	2	1	1	0	0	1	0	0	0	2	0				0.00709213									0.0239904		InChI=1S/C9H10O/c1-7-4-3-5-9(6-7)8(2)10/h3-6H,1-2H3
135	C4H9NO4	Butene hydroxynitrates	NMOC_g	0.003			0.0102908	0.00432972	0.000792222			0.0325412				0.00585985		1	0	0	5	1	1	0	0	1	0	0	0	4	0				0.0105363									0.00520468		135.09716999999998_C4H9NO4
135	C9H13N	unknown	NMOC_g				0.00289716	0.00319032	0.000274859			0.0204858				0.00126986		0	0	0	1	1	1	0	0	1	0	0	0	1	0															135.10416_C9H13N
135	C8H9NO	unknown	NMOC_g				0.00446896	0.0074061	0.000687876			0.0271458				0.00201062		0	0	0	1	1	1	0	0	1	0	0	0	1	0															135.06816_C8H9NO
135	C7H5NO2	unknown	NMOC_g				0.00370122	0.00319032	0.000448285			0.0143316				0.00582021		0	0	0	1	1	1	0	0	1	0	0	0	1	0															135.03116_C7H5O2N
136	C10H16	Monoterpenes	NMOC_g		0.310902					0.12054								0	2	0	0	0	0	1	0	0	0	0	0	0	0		0.140146													136.124677_C10H16
136	C10H16	1,3-Cyclohexadiene, 5-butyl-	NMOC_g		0.00178205													0	1	0	0	0	0	0	0	0	0	0	0	0	0															InChI=1S/C10H16/c1-2-3-7-10-8-5-4-6-9-10/h4-6,8,10H,2-3,7,9H2,1H3
136	C10H16	(e)-ocimene	NMOC_g		0.00603154		0.00481469											0	1	0	1	0	0	0	0	0	0	0	0	0	0															InChI=1S/C10H16/c1-5-10(4)8-6-7-9(2)3/h5,7-8H,1,6H2,2-4H3/b10-8+
136	C10H16	Z-ocimene	NMOC_g				0.0341486											0	0	0	1	0	0	0	0	0	0	0	0	0	0															InChI=1S/C10H16/c1-5-10(4)8-6-7-9(2)3/h5,7-8H,1,6H2,2-4H3/b10-8-
136	C10H16	Myrcene	NMOC_g	0.00755	0.172036		0.0460923	0.00747802	0.00920079							0.00444563		1	1	0	8	1	1	0	0	0	0	0	0	2	0				0.0826274									0.00141421		InChI=1S/C10H16/c1-5-10(4)8-6-7-9(2)3/h5,7H,1,4,6,8H2,2-3H3
136	C10H16	Allo-ocimene or a-pyronene	NMOC_g		0.00891023		0.00784616											0	1	0	1	0	0	0	0	0	0	0	0	0	0															InChI=1S/C10H16/c1-5-10(4)8-6-7-9(2)3/h5-8H,1-4H3/b8-6+,10-5+
136	C10H16	A-thujene	NMOC_g				0.00793532											0	0	0	1	0	0	0	0	0	0	0	0	0	0															InChI=1S/C10H16/c1-7(2)10-5-4-8(3)9(10)6-10/h4,7,9H,5-6H2,1-3H3
136	C10H16	Sabinene	NMOC_g		0.0305689		0.00463637											0	1	0	1	0	0	0	0	0	0	0	0	0	0															InChI=1S/C10H16/c1-7(2)10-5-4-8(3)9(10)6-10/h7,9H,3-6H2,1-2H3
136	C10H16	Alpha-pinene	NMOC_g	0.02265	0.5233		0.102634	0.0831849	0.0147032		0.00887198	0.168312				0.00698343	0.0460395	1	2	0	10	2	1	0	5	5	0	0	0	9	1		0.405454		0.0820528	0.106066			0.015405	0.308646				0.0131927		InChI=1S/C10H16/c1-7-4-5-8-6-9(7)10(8,2)3/h4,8-9H,5-6H2,1-3H3
136	C10H16	Beta-pinene	NMOC_g	0.0129429	0.421138		0.0678884	0.150746	0.0119971		0.0153701	0.20722				0.0169757	0.0355976	1	2	0	9	2	1	0	3	3	0	0	0	3	2		0.422655		0.0791751	0.197495			0.0257593	0.270547				0.0126623	0.00554059	InChI=1S/C10H16/c1-7-4-5-8-6-9(7)10(8,2)3/h8-9H,1,4-6H2,2-3H3
136	C10H16	3-Carene	NMOC_g		0.189994		0.0670889		0.0170485									0	1	0	4	0	1	0	0	0	0	0	0	0	0				0.0877431											InChI=1S/C10H16/c1-7-4-5-8-9(6-7)10(8,2)3/h4,8-9H,5-6H2,1-3H3
136	C10H16	4-Carene	NMOC_g				0.00694115											0	0	0	1	0	0	0	0	0	0	0	0	0	0															InChI=1S/C10H16/c1-7-4-5-8-9(6-7)10(8,2)3/h4-5,7-9H,6H2,1-3H3
136	C10H16	À-fenchene	NMOC_g		0.00685402		0.00784616											0	1	0	1	0	0	0	0	0	0	0	0	0	0															InChI=1S/C10H16/c1-7-6-8-4-5-9(7)10(8,2)3/h8-9H,1,4-6H2,2-3H3
136	C10H16	Camphene	NMOC_g	0.0118643	0.606444		0.0284422		0.00856936							0.00555703		1	1	0	9	0	1	0	0	0	0	0	0	2	0				0.0227166									0.00141421		InChI=1S/C10H16/c1-7-8-4-5-9(6-8)10(7,2)3/h8-9H,1,4-6H2,2-3H3
136	C10H16	Limonene	NMOC_g														0.0403306	0	0	0	0	0	0	0	0	0	0	0	0	0	1															InChI=1S/C10H16/c1-8(2)10-6-4-9(3)5-7-10/h4,10H,1,5-7H2,2-3H3
136	C10H16	D-limonene	NMOC_g		0.308979		0.371021		0.0224607							0.0113286		0	1	0	5	0	1	0	0	0	0	0	0	5	0				0.608712									0.00592793		InChI=1S/C10H16/c1-8(2)10-6-4-9(3)5-7-10/h4,10H,1,5-7H2,2-3H3/t10-/m0/s1
136	C10H16	B-phellandrene	NMOC_g		0.0641537		0.0218444									0.00107167		0	1	0	1	0	0	0	0	0	0	0	0	1	0															InChI=1S/C10H16/c1-8(2)10-6-4-9(3)5-7-10/h4,6,8,10H,3,5,7H2,1-2H3
136	C10H16	Alpha terpinene	NMOC_g		0.0224812		0.00971854											0	1	0	1	0	0	0	0	0	0	0	0	0	0															InChI=1S/C10H16/c1-8(2)10-6-4-9(3)5-7-10/h4,6,8H,5,7H2,1-3H3
136	C10H16	Isolimonene	NMOC_g				0.0044281		0.000270611									0	0	0	3	0	1	0	0	0	0	0	0	0	0				0.00288444											InChI=1S/C10H16/c1-8(2)10-6-4-9(3)5-7-10/h4,6,9-10H,1,5,7H2,2-3H3
136	C10H16	Gamma-terpinene	NMOC_g		0.00822483		0.00647343		0.0047808									0	1	0	4	0	1	0	0	0	0	0	0	0	0				0.00332735											InChI=1S/C10H16/c1-8(2)10-6-4-9(3)5-7-10/h4,7-8H,5-6H2,1-3H3
136	C10H16	À-phellandrene	NMOC_g		0.0172721		0.0147116											0	1	0	1	0	0	0	0	0	0	0	0	0	0															InChI=1S/C10H16/c1-8(2)10-6-4-9(3)5-7-10/h4-6,8,10H,7H2,1-3H3
136	C10H16	Terpinolene	NMOC_g		0.0525018		0.0150307		0.00613386									0	1	0	4	0	1	0	0	0	0	0	0	0	0				0.0161535											InChI=1S/C10H16/c1-8(2)10-6-4-9(3)5-7-10/h4H,5-7H2,1-3H3
136	C10H16	B-pyronene	NMOC_g		0.0250857													0	1	0	0	0	0	0	0	0	0	0	0	0	0															InChI=1S/C10H16/c1-8-6-5-7-10(3,4)9(8)2/h5-6H,7H2,1-4H3
136	C10H16	Pyronene?	NMOC_g				0.00240735											0	0	0	1	0	0	0	0	0	0	0	0	0	0															InChI=1S/C10H16/c1-8-6-5-7-10(3,4)9(8)2/h5-7,9H,1-4H3
136	C10H16	Gamma pyronene	NMOC_g		0.0233037		0.00784616									0.000595375		0	1	0	1	0	0	0	0	0	0	0	0	1	0															InChI=1S/C10H16/c1-8-6-5-7-10(3,4)9(8)2/h6H,2,5,7H2,1,3-4H3
136	C10H16	Tricyclene	NMOC_g	0.00539286	0.275258		0.0080629									0.00722414		1	1	0	4	0	0	0	0	0	0	0	0	2	0				0.00931285									0.00494975		InChI=1S/C10H16/c1-9(2)6-4-7-8(5-6)10(7,9)3/h6-8H,4-5H2,1-3H3
136	C10H16	Bornylene	NMOC_g		0.011926													0	1	0	0	0	0	0	0	0	0	0	0	0	0															InChI=1S/C10H16/c1-9(2)8-4-6-10(9,3)7-5-8/h4,6,8H,5,7H2,1-3H3
136	C10H16	C10H16 isomers	NMOC_g		0.0747089		0.0557256									0.00250057		0	1	0	1	0	0	0	0	0	0	0	0	1	0															1069.66_1.091
136	C9H12O	unknown	NMOC_g	0.0069			0.0365576		0.010967			0.139691						1	0	0	2	0	2	0	0	1	0	0	0	0	0				0.038625		0.000335188									136.08816000000002_C9H12O
136	C9H12O	4-Ethyl anisole	NMOC_g													0.0305207		0	0	0	0	0	0	0	0	0	0	0	0	1	0															InChI=1S/C9H12O/c1-3-8-4-6-9(10-2)7-5-8/h4-7H,3H2,1-2H3
136	C9H12O	2,3-Dimethylanisole	NMOC_g					0.0438263										0	0	0	0	1	0	0	0	0	0	0	0	0	0															InChI=1S/C9H12O/c1-7-5-4-6-9(10-3)8(7)2/h4-6H,1-3H3
136	C8H8O2	unknown	NMOC_g	0.0397						0.0424629	0.00876715						0.00732151	1	0	0	0	0	0	1	2	0	0	0	0	0	1								0.00653857							136.051906_C8H8O2
136	C8H8O2	Benzoic acid, methyl ester	NMOC_g				0.0147793	0.00430866										0	0	0	1	1	0	0	0	0	0	0	0	0	0															InChI=1S/C8H8O2/c1-10-8(9)7-5-3-2-4-6-7/h2-6H,1H3
136	C8H8O2	Methyl benzoic acid	NMOC_g		0.063499		0.0752739	0.089811	0.0234256			0.121735				0.0800619		0	1	0	2	1	1	0	0	1	0	0	0	1	0				0.0314975											InChI=1S/C8H8O2/c1-6-4-2-3-5-7(6)8(9)10/h2-5H,1H3,(H,9,10)
136	C8H8O2	Acetic acid, phenyl ester	NMOC_g													0.000697759		0	0	0	0	0	0	0	0	0	0	0	0	1	0															InChI=1S/C8H8O2/c1-7(9)10-8-5-3-2-4-6-8/h2-6H,1H3
136	C7H4O3	unknown	NMOC_g				0.0045426	0.00205092	0.00113616			0.0045524				0.00296302		0	0	0	1	1	1	0	0	1	0	0	0	1	0															136.01516_C7H4O3
136	C7H4OS	unknown	NMOC_g				0.00188924	0.00148122	0.000276316			0.00193899				0.00179898		0	0	0	1	1	1	0	0	1	0	0	0	1	0															135.99816_C7H4OS
137	C4H11NO4	unknown	NMOC_g				0.00806816	0.00307638	0.000654065			0.0112967				0.00370377		0	0	0	1	1	1	0	0	1	0	0	0	1	0															137.06816_C4H11NO4
137	C8H11NO	unknown	NMOC_g				0.00263794	0.00330426	0.000515907			0.0330471				0.00317466		0	0	0	1	1	1	0	0	1	0	0	0	1	0															137.08316000000002_C8H11NO
137	C7H7NO2	Nitrotoluene	NMOC_g				0.00926656	0.0143564	0.00113762			0.0402972				0.0115346		0	0	0	2	1	1	0	0	1	0	0	0	1	0				0.00306397											InChI=1S/C7H7NO2/c1-6-4-2-3-5-7(6)8(9)10/h2-5H,1H3
137	C6H3NO3	unknown	NMOC_g				0.000871456	0.00102546	0.00041156			0.00193899				0.00116404		0	0	0	1	1	1	0	0	1	0	0	0	1	0															137.01116000000002_C6H3O3N
138	C9H14O	unknown	NMOC_g				0.0244008	0.0529821	0.0045977			0.0700564				0.0282545		0	0	0	1	1	1	0	0	1	0	0	0	1	0															138.10416_C9H14O
138	C9H14O	Isophorone	NMOC_g		0.0092													0	1	0	0	0	0	0	0	0	0	0	0	0	0															InChI=1S/C9H14O/c1-7-4-8(10)6-9(2,3)5-7/h4H,5-6H2,1-3H3
138	C8H10O2	2-Methoxy-4-methylphenol (= creosol)	NMOC_g	0.13585	0.0656149		0.303597	0.225864	0.0457231	0.0762506	0.0246806	0.425649				0.176848	0.00615673	2	2	0	7	2	3	1	2	1	0	0	0	6	1	0.0511238	0.0824697		0.19134	0.0138083	0.0261031		0.0153701					0.0762962		InChI=1S/C8H10O2/c1-6-3-4-7(9)8(5-6)10-2/h3-5,9H,1-2H3
138	C7H6OS	unknown	NMOC_g				0.00526231	0.00353214	0.000861301			0.00429949				0.00391542		0	0	0	1	1	1	0	0	1	0	0	0	1	0															138.01316_C7H6OS
138	C7H6O3	unknown	NMOC_g	0.0337			0.052857	0.11655	0.0110505	0.0335594	0.00740825	0.0440065				0.0573618	0.0221309	1	0	0	2	2	2	1	2	1	0	0	0	2	1				0.0118723	0.129377	0.00054016		0.0035006					0.0166029		138.03116_C7H6O3
138	C7H6O3	Hydroxybenzoic acid	NMOC_g		0.033146													0	1	0	0	0	0	0	0	0	0	0	0	0	0															InChI=1S/C7H6O3/c8-6-3-1-5(2-4-6)7(9)10/h1-4,8H,(H,9,10)
138	C10H18	unknown	NMOC_g						0.00175787			0.0375151						0	0	0	0	0	1	0	0	1	0	0	0	0	0															138.14016_C10H18
138	C10H18	1,9-Decadiene	NMOC_g		0.00657986		0.00902605	0.00769881								0.00405644		0	1	0	1	1	0	0	0	0	0	0	0	1	0															InChI=1S/C10H18/c1-3-5-7-9-10-8-6-4-2/h3-4H,1-2,5-10H2
138	C10H18	C10H18 isomers	NMOC_g		0.0382455		0.045727	0.0451973								0.00659172		0	1	0	1	1	0	0	0	0	0	0	0	1	0															1199.62_1.109
139	C9H17N	unknown	NMOC_g				0.000818721	0.00364608	0.000138158			0.00817746				0.000952399		0	0	0	1	1	1	0	0	1	0	0	0	1	0															139.13516_C9H17N
139	C10H5N	unknown	NMOC_g				0.00490175	0.00467154	0.00373931			0.0189683				0.00687843		0	0	0	1	1	1	0	0	1	0	0	0	1	0															139.04116000000002_C10H5N
139	C6H5NO3	Nitrophenol	NMOC_g	0.006			0.005									0.00833333		1	0	0	2	0	0	0	0	0	0	0	0	3	0				0.00141421									0.0051316		InChI=1S/C6H5NO3/c8-6-4-2-1-3-5(6)7(9)10/h1-4,8H
139	C7H9NO2	unknown	NMOC_g				0.00538897	0.0096849	0.000379206			0.0565678				0.00730172		0	0	0	1	1	1	0	0	1	0	0	0	1	0															139.06316_C7H9NO2
139	C8H13NO	unknown	NMOC_g				0.0011949	0.00444366	0.000138158			0.0172823				0.000846576		0	0	0	1	1	1	0	0	1	0	0	0	1	0															139.09916_C8H13NO
140	C8H12O2	unknown	NMOC_g		0.0282836		0.0286091	0.020851	0.00677581			0.0610359				0.0469923		0	1	0	2	1	2	0	0	1	0	0	0	2	0				0.00261882		0.00195171							0.0183972		140.08316000000002_C8H12O2
140	C9H16O	unknown	NMOC_g				0.0130231	0.0276874	0.00240465			0.0242795				0.00825412		0	0	0	1	1	1	0	0	1	0	0	0	1	0															140.11916000000002_C9H16O
140	C7H8O3	unknown	NMOC_g									0.156805						0	0	0	0	0	0	0	0	1	0	0	0	0	0															140.04716000000002_C7H8O3
140	C7H8O3	3-Methoxycatechol	NMOC_g	0.0491	0.031954		0.0599941	0.091962	0.0183892	0.0477137	0.0205642					0.0620446	0.0206334	1	1	0	1	1	1	1	1	0	0	0	0	1	1															InChI=1S/C7H8O3/c1-10-6-4-2-3-5(8)7(6)9/h2-4,8-9H,1H3
140	C6H4O4	unknown	NMOC_g				0.00442931	0.00091152	0.000820207			0.00261341				0.00243391		0	0	0	1	1	1	0	0	1	0	0	0	1	0															140.01016_C6H4O4
140	C5H2NS2	unknown	NMOC_g				0.00071423	0.00045576	0.000171969			0.000758733				0.00052911		0	0	0	1	1	1	0	0	1	0	0	0	1	0															139.96216_C5H3NS2
140	C10H20	unknown	NMOC_g				0.00495192	0.0226741	0.000896569			0.0155962						0	0	0	1	1	1	0	0	1	0	0	0	0	0															140.15616_C10H20
140	C10H20	1-Decene	NMOC_g	0.019	0.0312544		0.0186513	0.08905	0.00975							0.0115947		1	1	0	7	2	2	0	0	0	0	0	0	4	0				0.0126095	0.0555079	0.00388909							0.00777358		InChI=1S/C10H20/c1-3-5-7-9-10-8-6-4-2/h3H,1,4-10H2,2H3
140	C10H20	C10H20 isomers	NMOC_g		0.00328993		0.0121388	0.1232								0.000409635		0	1	0	1	1	0	0	0	0	0	0	0	1	0															1144.64_1.03
141	CH3I	unknown	NMOC_g				0.0002772	0.00022788								0.000105822		0	0	0	1	1	0	0	0	0	0	0	0	1	0															141.92716000000001_CH3I
141	CH3I	Methyl iodide	NMOC_g	0.000666667	0.00026854	0.0025	0.0011666	0.01425	0.000454		0.000149535	0.000444047			0.0017	0.000797506	0.0003	3	2	3	5	2	1	0	3	5	0	0	1	4	1	0.000305505	0.000185912	0.00364966	0.00104832	0.00247487			5.00065e-05	0.000258856				0.000847204		InChI=1S/CH3I/c1-2/h1H3
141	C6H7NO3	unknown	NMOC_g				0.00260868	0.00296244	0.000551175			0.0100321				0.00222226		0	0	0	1	1	1	0	0	1	0	0	0	1	0															141.04216000000002_C6H7NO3
141	C7H11NO2	unknown	NMOC_g				0.00170653	0.00319032	0.000207237			0.0128985				0.00158733		0	0	0	1	1	1	0	0	1	0	0	0	1	0															141.07816000000003_C7H11NO2
141	C8H15NO	unknown	NMOC_g				0.000564571	0.00068364				0.00539544				0.00052911		0	0	0	1	1	0	0	0	1	0	0	0	1	0															141.11516_C8H15NO
142	C6H6O4	unknown	NMOC_g				0.0506801	0.0141286	0.00856234			0.0357448				0.0325932		0	0	0	1	1	1	0	0	1	0	0	0	1	0															142.02616_C6H6O4
142	C9H18O	unknown	NMOC_g					0.0159516	0.00051882			0.0136572				0.00730172		0	0	0	0	1	1	0	0	1	0	0	0	1	0															142.13516_C9H18O
142	C9H18O	Nonanal	NMOC_g		0.00534614		0.00524128											0	1	0	1	0	0	0	0	0	0	0	0	0	0															InChI=1S/C9H18O/c1-2-3-4-5-6-7-8-9-10/h9H,2-8H2,1H3
142	C8H14O2	unknown	NMOC_g				0.0134547	0.0160655	0.00226649			0.0179567				0.00835994		0	0	0	1	1	1	0	0	1	0	0	0	1	0															142.09916_C8H14O2
142	C7H10O3	unknown	NMOC_g				0.053891	0.024725	0.00743285			0.0969493				0.0802131		0	0	0	1	1	1	0	0	1	0	0	0	1	0															142.06216_C7H10O3
142	C11H10	Methyl naphthalenes	NMOC_g						0.0295652			0.0439222						0	0	0	0	0	2	0	0	1	0	0	0	0	0						0.0206361									142.07816000000003_C11H10
142	C11H10	Naphthalene, 1-methyl-	NMOC_g		0.0180946		0.0290716	0.0374443								0.0114176		0	1	0	1	1	0	0	0	0	0	0	0	1	0															InChI=1S/C11H10/c1-9-5-4-7-10-6-2-3-8-11(9)10/h2-8H,1H3
142	C11H10	Naphthalene, 2-methyl-	NMOC_g		0.01878		0.0168979	0.0392274								0.0143239		0	1	0	1	1	0	0	0	0	0	0	0	1	0															InChI=1S/C11H10/c1-9-6-7-10-4-2-3-5-11(10)8-9/h2-8H,1H3
142	C10H22	unknown	NMOC_g				0.00327798	0.00546912	0.000654065			0.00590126				0.00253973		0	0	0	1	1	1	0	0	1	0	0	0	1	0															142.17116000000001_C10H22
142	C10H22	N-decane	NMOC_g	0.013	0.0124058		0.0208556	0.1051	0.0119		0.0369785	0.0300979				0.0224853	0.126	1	2	0	9	2	2	0	3	4	0	0	0	5	1		0.00707593		0.0222745	0.0434164	0.00410122		0.0408489	0.0178913				0.0346108		InChI=1S/C10H22/c1-3-5-7-9-10-8-6-4-2/h3-10H2,1-2H3
142	C10H22	Nonane, 2-methyl-	NMOC_g				0.00127168	0.0121										0	0	0	1	1	0	0	0	0	0	0	0	0	0															InChI=1S/C10H22/c1-4-5-6-7-8-9-10(2)3/h10H,4-9H2,1-3H3
142	C10H22	C10H22 isomers	NMOC_g		0.00260453		0.00867056	0.0377								0.00102026		0	1	0	1	1	0	0	0	0	0	0	0	1	0															1209.62_0.994
143	C9H5NO	unknown	NMOC_g				0.00147891	0.00376002	0.000345394			0.00488961				0.0019048		0	0	0	1	1	1	0	0	1	0	0	0	1	0															143.03616000000002_C9H5ON
143	C9H21N	unknown	NMOC_g				0.000368664	0.00079758	0.000138158			0.0021919				0.000317466		0	0	0	1	1	1	0	0	1	0	0	0	1	0															143.16716000000002_C9H21N
143	C8H17NO	unknown	NMOC_g				0.000563743	0.00239274				0.00438379				0.000423288		0	0	0	1	1	0	0	0	1	0	0	0	1	0															143.13016000000002_C8H17NO
143	C10H9N	unknown	NMOC_g				0.00286171	0.00489942	0.000583529			0.0175352				0.00116404		0	0	0	1	1	1	0	0	1	0	0	0	1	0															143.07316_C10H9N
143	C6H9NO3	unknown	NMOC_g				0.0044786	0.00831762	0.000792222			0.0452711				0.00539693		0	0	0	1	1	1	0	0	1	0	0	0	1	0															143.05816000000002_C6H9NO3
144	C9H20O	unknown	NMOC_g				0.0054317	0.00991278	0.000551175			0.00784024				0.00497364		0	0	0	1	1	1	0	0	1	0	0	0	1	0															144.15116_C9H20O
144	C6H8O4	Product of levoglucosan dehydration (pyrolysis)	NMOC_g				0.14136	0.397081	0.0227659			0.185047				0.134077		0	0	0	2	1	1	0	0	1	0	0	0	1	0				0.140941											144.04216000000002_C6H8O4
144	C8H16O2	unknown	NMOC_g				0.0276398	0.0477409	0.0025708			0.0450182				0.0158733		0	0	0	1	1	1	0	0	1	0	0	0	1	0															144.11416000000003_C8H16O2
144	C2H3Cl3	1,1,1-Trichloroethane	NMOC_g				0.0002											0	0	0	1	0	0	0	0	0	0	0	0	0	0															InChI=1S/C2H3Cl3/c1-2(3,4)5/h1H3
144	C11H12	Ethylindene	NMOC_g				0.019757	0.0715543	0.00421558			0.0334686				0.00317466		0	0	0	1	1	1	0	0	1	0	0	0	1	0															InChI=1S/C11H12/c1-2-9-7-8-10-5-3-4-6-11(9)10/h3-9H,2H2,1H3
144	C11H12	C11H12 isomers	NMOC_g		0.00973271		0.0138729	0.027								0.00540735		0	1	0	1	1	0	0	0	0	0	0	0	1	0															1869.41_1.993
144	C10H8O	unknown	NMOC_g	0.2179	0.117021					0.0369838	0.00757545						0.0139774	1	1	0	0	0	0	1	2	0	0	0	0	0	1								0.00596946							144.056991_C10H8O
144	C10H8O	2-Ethenyl benzofuran	NMOC_g				0.087025	0.170188	0.0217404			0.0282417				0.0210748		0	0	0	1	1	1	0	0	1	0	0	0	2	0													0.00661167		InChI=1S/C10H8O/c1-2-9-7-8-5-3-4-6-10(8)11-9/h2-7H,1H2
145	C10H11N	unknown	NMOC_g				0.00383599	0.00603882	0.000583529			0.0300121				0.00211644		0	0	0	1	1	1	0	0	1	0	0	0	1	0															145.08816000000002_C10H11N
145	C11H13	Unknown	NMOC_g		0.07751		0.0945196	0.191067	0.0283808							0.0278415	0.0648952	0	1	0	1	1	1	0	0	0	0	0	0	1	1															144.093377_C11H13
146	C9H6O2	unknown	NMOC_g				0.0207556	0.0194837	0.00651412			0.0192212				0.0137569		0	0	0	1	1	1	0	0	1	0	0	0	1	0															146.03616000000002_C9H6O2
146	C10H10O	Dimethylbenzofurans	NMOC_g	0.0325					0.017516	0.0207749	0.00604208	0.0885189						1	0	0	0	0	2	1	2	1	0	0	0	0	0						0.00598636		0.00408							146.07216000000003_C10H10O
146	C10H10O	Ethyl-benzofuran isomers	NMOC_g													0.0105089		0	0	0	0	0	0	0	0	0	0	0	0	1	0															1924.39_2.504
146	C10H10O	Benzofuran, -dimethyl- (isomer)s	NMOC_g				0.0133448	0.0280843								0.00541367		0	0	0	1	1	0	0	0	0	0	0	0	1	0															1944.38_2.336
146	C10H10O	Benzofuran, dimethyl- (isomer)s	NMOC_g		0.0214754		0.0206845	0.0339968								0.00955354		0	1	0	1	1	0	0	0	0	0	0	0	1	0															1974.37_2.385
146	C11H14	Unknown	NMOC_g						0.00188292			0.0327941				0.00328048		0	0	0	0	0	1	0	0	1	0	0	0	1	0															146.109027_C11H14
146	C11H14	C11H14 isomers	NMOC_g		0.00464723		0.00966714	0.0443698										0	1	0	1	1	0	0	0	0	0	0	0	0	0															1769.44_1.729
146	C5H6O5	unknown	NMOC_g				0.00264751	0.00376002	0.00051882			0.0022762				0.00275137		0	0	0	1	1	1	0	0	1	0	0	0	1	0															146.02116_C5H6O5
146	C6H10O4	unknown	NMOC_g				0.0146494	0.0159516	0.00525988			0.0263871				0.0210586		0	0	0	1	1	1	0	0	1	0	0	0	1	0															146.05716_C6H10O4
147	C5H9NO4	Isoprene hydroxynitrates	NMOC_g				0.017											0	0	0	1	0	0	0	0	0	0	0	0	0	0															147.10816999999997_C5O4H9N
147	C8H21NO	unknown	NMOC_g				0.000543767	0.0011394	0.000137187			0.00269772				0.00052911		0	0	0	1	1	1	0	0	1	0	0	0	1	0															147.16216_C8H21NO
147	C8H5NO2	unknown	NMOC_g				0.00249579	0.0079758	0.000448285			0.0106223				0.00222226		0	0	0	1	1	1	0	0	1	0	0	0	1	0															147.03116_C8H5NO2
147	C9H9NO	unknown	NMOC_g				0.00404426	0.00672246	0.000652608			0.0295906				0.0028572		0	0	0	1	1	1	0	0	1	0	0	0	1	0															147.06816_C9H9NO
147	CFCl3	Trichlorofluoromethane	NMOC_g													0.0001		0	0	0	0	0	0	0	0	0	0	0	0	1	0															InChI=1S/CCl3F/c2-1(3,4)5
148	C10H12O	Methyl chavicol (estragole)	NMOC_g		0.0023		0.0254986	0.0385117	0.00535465			0.044428				0.0297311		0	1	0	3	1	1	0	0	1	0	0	0	1	0				0.010622											InChI=1S/C10H12O/c1-3-4-9-5-7-10(11-2)8-6-9/h3,5-8H,1,4H2,2H3
148	C11H16	C11 aromatics	NMOC_g						0.0318656			0.027483					0.0570665	0	0	0	0	0	3	0	0	1	0	0	0	0	2						0.02698								0.0503476	148.12416000000002_C11H16
148	C11H16	Benzene, pentyl-	NMOC_g		0.0366876		0.0317268	0.0284518								0.0145975		0	1	0	1	1	0	0	0	0	0	0	0	1	0															InChI=1S/C11H16/c1-2-3-5-8-11-9-6-4-7-10-11/h4,6-7,9-10H,2-3,5,8H2,1H3
148	C11H16	Ethyl benzoate	NMOC_g		0.00675117													0	1	0	0	0	0	0	0	0	0	0	0	0	0															InChI=1S/C9H10O2/c1-2-11-9(10)8-6-4-3-5-7-8/h3-7H,2H2,1H3
148	C11H16	C11H16 isomers	NMOC_g				0.00457323											0	0	0	1	0	0	0	0	0	0	0	0	0	0															1629.48_1.465
148	C11H16	C11H16 isomers	NMOC_g		0.042637		0.0571653	0.0789136								0.00486583		0	1	0	1	1	0	0	0	0	0	0	0	1	0															1664.47_1.456
148	C9H8O2	unknown	NMOC_g	0.0373			0.0587034	0.0736177	0.0198821			0.0906265				0.0493586	0.00615673	1	0	0	2	2	2	0	0	1	0	0	0	2	1				0.00923741	0.0274107	0.00846559							0.0113093		148.051906_C9H8O2
148	C9H8O2	Cinnamic acid	NMOC_g		0.0270666													0	1	0	0	0	0	0	0	0	0	0	0	0	0															InChI=1S/C9H8O2/c10-9(11)7-6-8-4-2-1-3-5-8/h1-7H,(H,10,11)/b7-6+
148	C8H4O3	unknown	NMOC_g				0.0079009	0.0259783	0.00286168			0.00961062				0.0112171		0	0	0	1	1	1	0	0	1	0	0	0	1	0															148.01516_C8H4O3
149	C4H7NO5	Methyl vinyl ketone/methacrolein hydroxynitrates	NMOC_g				0.021											0	0	0	1	0	0	0	0	0	0	0	0	0	0															149.07640999999998_C4H7NO5
149	C10H15N	unknown	NMOC_g				0.00112228	0.0017091	0.000137187			0.0106223				0.000634932		0	0	0	1	1	1	0	0	1	0	0	0	1	0															149.12016_C10H15N
149	C9H11NO	unknown	NMOC_g				0.00175872	0.0028485	0.000274859			0.0171137				0.00116404		0	0	0	1	1	1	0	0	1	0	0	0	1	0															149.08316000000002_C9H11NO
149	C8H7NO2	unknown	NMOC_g				0.00533603	0.00603882	0.000654065			0.0191369				0.00560857		0	0	0	1	1	1	0	0	1	0	0	0	1	0															149.04716000000002_C8H7NO2
149	C5H11NO4	unknown	NMOC_g				0.00753103	0.0039879	0.000792222			0.0209073				0.00835994		0	0	0	1	1	1	0	0	1	0	0	0	1	0															149.06816_C5H11NO4
150	C9H10O2	Carvone	NMOC_g		0.0021													0	1	0	0	0	0	0	0	0	0	0	0	0	0															InChI=1S/C10H14O/c1-7(2)9-5-4-8(3)10(11)6-9/h4,9H,1,5-6H2,2-3H3
150	C9H10O2	Vinyl guaiacol	NMOC_g	0.1222	0.187406		0.146576	0.137304	0.0204373	0.0625529	0.0156899	0.507761				0.258128	0.0084863	1	1	0	3	2	2	1	2	1	0	0	0	2	1				0.0976351	0.0488324	0.00443636		0.0129802					0.127916		InChI=1S/C9H10O2/c1-3-7-4-5-8(10)9(6-7)11-2/h3-6,10H,1H2,2H3
150	C10H14O	camphor/isomers	NMOC_g		0.011		0.0269609	0.0327008	0.0030867			0.0276516				0.0043387		0	1	0	1	1	1	0	0	1	0	0	0	1	0															152.237_C10H14O
150	C8H6O3	unknown	NMOC_g				0.0144887	0.00820368	0.0041258			0.00986353				0.00751337		0	0	0	1	1	1	0	0	1	0	0	0	1	0															150.03116_C8H6O3
150	C4H6O6	unknown	NMOC_g				0.00417579	0.00296244	0.000517363			0.00649138				0.00518528		0	0	0	1	1	1	0	0	1	0	0	0	1	0															150.01616_C4H6O6
150	C11H18	unknown	NMOC_g					0.0371444	0.0144307			0.0750303				0.0201223	0.0221309	0	0	0	0	1	2	0	0	1	0	0	0	2	1						0.0173401							0.0219765		150.14016_C11H18
150	C11H18	C11H18 isomers	NMOC_g		0.0489471		0.0135027											0	1	0	1	0	0	0	0	0	0	0	0	0	0															1794.43_1.342
151	C8H9NO2	unknown	NMOC_g				0.00310053	0.0034182	0.000413017			0.0348174				0.00158733		0	0	0	1	1	1	0	0	1	0	0	0	1	0															151.06316_C8H9NO2
151	C7H5NO3	unknown	NMOC_g				0.0018071	0.0011394	0.000276316			0.00143316				0.00179898		0	0	0	1	1	1	0	0	1	0	0	0	1	0															151.02616_C7H5NO3
152	C10H16O	Camphor + other oxygenated monoterpenes	NMOC_g				0.0417873	0.032359	0.00244866			0.0301807				0.0091007		0	0	0	2	1	1	0	0	1	0	0	0	1	0				0.0243065											152.11916000000002_C10H16O
152	C11H20	unknown	NMOC_g						0.00179896			0.0245324						0	0	0	0	0	1	0	0	1	0	0	0	0	0															152.15616_C11H20
152	C11H20	1,10-Undecadiene	NMOC_g		0.00438658		0.00630356	0.0112383								0.0071354		0	1	0	1	1	0	0	0	0	0	0	0	1	0															InChI=1S/C11H20/c1-3-5-7-9-11-10-8-6-4-2/h3-4H,1-2,5-11H2
152	C11H20	C11H20 isomers	NMOC_g		0.00904731		0.00803196	0.0102166										0	1	0	1	1	0	0	0	0	0	0	0	0	0															1624.49_1.17
152	C12H8	Acenaphthylene	NMOC_g		0.0150789		0.00960125	0.00273456	0.0114633			0.00278202				0.00199519		0	1	0	2	1	1	0	0	1	0	0	0	2	0				0.00156144									0.00237266		InChI=1S/C12H8/c1-3-9-4-2-6-11-8-7-10(5-1)12(9)11/h1-8H
152	C8H8O3	Vanillin	NMOC_g				0.134059	0.0756853	0.0355401			0.234533				0.173337		0	0	0	2	2	1	0	0	1	0	0	0	1	0				0.1589	0.106469										InChI=1S/C8H8O3/c1-11-8-4-6(5-9)2-3-7(8)10/h2-5,10H,1H3
152	C9H12O2	unknown	NMOC_g				0.137069	0.0750865	0.0163668			0.260498				0.124764		0	0	0	1	1	1	0	0	1	0	0	0	1	0															152.08316000000002_C9H12O2
153	C8H11NO2	unknown	NMOC_g				0.00318658	0.00603882	0.000138158			0.0364192				0.00370377		0	0	0	1	1	1	0	0	1	0	0	0	1	0															153.07816000000003_C8H11NO2
153	C11H21	unknown	NMOC_g				0.000738952	0.00182304	0.000138158			0.00657569				0.000740754		0	0	0	1	1	1	0	0	1	0	0	0	1	0															153.16416_C11H21
153	C11H7N	unknown	NMOC_g				0.00444953	0.00319032	0.00434469			0.00944201				0.00222226		0	0	0	1	1	1	0	0	1	0	0	0	1	0															153.05716_C11H7N
153	C7H7NO3	Nitrocresol	NMOC_g	0.009			0.00533333		0.015							0.0095		1	0	0	3	0	1	0	0	0	0	0	0	4	0				0.0011547									0.0043589		InChI=1S/C7H7NO3/c1-5-6(8(10)11)3-2-4-7(5)9/h2-4,9H,1H3
154	C10H18O	Cineole + other oxygenated monoterpenes	NMOC_g		0.0018		0.00602393	0.0207371	0.00172697			0.0171137				0.00783083		0	1	0	2	1	1	0	0	1	0	0	0	1	0				0.00470075											154.13516_C10H18O
154	C9H14O2	unknown	NMOC_g				0.00976772	0.00922914	0.000137187			0.0183782				0.0114288		0	0	0	1	1	1	0	0	1	0	0	0	1	0															154.09916_C9H15O2
154	C9H14O2	2-Norbornaneacetic acid	NMOC_g		0.0022													0	1	0	0	0	0	0	0	0	0	0	0	0	0															InChI=1S/C9H14O2/c10-9(11)5-8-4-6-1-2-7(8)3-6/h6-8H,1-5H2,(H,10,11)
154	C11H22	unknown	NMOC_g				0.00640145	0.022788	0.0028882			0.0179567						0	0	0	1	1	1	0	0	1	0	0	0	0	0															154.17116000000001_C11H22
154	C11H22	1-Undecene	NMOC_g		0.0179575		0.0239591	0.0944	0.0136							0.00542628		0	1	0	4	1	1	0	0	0	0	0	0	1	0				0.0085747											InChI=1S/C11H22/c1-3-5-7-9-11-10-8-6-4-2/h3H,1,4-11H2,2H3
154	C11H22	C11H22 isomers	NMOC_g		0.00246745		0.0122544	0.0516								0.00197319		0	1	0	1	1	0	0	0	0	0	0	0	1	0															1429.55_1.047
154	C12H10	unknown	NMOC_g						0.00536048			0.00590126						0	0	0	0	0	1	0	0	1	0	0	0	0	0															154.07816000000003_C12H10
154	C12H10	Biphenyl	NMOC_g		0.00877315		0.00964	0.0167597								0.0017024		0	1	0	1	1	0	0	0	0	0	0	0	1	0															InChI=1S/C12H10/c1-3-7-11(8-4-1)12-9-5-2-6-10-12/h1-10H
154	C12H10	Acenaphthene	NMOC_g		0.0029													0	1	0	0	0	0	0	0	0	0	0	0	0	0															InChI=1S/C12H10/c1-3-9-4-2-6-11-8-7-10(5-1)12(9)11/h1-6H,7-8H2
154	C7H6O4	unknown	NMOC_g				0.0105088	0.0028485	0.00158881			0.00429949				0.00391542		0	0	0	1	1	1	0	0	1	0	0	0	1	0															154.02616_C7H6O4
154	C8H10O3	Syringol	NMOC_g	0.03645	0.0440447		0.0753857	0.095345	0.0424596	0.176472	0.0425303	0.144497				0.120819		2	1	0	7	2	3	1	2	1	0	0	0	5	0	0.0333047			0.0658659	0.0613604	0.0261606		0.0336372					0.0396264		InChI=1S/C8H10O3/c1-10-6-4-3-5-7(11-2)8(6)9/h3-5,9H,1-2H3
155	C6H5NO4	4-Nitrocatechol	NMOC_g	0.043			0.076		0.085							0.031		1	0	0	3	0	1	0	0	0	0	0	0	3	0				0.0449778									0.0217945		InChI=1S/C6H5NO4/c8-5-2-1-4(7(10)11)3-6(5)9/h1-3,8-9H
155	C6H5NO4	Nitrocatechol	NMOC_g	0.012			0.00833333		0.014							0.0145		1	0	0	3	0	1	0	0	0	0	0	0	4	0				0.00404145									0.00443471		InChI=1S/C6H5NO4/c8-5-3-1-2-4(6(5)9)7(10)11/h1-3,8-9H
155	C7H9NO3	unknown	NMOC_g				0.00193745	0.00307638	0.000345394			0.0146688				0.00222226		0	0	0	1	1	1	0	0	1	0	0	0	1	0															155.05816000000002_C7H9NO3
156	C11H24	unknown	NMOC_g				0.00277573	0.00831762	0.000446828			0.00556404						0	0	0	1	1	1	0	0	1	0	0	0	0	0															156.18716_C11H24
156	C11H24	N-undecane	NMOC_g	0.028	0.0063057		0.0218399	0.1055	0.01145							0.00320481		1	1	0	6	1	2	0	0	0	0	0	0	3	0				0.0140855		0.0105359							0.00250588		InChI=1S/C11H24/c1-3-5-7-9-11-10-8-6-4-2/h3-11H2,1-2H3
156	C11H24	C11H24 isomers	NMOC_g					0.0615										0	0	0	0	1	0	0	0	0	0	0	0	0	0															1449.54_0.999
156	C10H20O	Decanal	NMOC_g				0.00370238	0.0121916	0.000449741			0.00581696				0.00243391		0	0	0	2	1	1	0	0	1	0	0	0	1	0				3.36657e-06											InChI=1S/C10H20O/c1-2-3-4-5-6-7-8-9-10-11/h10H,2-9H2,1H3
156	C9H16O2	unknown	NMOC_g				0.00802041	0.0119637	0.001511			0.0124769				0.00359795		0	0	0	1	1	1	0	0	1	0	0	0	1	0															156.11416000000003_C9H16O2
156	C8H12O3	unknown	NMOC_g				0.0179766	0.0119637	0.00241048			0.0273987				0.0241274		0	0	0	1	1	1	0	0	1	0	0	0	1	0															156.07816000000003_C8H12O3
156	C7H8O4	unknown	NMOC_g				0.0169027	0.0074061	0.00367751			0.0301807				0.0183072		0	0	0	1	1	1	0	0	1	0	0	0	1	0															156.04216000000002_C7H8O4
156	C12H12	Naphthalene, 1-ethyl-	NMOC_g		0.00767651											0.00153038		0	1	0	0	0	0	0	0	0	0	0	0	1	0															InChI=1S/C12H12/c1-2-10-7-5-8-11-6-3-4-9-12(10)11/h3-9H,2H2,1H3
156	C12H12	Naphthalene, 1,6-dimethyl-	NMOC_g													0.00153038		0	0	0	0	0	0	0	0	0	0	0	0	1	0															InChI=1S/C12H12/c1-9-6-7-12-10(2)4-3-5-11(12)8-9/h3-8H,1-2H3
156	C12H12	1,3-Dimethylnaphthalene	NMOC_g		0.00767651		0.0233654	0.0805979	0.00770365			0.0443437				0.00445947		0	1	0	3	2	1	0	0	1	0	0	0	2	0				0.0137789	0.0477974								0.00342093		InChI=1S/C12H12/c1-9-7-10(2)12-6-4-3-5-11(12)8-9/h3-8H,1-2H3
156	C11H8O	unknown	NMOC_g				0.00875722	0.00307638	0.00483115			0.00590126				0.00391542		0	0	0	1	1	1	0	0	1	0	0	0	1	0															156.05716_C11H8O
157	C11H11N	unknown	NMOC_g				0.00151712	0.00273456	0.000241048			0.0127299				0.00105822		0	0	0	1	1	1	0	0	1	0	0	0	1	0															157.08816000000002_C11H11N
158	C6H6O5	unknown	NMOC_g				0.00355777	0.00136728	0.000586442			0.00252911				0.00296302		0	0	0	1	1	1	0	0	1	0	0	0	1	0															158.02116_C6H6O5
158	C10H22O	unknown	NMOC_g				0.00117061	0.00159516	0.000207237			0.00278202				0.00179898		0	0	0	1	1	1	0	0	1	0	0	0	1	0															158.16616000000002_C10H22O
158	C10H6O2	unknown	NMOC_g				0.00460589	0.00182304	0.00314964			0.00404658				0.00328048		0	0	0	1	1	1	0	0	1	0	0	0	1	0															158.03616000000002_C10H6O2
158	C11H10O	unknown	NMOC_g				0.0203238	0.0218765	0.00541645			0.0411402				0.014286		0	0	0	1	1	1	0	0	1	0	0	0	1	0															158.07216000000003_C11H10O
158	C12H14	unknown	NMOC_g				0.0182162	0.0633506	0.00280602			0.0385268				0.00571439		0	0	0	1	1	1	0	0	1	0	0	0	1	0															158.10916_C12H14
158	C5H2O4S	unknown	NMOC_g				0.000266316	0.00022788				0.000337215				0.000105822		0	0	0	1	1	0	0	0	1	0	0	0	1	0															157.96716_C5H2O4S
158	C7H10O4	unknown	NMOC_g				0.0123106	0.0112801	0.00299109			0.0217504				0.0188363		0	0	0	1	1	1	0	0	1	0	0	0	1	0															158.05716_C7H10O4
158	C9H18O2	unknown	NMOC_g				0.00629918	0.0118498	0.00093038			0.0146688				0.00306884		0	0	0	1	1	1	0	0	1	0	0	0	1	0															158.13016000000002_C9H18O2
159	C10H9NO	unknown	NMOC_g				0.00112954	0.00182304	0.00020578			0.00876758				0.000952399		0	0	0	1	1	1	0	0	1	0	0	0	1	0															159.06816_C10H9ON
159	C11H13N	unknown	NMOC_g				0.00126061	0.00250668	0.000171969			0.0135729				0.000740754		0	0	0	1	1	1	0	0	1	0	0	0	1	0															159.10416_C11H13N
160	C11H12O	C11 aromatics/pentamethylbenzene	NMOC_g		0.0041		0.0300151	0.0511591	0.00599707			0.0692976						0	1	0	1	1	1	0	0	1	0	0	0	0	0															148.249_C11H12O
160	C11H12O	3,3-Dimethyl-1-indanone	NMOC_g													0.0142537		0	0	0	0	0	0	0	0	0	0	0	0	1	0															InChI=1S/C11H12O/c1-11(2)7-10(12)8-5-3-4-6-9(8)11/h3-6H,7H2,1-2H3
160	C10H8O2	unknown	NMOC_g				0.0200517	0.0234716	0.00608217			0.0289162				0.0187305		0	0	0	1	1	1	0	0	1	0	0	0	1	0															160.05216000000001_C10H8O2
161	C9H23NO	unknown	NMOC_g				0.000399717	0.00091152				0.0022762				0.000423288		0	0	0	1	1	0	0	0	1	0	0	0	1	0															161.17716000000001_C9H23NO
161	C9H7NO2	unknown	NMOC_g				0.0025543	0.00934308	0.000413017			0.0146688				0.00232809		0	0	0	1	1	1	0	0	1	0	0	0	1	0															161.04716000000002_C9H7NO2
161	C10H11NO	unknown	NMOC_g				0.00190857	0.00262062	0.000274859			0.0191369				0.00137569		0	0	0	1	1	1	0	0	1	0	0	0	1	0															161.08316000000002_C10H11NO
162	C10H10O2	unknown	NMOC_g				0.0577598	0.0534379	0.0110151			0.103862				0.0455035		0	0	0	1	1	1	0	0	1	0	0	0	1	0															162.06716_C10H10O2
162	C11H14O	unknown	NMOC_g				0.00919072	0.0160655	0.00140519			0.0238579				0.00931234		0	0	0	1	1	1	0	0	1	0	0	0	1	0															162.10416_C11H14O
162	C12H18	C12 aromatics	NMOC_g						0.00109798			0.0156805						0	0	0	0	0	1	0	0	1	0	0	0	0	0															162.14016_C12H18
162	C12H18	Benzene, (1,3-dimethylbutyl)-	NMOC_g				0.00334401	0.0123474										0	0	0	1	1	0	0	0	0	0	0	0	0	0															InChI=1S/C12H18/c1-10(2)9-11(3)12-7-5-4-6-8-12/h4-8,10-11H,9H2,1-3H3
162	C12H18	Benzene, hexyl-	NMOC_g		0.00370117		0.00415119	0.0214097								0.0013643		0	1	0	1	1	0	0	0	0	0	0	0	1	0															InChI=1S/C12H18/c1-2-3-4-6-9-12-10-7-5-8-11-12/h5,7-8,10-11H,2-4,6,9H2,1H3
162	C9H22O2	unknown	NMOC_g				0.00409904	0.00615276	0.000551175			0.00935771				0.00412706		0	0	0	1	1	1	0	0	1	0	0	0	1	0															162.16116000000002_C9H22O2
162	C9H6O3	unknown	NMOC_g				0.0114652	0.0254086	0.00370696			0.0163549				0.0143918		0	0	0	1	1	1	0	0	1	0	0	0	1	0															162.03116_C9H6O3
163	C5H9NO5	Nitroxyhydroperoxide/nitroxyhydroxyepoxide	NMOC_g				0.019											0	0	0	1	0	0	0	0	0	0	0	0	0	0															163.10306999999997_C5H9NO5
163	C6H13NO4	unknown	NMOC_g				0.0026809	0.00205092	0.000379206			0.00665999				0.00137569		0	0	0	1	1	1	0	0	1	0	0	0	1	0															163.08416000000003_C6H13NO4
163	C9H9NO2	unknown	NMOC_g				0.00270899	0.00250668	0.000413017			0.0112967				0.00179898		0	0	0	1	1	1	0	0	1	0	0	0	1	0															163.06316_C9H9O2N
164	CCl4	Carbon tetrachloride	NMOC_g													0.0008		0	0	0	0	0	0	0	0	0	0	0	0	4	0													0.000316228		InChI=1S/CCl4/c2-1(3,4)5
164	C10H12O2	Eugenol + isoeugenol	NMOC_g				0.0874493	0.0631228	0.0185418	0.0837843	0.0150673	0.161104				0.0541765		0	0	0	2	1	1	1	2	1	0	0	0	2	0				0.0953877				0.0107045					0.00777591		164.08316000000002_C10H12O2
164	C12H20	unknown	NMOC_g				0.00945806	0.0181165	0.00106708			0.0223405				0.00613768		0	0	0	1	1	1	0	0	1	0	0	0	1	0															164.15616_C12H20
164	C9H8O3	unknown	NMOC_g				0.0194501	0.0096849	0.00665987			0.0314453				0.031535		0	0	0	1	1	1	0	0	1	0	0	0	1	0															164.04716000000002_C9H8O3
165	C12H21	unknown	NMOC_g				0.00151722	0.00364608	0.000171969			0.00725012				0.000952399		0	0	0	1	1	1	0	0	1	0	0	0	1	0															165.16416_C12H21
165	C10H15NO	unknown	NMOC_g				0.000780226	0.0017091	0.000137187			0.0091048				0.000634932		0	0	0	1	1	1	0	0	1	0	0	0	1	0															165.11516_C10H15NO
166	C10H14O2	unknown	NMOC_g				0.0383834	0.0206231	0.00494309			0.0733442				0.0287836		0	0	0	1	1	1	0	0	1	0	0	0	1	0															166.09916_C10H14O2
166	C11H18O	unknown	NMOC_g				0.00761605	0.0183443	0.000996546			0.0217504				0.00550275		0	0	0	1	1	1	0	0	1	0	0	0	1	0															166.13516_C11H18O
166	C12H22	unknown	NMOC_g						0.000792222			0.00817746				0.00476199		0	0	0	0	0	1	0	0	1	0	0	0	1	0															166.17116000000001_C12H22
166	C12H22	1,11-Dodecadiene	NMOC_g		0.0116518		0.00887672	0.0123482										0	1	0	1	1	0	0	0	0	0	0	0	0	0															InChI=1S/C12H22/c1-3-5-7-9-11-12-10-8-6-4-2/h3-4H,1-2,5-12H2
166	C4H6O7	unknown	NMOC_g				0.00175144	0.00148122	0.000310127			0.00193899				0.00148151		0	0	0	1	1	1	0	0	1	0	0	0	1	0															166.01116000000002_C4H7O7
166	C9H10O3	unknown	NMOC_g				0.0783705	0.0659713	0.0110016			0.0912166				0.0562973		0	0	0	1	1	1	0	0	1	0	0	0	1	0															166.06216_C9H10O3
167	C9H13NO2	unknown	NMOC_g				0.00338824	0.00546912	0.000241048			0.0239423				0.00402124		0	0	0	1	1	1	0	0	1	0	0	0	1	0															167.09416000000002_C9H13NO2
168	C9H12O3	unknown	NMOC_g				0.0293463	0.0231298	0.0285915			0.103019				0.0372494		0	0	0	1	1	1	0	0	1	0	0	0	1	0															168.07816000000003_C9H12O3
168	C8H8O4	unknown	NMOC_g				0.0257111	0.0298523	0.00430505			0.01998				0.0144976		0	0	0	1	1	1	0	0	1	0	0	0	1	0															168.04216000000002_C8H8O4
168	C12H24	unknown	NMOC_g				0.00438762	0.018914	0.00165061			0.0140787						0	0	0	1	1	1	0	0	1	0	0	0	0	0															168.18716_C12H24
168	C12H24	1-Dodecene	NMOC_g		0.0172721		0.0157226	0.0981								0.00415126		0	1	0	1	1	0	0	0	0	0	0	0	1	0															InChI=1S/C12H24/c1-3-5-7-9-11-12-10-8-6-4-2/h3H,1,4-12H2,2H3
168	C12H24	C12H24 isomers	NMOC_g				0.00381504	0.0835										0	0	0	1	1	0	0	0	0	0	0	0	0	0															1844.42_1.087
168	C12H8O	unknown	NMOC_g				0.0122994	0.0102546	0.00640801			0.0090205				0.00634932		0	0	0	1	1	1	0	0	1	0	0	0	1	0															168.05716_C12H9O
168	C11H20O	unknown	NMOC_g				0.00652351	0.015154	0.000933293			0.0130671				0.00412706		0	0	0	1	1	1	0	0	1	0	0	0	1	0															168.15116_C11H20O
168	C10H16S	unknown	NMOC_g				0.0119325	0.0175468	0.00277366			0.0171137				0.0043387		0	0	0	1	1	1	0	0	1	0	0	0	1	0															168.09716_C10H16S
168	C10H16O2	unknown	NMOC_g				0.0116063	0.00774792	0.000276316			0.010538				0.00444453		0	0	0	1	1	1	0	0	1	0	0	0	1	0															168.11416000000003_C10H16O2
169	C10H19NO	unknown	NMOC_g				0.000480405	0.00079758	0.000138158			0.00379367				0.000317466		0	0	0	1	1	1	0	0	1	0	0	0	1	0															169.14616_C10H19NO
169	C7H7NO4	Nitromethylcatechol	NMOC_g	0.007			0.00466667		0.008							0.008		1	0	0	3	0	1	0	0	0	0	0	0	3	0				0.00057735									0.002		InChI=1S/C7H7NO4/c1-4-2-6(9)7(10)3-5(4)8(11)12/h2-3,9-10H,1H3
169	C8H11NO3	unknown	NMOC_g				0.00124952	0.00182304	0.000241048			0.017198				0.00126986		0	0	0	1	1	1	0	0	1	0	0	0	1	0															169.07316_C8H11NO3
170	C7H6O5	unknown	NMOC_g				0.00246241	0.00148122	0.000620254			0.00193899				0.0019048		0	0	0	1	1	1	0	0	1	0	0	0	1	0															170.02116_C7H6O5
170	C10H18O2	unknown	NMOC_g				0.00609827	0.00763398	0.00099509			0.0091048				0.00148151		0	0	0	1	1	1	0	0	1	0	0	0	1	0															170.13016000000002_C10H18O2
170	C11H22O	unknown	NMOC_g				0.00345559	0.0105964	0.000345394			0.00733442				0.00253973		0	0	0	1	1	1	0	0	1	0	0	0	1	0															170.16616000000002_C11H22O
170	C12H10O	unknown	NMOC_g				0.00745656	0.00467154	0.0021945			0.00994784				0.00317466		0	0	0	1	1	1	0	0	1	0	0	0	1	0															170.07216000000003_C12H11O
170	C12H26	unknown	NMOC_g					0.0074061	0.00030867			0.00488961				0.00105822		0	0	0	0	1	1	0	0	1	0	0	0	1	0															170.20316000000003_C12H26
170	C12H26	Dodecane	NMOC_g				0.00381619	0.0878										0	0	0	1	1	0	0	0	0	0	0	0	0	0															InChI=1S/C12H26/c1-3-5-7-9-11-12-10-8-6-4-2/h3-12H2,1-2H3
170	C12H26	C12H26 isomers	NMOC_g					0.011										0	0	0	0	1	0	0	0	0	0	0	0	0	0															1789.43_1.021
170	C13H14	unknown	NMOC_g				0.0239543	0.0766816	0.00376001			0.0410559				0.00560857		0	0	0	1	1	1	0	0	1	0	0	0	1	0															170.10916_C13H14
170	C8H10O4	unknown	NMOC_g				0.0096584	0.00695034	0.0021738			0.0150061				0.0108997		0	0	0	1	1	1	0	0	1	0	0	0	1	0															170.05716_C8H10O4
171	C7H9NO4	unknown	NMOC_g				0.00136428	0.0028485	0.000345394			0.00531113				0.00105822		0	0	0	1	1	1	0	0	1	0	0	0	1	0															171.05216000000001_C7H9NO4
171	C8H13NO3	unknown	NMOC_g				0.00205928	0.00353214	0.000515907			0.0140787				0.00158733		0	0	0	1	1	1	0	0	1	0	0	0	1	0															171.08916000000002_C8H13NO3
172	C11H8O2	unknown	NMOC_g				0.00704188	0.0039879	0.00240757			0.00784024				0.00582021		0	0	0	1	1	1	0	0	1	0	0	0	1	0															172.05216000000001_C11H8O2
172	C12H12O	unknown	NMOC_g				0.0118982	0.0165213	0.00315141			0.0245324				0.00920652		0	0	0	1	1	1	0	0	1	0	0	0	1	0															172.08816000000002_C12H12O
172	C13H16	unknown	NMOC_g				0.0114857	0.0430693	0.00136701			0.0267243				0.00148151		0	0	0	1	1	1	0	0	1	0	0	0	1	0															172.12416000000002_C13H16
172	C7H8O5	unknown	NMOC_g				0.0135085	0.00319032	0.00113907			0.0217504				0.00391542		0	0	0	1	1	1	0	0	1	0	0	0	1	0															172.03616000000002_C7H8O5
172	C8H12O4	unknown	NMOC_g				0.0108192	0.0135589	0.0114045			0.0273987				0.0205295		0	0	0	1	1	1	0	0	1	0	0	0	1	0															172.07316_C8H12O4
172	C10H20O2	unknown	NMOC_g				0.00562128	0.0103685	0.000896569			0.0130671				0.00412706		0	0	0	1	1	1	0	0	1	0	0	0	1	0															172.14616_C10H20O2
172	CH2Br2	Dibromomethane	NMOC_g	0.001			0.00060975	0.0001	0.00057							0.00166667		1	0	0	4	1	1	0	0	0	0	0	0	3	0				0.000444762									0.00057735		InChI=1S/CH2Br2/c2-1-3/h1H2
173	C11H11NO	unknown	NMOC_g				0.000872343	0.0017091	0.000138158			0.00758733				0.000634932		0	0	0	1	1	1	0	0	1	0	0	0	1	0															173.08316000000002_C11H11NO
174	C10H22O2	unknown	NMOC_g				0.00293357	0.00558306	0.000413017			0.00758733				0.00349213		0	0	0	1	1	1	0	0	1	0	0	0	1	0															174.16116000000002_C10H22O2
174	C11H10O2	unknown	NMOC_g				0.0166074	0.017091	0.00404652			0.0301807				0.0157675		0	0	0	1	1	1	0	0	1	0	0	0	1	0															174.06716_C11H10O2
174	C12H14O	unknown	NMOC_g				0.0114334	0.0241553	0.00188583			0.0295906				0.00931234		0	0	0	1	1	1	0	0	1	0	0	0	1	0															174.10416_C12H14O
174	C7H10O5	unknown	NMOC_g				0.0166376	0.00808974	0.00567966			0.0392012				0.0215877		0	0	0	1	1	1	0	0	1	0	0	0	1	0															174.05216000000001_C7H10O5
174	CHBrCl2	Bromodichloromethane	NMOC_g													0.0007		0	0	0	0	0	0	0	0	0	0	0	0	1	0															InChI=1S/CHBrCl2/c2-1(3)4/h1H
175	C10H25NO	unknown	NMOC_g				0.000246598	0.0005697				0.00151747				0.000211644		0	0	0	1	1	0	0	0	1	0	0	0	1	0															175.19316_C10H25NO
175	C10H9NO2	unknown	NMOC_g				0.0016701	0.00672246	0.000274859			0.0120554				0.00126986		0	0	0	1	1	1	0	0	1	0	0	0	1	0															175.06316_C10H9O2N
175	C11H13NO	unknown	NMOC_g				0.000789648	0.00102546	0.000137187			0.0091048				0.000634932		0	0	0	1	1	1	0	0	1	0	0	0	1	0															175.09916_C11H13NO
176	C10H8O3	unknown	NMOC_g				0.0107643	0.0174328	0.00308962			0.0185468				0.0107939		0	0	0	1	1	1	0	0	1	0	0	0	1	0															176.04716000000002_C10H8O3
176	C10H24O2	unknown	NMOC_g				0.00257924	0.00478548	0.000379206			0.0067443				0.00275137		0	0	0	1	1	1	0	0	1	0	0	0	1	0															176.17716000000001_C10H24O2
176	C11H12O2	unknown	NMOC_g				0.0197741	0.020965	0.00369967			0.0450182				0.019048		0	0	0	1	1	1	0	0	1	0	0	0	1	0															176.08316000000002_C11H13O2
176	C12H16O	unknown	NMOC_g				0.00458495	0.00922914	0.000583529			0.0107066				0.0028572		0	0	0	1	1	1	0	0	1	0	0	0	1	0															176.11916000000002_C12H16O
176	C13H20	C13 aromatics	NMOC_g				0.00778245		0.00109798			0.0121397				0.00148151		0	0	0	2	0	1	0	0	1	0	0	0	1	0				0.00101477											176.15616_C13H20
176	C13H20	Benzene, heptyl-	NMOC_g					0.0207725										0	0	0	0	1	0	0	0	0	0	0	0	0	0															InChI=1S/C13H20/c1-2-3-4-5-7-10-13-11-8-6-9-12-13/h6,8-9,11-12H,2-5,7,10H2,1H3
178	C10H10O3	unknown	NMOC_g				0.034309	0.0223322	0.00601891			0.0589283				0.0229634		0	0	0	1	1	1	0	0	1	0	0	0	1	0															178.06216_C10H10O3
178	C11H14O2	unknown	NMOC_g				0.0109616	0.0085455	0.00178003			0.0272301				0.0115346		0	0	0	1	1	1	0	0	1	0	0	0	1	0															178.09916_C11H14O2
178	C12H18O	unknown	NMOC_g				0.0034994	0.00763398	0.000239591			0.00868328				0.00179898		0	0	0	1	1	1	0	0	1	0	0	0	1	0															178.13516_C12H18O
178	C13H22	unknown	NMOC_g				0.00373769	0.0118498	0.000758411			0.00986353				0.00201062		0	0	0	1	1	1	0	0	1	0	0	0	1	0															178.17116000000001_C13H22
179	C12H21N	unknown	NMOC_g				0.000983379	0.00330426	0.000138158			0.00421518				0.00052911		0	0	0	1	1	1	0	0	1	0	0	0	1	0															179.16716000000002_C12H21N
179	C9H9NO3	unknown	NMOC_g				0.00186697	0.00273456	0.000928924			0.00800885				0.00137569		0	0	0	1	1	1	0	0	1	0	0	0	1	0															179.05816000000002_C9H10NO3
180	C9H8O4	unknown	NMOC_g				0.00560021		0.00304384			0.0108752				0.00560857		0	0	0	1	0	1	0	0	1	0	0	0	1	0															180.04216000000002_C9H8O4
180	C13H24	unknown	NMOC_g						0.00154918			0.0109595				0.00296302		0	0	0	0	0	1	0	0	1	0	0	0	1	0															180.18716_C13H24
180	C13H24	1,12-Tridecadiene	NMOC_g		0.00397533		0.00447229	0.0111785										0	1	0	1	1	0	0	0	0	0	0	0	0	0															InChI=1S/C13H24/c1-3-5-7-9-11-13-12-10-8-6-4-2/h3-4H,1-2,5-13H2
180	C12H20O	unknown	NMOC_g				0.00795006	0.0142425	0.000551175			0.0225091				0.0052911		0	0	0	1	1	1	0	0	1	0	0	0	1	0															180.15116_C12H20O
180	C10H12O3	unknown	NMOC_g				0.0641687	0.0521845	0.0268082			0.11617				0.0337572		0	0	0	1	1	1	0	0	1	0	0	0	1	0															180.07816000000003_C10H12O3
180	C11H16S	unknown	NMOC_g				0.0148032	0.0236995	0.00266349			0.0471258				0.0114288		0	0	0	1	1	1	0	0	1	0	0	0	1	0															180.09716_C11H16S
181	C10H15NO2	unknown	NMOC_g				0.00182383	0.00307638	0.00020578			0.0132357				0.0019048		0	0	0	1	1	1	0	0	1	0	0	0	1	0															181.11016_C10H15NO2
182	C11H18O2	unknown	NMOC_g				0.00532332	0.00592488	0.000310127			0.00800885				0.00137569		0	0	0	1	1	1	0	0	1	0	0	0	1	0															182.13016000000002_C11H18O2
182	C10H14O3	unknown	NMOC_g				0.0171227	0.00831762	0.0172342			0.0467042				0.0107939		0	0	0	1	1	1	0	0	1	0	0	0	1	0															182.09416000000002_C10H14O3
182	C8H6O5	unknown	NMOC_g				0.00302205		0.000137187									0	0	0	1	0	1	0	0	0	0	0	0	0	0															182.02116_C8H6O5
182	C12H22O	unknown	NMOC_g				0.00696767	0.0126473	0.00051882			0.0118868				0.00296302		0	0	0	1	1	1	0	0	1	0	0	0	1	0															182.16616000000002_C12H22O
182	C13H26	unknown	NMOC_g					0.0178886	0.00123759			0.0112124						0	0	0	0	1	1	0	0	1	0	0	0	0	0															182.20316000000003_C13H26
182	C13H26	1-Tridecene	NMOC_g		0.00918439		0.0069518	0.053								0.00223645		0	1	0	1	1	0	0	0	0	0	0	0	1	0															InChI=1S/C13H26/c1-3-5-7-9-11-13-12-10-8-6-4-2/h3H,1,4-13H2,2H3
182	C13H26	C13H26 isomers	NMOC_g					0.0356								0.00127797		0	0	0	0	1	0	0	0	0	0	0	0	1	0															2069.34_1.096
182	C9H10O4	unknown	NMOC_g				0.026282	0.0329287	0.00707695			0.0386111				0.0171432		0	0	0	1	1	1	0	0	1	0	0	0	1	0															182.05716_C9H10O4
182	C14H14	unknown	NMOC_g				0.00834828	0.0214207	0.00147573			0.0118868				0.0052911		0	0	0	1	1	1	0	0	1	0	0	0	1	0															182.10916_C14H14
183	C10H17NO2	unknown	NMOC_g				0.000565453	0.00125334	0.000135245			0.0044681				0.000317466		0	0	0	1	1	1	0	0	1	0	0	0	1	0															183.12516000000002_C10H17NO2
184	C14H16	unknown	NMOC_g				0.0101244	0.0503615	0.00143755			0.0191369				0.00222226		0	0	0	1	1	1	0	0	1	0	0	0	1	0															184.12416000000002_C14H16
184	C11H20O2	unknown	NMOC_g				0.0064474	0.00979884	0.00113325			0.0102007				0.00179898		0	0	0	1	1	1	0	0	1	0	0	0	1	0															184.14616_C11H20O2
184	C12H24O	unknown	NMOC_g				0.00344246		0.000449741			0.00859898				0.00222226		0	0	0	1	0	1	0	0	1	0	0	0	1	0															184.18216_C12H24O
184	C12H24O	Dodecanal	NMOC_g					0.00718548										0	0	0	0	1	0	0	0	0	0	0	0	0	0															InChI=1S/C12H24O/c1-2-3-4-5-6-7-8-9-10-11-12-13/h12H,2-11H2,1H3
184	C13H28	Tridecane	NMOC_g		0.00383825		0.00450869	0.0581								0.000816204		0	1	0	1	1	0	0	0	0	0	0	0	1	0															InChI=1S/C13H28/c1-3-5-7-9-11-13-12-10-8-6-4-2/h3-13H2,1-2H3
184	C13H28	C13H28 isomers	NMOC_g				0.00208093	0.035								0.000408102		0	0	0	1	1	0	0	0	0	0	0	0	1	0															1909.4_1.021
184	C4H8O8	unknown	NMOC_g				0.000246985											0	0	0	1	0	0	0	0	0	0	0	0	0	0															184.02116_C4H8O8
185	C8H11NO4	unknown	NMOC_g				0.000963184	0.00159516	0.000138158			0.017198				0.00105822		0	0	0	1	1	1	0	0	1	0	0	0	1	0															185.06816_C8H11NO4
186	C14H18	unknown	NMOC_g				0.00782402	0.041702	0.000924554			0.018884				0.0019048		0	0	0	1	1	1	0	0	1	0	0	0	1	0															186.14016_C14H18
186	C12H26O	unknown	NMOC_g				0.00103054	0.00239274	0.000241048			0.00286633				0.000952399		0	0	0	1	1	1	0	0	1	0	0	0	1	0															186.19816_C12H26O
186	C9H14O4	unknown	NMOC_g				0.00442057	0.00774792	0.00377749			0.0137415				0.0043387		0	0	0	1	1	1	0	0	1	0	0	0	1	0															186.08816000000002_C9H14O4
186	C12H10O2	unknown	NMOC_g				0.00659268	0.00307638	0.00175059			0.0044681				0.00423288		0	0	0	1	1	1	0	0	1	0	0	0	1	0															186.06716_C12H10O2
186	C8H10O5	unknown	NMOC_g				0.0174154	0.0182304	0.00175204			0.0321197				0.00962981		0	0	0	1	1	1	0	0	1	0	0	0	1	0															186.05216000000001_C8H10O5
188	C14H20	unknown	NMOC_g				0.00708806		0.00119941			0.0186311				0.00116404		0	0	0	1	0	1	0	0	1	0	0	0	1	0															188.15616_C14H20
188	C14H20	C14H20 isomers	NMOC_g					0.035755										0	0	0	0	1	0	0	0	0	0	0	0	0	0															2584.18_1.91
188	C13H16O	unknown	NMOC_g				0.00528918	0.0120776	0.000920184			0.0142473				0.00349213		0	0	0	1	1	1	0	0	1	0	0	0	1	0															188.11916000000002_C13H16O
188	C12H12O2	unknown	NMOC_g				0.0104827	0.00922914	0.00220179			0.0193055				0.00835994		0	0	0	1	1	1	0	0	1	0	0	0	1	0															188.08316000000002_C12H12O2
189	C12H15NO	unknown	NMOC_g				0.000687753	0.0011394	0.000137187			0.00581696				0.00052911		0	0	0	1	1	1	0	0	1	0	0	0	1	0															189.11516_C12H15NO
189	C11H11NO2	unknown	NMOC_g				0.0013203	0.00353214	0.000241048			0.00927341				0.00105822		0	0	0	1	1	1	0	0	1	0	0	0	1	0															189.07816000000003_C11H12NO2
190	C11H10O3	unknown	NMOC_g				0.0096019	0.00877338	0.00192256			0.016102				0.0071959		0	0	0	1	1	1	0	0	1	0	0	0	1	0															190.06216_C11H10O3
190	C12H14O2	unknown	NMOC_g				0.00791819	0.0103685	0.00154189			0.0205701				0.0071959		0	0	0	1	1	1	0	0	1	0	0	0	1	0															190.09916_C12H14O2
190	C14H22	unknown	NMOC_g				0.0101136	0.0424996	0.00270167			0.0316139				0.00370377		0	0	0	1	1	1	0	0	1	0	0	0	1	0															190.17116000000001_C14H22
190	C7H10O6	unknown	NMOC_g				0.00515481	0.00273456	0.000551175			0.0069129				0.00253973		0	0	0	1	1	1	0	0	1	0	0	0	1	0															190.04716000000002_C7H10O6
192	C10H8O4	unknown	NMOC_g				0.00231302	0.00216486	0.000548262			0.0022762				0.00105822		0	0	0	1	1	1	0	0	1	0	0	0	1	0															192.04216000000002_C10H8O4
192	C11H12O3	unknown	NMOC_g				0.0100378	0.00877338	0.00332775			0.031361				0.00931234		0	0	0	1	1	1	0	0	1	0	0	0	1	0															192.07816000000003_C11H12O3
192	C12H16O2	unknown	NMOC_g				0.0047514	0.00706428	0.000721687			0.0154276				0.00423288		0	0	0	1	1	1	0	0	1	0	0	0	1	0															192.11416000000003_C12H16O2
192	C13H20O	unknown	NMOC_g				0.00617134	0.0126473	0.000823121			0.0143316				0.00253973		0	0	0	1	1	1	0	0	1	0	0	0	1	0															192.15116_C13H20O
192	C14H24	unknown	NMOC_g				0.00417883	0.0182304	0.000721687			0.012224				0.00232809		0	0	0	1	1	1	0	0	1	0	0	0	1	0															192.18716_C14H24
194	C10H10O4	unknown	NMOC_g				0.00881473	0.0107104	0.00106417			0.00725012				0.00370377		0	0	0	1	1	1	0	0	1	0	0	0	1	0															194.05716_C10H10O4
194	C11H14O3	unknown	NMOC_g				0.0127349	0.0107104	0.0173193			0.0762948				0.0101589		0	0	0	1	1	1	0	0	1	0	0	0	1	0															194.09416000000002_C11H14O3
194	C12H18O2	unknown	NMOC_g				0.00351083	0.00638064	0.000138158			0.0106223				0.00232809		0	0	0	1	1	1	0	0	1	0	0	0	1	0															194.13016000000002_C12H18O2
194	C13H22O	unknown	NMOC_g				0.00376783	0.0091152	0.000241048			0.00876758				0.00158733		0	0	0	1	1	1	0	0	1	0	0	0	1	0															194.16616000000002_C13H22O
194	C14H26	unknown	NMOC_g				0.00179609	0.00535518	0.000756955			0.00725012				0.00126986		0	0	0	1	1	1	0	0	1	0	0	0	1	0															194.20316000000003_C14H26
194	C14H26	C14H26 isomers	NMOC_g					0.0215										0	0	0	0	1	0	0	0	0	0	0	0	0	0															2234.29_1.285
195	C11H17NO2	unknown	NMOC_g				0.00230326	0.0039879	0.000138158			0.0172823				0.00253973		0	0	0	1	1	1	0	0	1	0	0	0	1	0															195.12516000000002_C11H17NO2
195	C2F3Cl3	Trichlorotrifluoroethane	NMOC_g													0.00025		0	0	0	0	0	0	0	0	0	0	0	0	4	0													5.7735e-05		InChI=1S/C2Cl3F3/c3-1(4,5)2(6,7)8
196	C14H28	unknown	NMOC_g				0.00293913		0.000654065			0.00969493						0	0	0	1	0	1	0	0	1	0	0	0	0	0															196.21816_C14H28
196	C14H28	1-Tetradecene	NMOC_g		0.00740235			0.0257527								0.00222962		0	1	0	0	1	0	0	0	0	0	0	0	1	0															InChI=1S/C14H28/c1-3-5-7-9-11-13-14-12-10-8-6-4-2/h3H,1,4-14H2,2H3
196	C14H28	C14H28 isomers	NMOC_g					0.0127125										0	0	0	0	1	0	0	0	0	0	0	0	0	0															2109.33_1.082
196	C15H16	unknown	NMOC_g				0.00534332	0.0150401	0.00109652			0.00944201				0.00158733		0	0	0	1	1	1	0	0	1	0	0	0	1	0															196.12416000000002_C15H16
196	C10H12O4	unknown	NMOC_g				0.0068345	0.0111661	0.00340702			0.0235207				0.0081483		0	0	0	1	1	1	0	0	1	0	0	0	1	0															196.07316_C10H12O4
196	C13H24O	unknown	NMOC_g				0.00303986	0.00888732	0.000517363			0.0069129				0.00169315		0	0	0	1	1	1	0	0	1	0	0	0	1	0															196.18216_C13H24O
196	C12H20O2	unknown	NMOC_g				0.00310334	0.00558306	0.000343938			0.00564835				0.00105822		0	0	0	1	1	1	0	0	1	0	0	0	1	0															196.14616_C12H20O2
196	C12H20O2	Bornyl acetate	NMOC_g		0.0548322													0	1	0	0	0	0	0	0	0	0	0	0	0	0															InChI=1S/C12H20O2/c1-8(13)14-10-7-9-5-6-12(10,4)11(9,2)3/h9-10H,5-7H2,1-4H3
197	C10H15NO3	unknown	NMOC_g				0.000862575	0.00182304	0.000138158			0.00657569				0.00052911		0	0	0	1	1	1	0	0	1	0	0	0	1	0															197.10416_C10H15NO3
197	C9H11NO4	unknown	NMOC_g				0.000635748	0.00125334	0.000138158			0.00396227				0.00052911		0	0	0	1	1	1	0	0	1	0	0	0	1	0															197.06816_C9H11NO4
198	C10H14O4	unknown	NMOC_g				0.00392684	0.00478548	0.0026457			0.0117182				0.00359795		0	0	0	1	1	1	0	0	1	0	0	0	1	0															198.08816000000002_C10H14O4
198	C12H22O2	unknown	NMOC_g				0.00930791	0.0101407	0.000789309			0.00927341				0.00148151		0	0	0	1	1	1	0	0	1	0	0	0	1	0															198.16116000000002_C12H22O2
198	C13H10O2	unknown	NMOC_g				0.00302247	0.00432972	0.000790766			0.0046367				0.00211644		0	0	0	1	1	1	0	0	1	0	0	0	1	0															198.06716_C13H10O2
198	C13H26O	unknown	NMOC_g				0.00304086	0.0127613	0.000552631			0.0108752				0.00243391		0	0	0	1	1	1	0	0	1	0	0	0	1	0															198.19816_C13H26O
198	C14H14O	unknown	NMOC_g				0.00311752	0.0028485	0.000961278			0.00665999				0.00222226		0	0	0	1	1	1	0	0	1	0	0	0	1	0															198.10416_C14H14O
198	C14H30	Tetradecane	NMOC_g					0.0263								0.000510128		0	0	0	0	1	0	0	0	0	0	0	0	1	0															InChI=1S/C14H30/c1-3-5-7-9-11-13-14-12-10-8-6-4-2/h3-14H2,1-2H3
198	C15H18	unknown	NMOC_g				0.00517487	0.0511591	0.000718774			0.0114653				0.00105822		0	0	0	1	1	1	0	0	1	0	0	0	1	0															198.14016_C15H18
198	C9H10O5	unknown	NMOC_g				0.00180247	0.00273456	0.000446828			0.00269772				0.00169315		0	0	0	1	1	1	0	0	1	0	0	0	1	0															198.05216000000001_C9H10O5
199	C10H17NO3	unknown	NMOC_g				0.000604312	0.00136728	0.000137187			0.00564835				0.000317466		0	0	0	1	1	1	0	0	1	0	0	0	1	0															199.12016_C10H17NO3
200	C10H16O4	unknown	NMOC_g				0.00303194	0.00592488	0.00243264			0.0091891				0.00201062		0	0	0	1	1	1	0	0	1	0	0	0	1	0															200.10416_C10H16O4
200	C12H24O2	unknown	NMOC_g				0.00634767	0.00638064	0.000274859			0.00977923				0.00116404		0	0	0	1	1	1	0	0	1	0	0	0	1	0															200.17716000000001_C12H24O2
200	C14H16O	unknown	NMOC_g				0.00255479	0.0045576	0.000755498			0.00606987				0.00158733		0	0	0	1	1	1	0	0	1	0	0	0	1	0															200.11916000000002_C14H16O
200	C15H20	unknown	NMOC_g				0.00604569		0.000956909			0.0138258				0.00105822		0	0	0	1	0	1	0	0	1	0	0	0	1	0															200.15616_C15H20
200	C15H20	À-calacorene	NMOC_g					0.0267883										0	0	0	0	1	0	0	0	0	0	0	0	0	0															InChI=1S/C15H20/c1-10(2)13-8-6-12(4)14-7-5-11(3)9-15(13)14/h5-7,9-10,13H,8H2,1-4H3/t13-/m0/s1
200	C8H8O6	unknown	NMOC_g				0.000931055	0.00091152	0.000171969			0.00109595				0.000740754		0	0	0	1	1	1	0	0	1	0	0	0	1	0															200.03116_C8H8O6
200	C9H12O5	unknown	NMOC_g				0.00297447	0.00421578	0.000480639			0.00741873				0.00306884		0	0	0	1	1	1	0	0	1	0	0	0	1	0															200.06816_C9H12O5
202	C15H22	unknown	NMOC_g				0.0109511		0.00208433			0.0277359				0.00137569		0	0	0	1	0	1	0	0	1	0	0	0	1	0															202.17116000000001_C15H22
202	C15H22	Calamenene	NMOC_g		0.00932147			0.0369153										0	1	0	0	1	0	0	0	0	0	0	0	0	0															InChI=1S/C15H22/c1-10(2)13-8-6-12(4)14-7-5-11(3)9-15(13)14/h5,7,9-10,12-13H,6,8H2,1-4H3
202	C12H10O3	unknown	NMOC_g				0.00289241	0.0028485	0.000824577			0.00370936				0.0019048		0	0	0	1	1	1	0	0	1	0	0	0	1	0															202.06216_C12H10O3
202	C9H14O5	unknown	NMOC_g				0.00257724	0.00262062	0.00117143			0.0044681				0.00137569		0	0	0	1	1	1	0	0	1	0	0	0	1	0															202.08316000000002_C9H14O5
203	C12H13NO2	unknown	NMOC_g				0.000430888	0.00091152	0.000137187			0.00328784				0.000317466		0	0	0	1	1	1	0	0	1	0	0	0	1	0															203.09416000000002_C12H13NO2
204	C15H24	Sesquiterpenes	NMOC_g		0.0017			0.309233	0.0133131			0.143822				0.0121695	0.022443	0	1	0	0	1	2	0	0	1	0	0	0	1	1						0.00478985									204.18716_C15H24
204	C15H24	B-caryophyllene	NMOC_g		0.0100069													0	1	0	0	0	0	0	0	0	0	0	0	0	0															InChI=1S/C15H24/c1-11-6-5-7-12(2)13-10-15(3,4)14(13)9-8-11/h6,13-14H,2,5,7-10H2,1,3-4H3/b11-6+/t13-,14-/m1/s1
204	C15H24	Germacrene d	NMOC_g		0.00836191		0.0141501											0	1	0	1	0	0	0	0	0	0	0	0	0	0															InChI=1S/C15H24/c1-12(2)15-10-8-13(3)6-5-7-14(4)9-11-15/h7-8,10,12,15H,3,5-6,9,11H2,1-2,4H3/b10-8+,14-7+/t15-/m0/s1
204	C15H24	Copaene	NMOC_g		0.00671694		0.00587587											0	1	0	1	0	0	0	0	0	0	0	0	0	0															InChI=1S/C15H24/c1-9(2)11-7-8-15(4)12-6-5-10(3)14(15)13(11)12/h5,9,11-14H,6-8H2,1-4H3
204	C15H24	À-cubebene	NMOC_g		0.00699111													0	1	0	0	0	0	0	0	0	0	0	0	0	0															InChI=1S/C15H24/c1-9(2)12-6-5-11(4)15-8-7-10(3)13(15)14(12)15/h7,9,11-14H,5-6,8H2,1-4H3
204	C15H24	Cadinene isomers	NMOC_g		0.0722414		0.025662											0	1	0	1	0	0	0	0	0	0	0	0	0	0															2484.21_1.448
204	C15H24	C15H24 isomers	NMOC_g		0.0191913		0.0209853											0	1	0	1	0	0	0	0	0	0	0	0	0	0															2319.26_1.39
204	C8H12O6	unknown	NMOC_g				0.00826937	0.0051273	0.00123468			0.0123926				0.00560857		0	0	0	1	1	1	0	0	1	0	0	0	1	0															204.06316_C8H12O6
204	C12H12O3	unknown	NMOC_g				0.00844053	0.00729216	0.00185348			0.0134886				0.00497364		0	0	0	1	1	1	0	0	1	0	0	0	1	0															204.07816000000003_C12H12O3
205	C12H15NO2	unknown	NMOC_g				0.000513394	0.00079758	0.000137187			0.00362506				0.000317466		0	0	0	1	1	1	0	0	1	0	0	0	1	0															205.11016_C12H15NO2
205	C11H11NO3	unknown	NMOC_g				0.00060631	0.00125334	0.000171969			0.00379367				0.000423288		0	0	0	1	1	1	0	0	1	0	0	0	1	0															205.07316_C11H11NO3
206	C12H14O3	unknown	NMOC_g				0.0043814	0.00410184	0.00120233			0.0102851				0.00306884		0	0	0	1	1	1	0	0	1	0	0	0	1	0															206.09416000000002_C12H14O3
206	C15H26	unknown	NMOC_g				0.00371461		0.000583529			0.012224				0.00169315		0	0	0	1	0	1	0	0	1	0	0	0	1	0															206.20316000000003_C15H26
206	C15H26	Patchulane	NMOC_g					0.0161493										0	0	0	0	1	0	0	0	0	0	0	0	0	0															InChI=1S/C15H26/c1-10-7-8-15-11(2)5-6-12(9-13(10)15)14(15,3)4/h10-13H,5-9H2,1-4H3
206	C15H26	Ledane	NMOC_g					0.012961										0	0	0	0	1	0	0	0	0	0	0	0	0	0															InChI=1S/C15H26/c1-9-6-8-12-14(15(12,3)4)13-10(2)5-7-11(9)13/h9-14H,5-8H2,1-4H3/t9-,10-,11+,12+,13+,14+/m0/s1
206	C15H26	C15H26 isomers	NMOC_g					0.0119907										0	0	0	0	1	0	0	0	0	0	0	0	0	0															2504.2_1.373
206	C9H18O5	unknown	NMOC_g				0.00432865	0.00672246	0.000923098			0.00817746				0.00211644		0	0	0	1	1	1	0	0	1	0	0	0	1	0															206.11516_C9H18O5
206	C11H10O4	unknown	NMOC_g				0.0020533	0.00182304	0.00051445			0.00295063				0.00126986		0	0	0	1	1	1	0	0	1	0	0	0	1	0															206.05716_C11H10O4
208	C11H12O4	unknown	NMOC_g				0.00292007	0.00353214	0.00161389			0.0116339				0.0028572		0	0	0	1	1	1	0	0	1	0	0	0	1	0															208.07316_C11H12O4
208	C13H20O2	unknown	NMOC_g				0.00387335	0.00649458	0.000955452			0.0142473				0.0019048		0	0	0	1	1	1	0	0	1	0	0	0	1	0															208.14616_C13H20O2
208	C14H24O	unknown	NMOC_g				0.0028799	0.00763398	0.000480639			0.0067443				0.000952399		0	0	0	1	1	1	0	0	1	0	0	0	1	0															208.18216_C14H24O
208	C15H28	unknown	NMOC_g				0.00147885	0.00615276	0.000274859			0.0044681				0.00105822		0	0	0	1	1	1	0	0	1	0	0	0	1	0															208.21816_C15H28
209	C12H19NO2	unknown	NMOC_g				0.00177698	0.00330426	0.000137187			0.0147531				0.00211644		0	0	0	1	1	1	0	0	1	0	0	0	1	0															209.14116_C12H19NO2
210	C11H14O4	unknown	NMOC_g				0.00347318	0.0074061	0.00319251			0.0157648				0.0028572		0	0	0	1	1	1	0	0	1	0	0	0	1	0															210.08816000000002_C11H14O4
210	C14H26O	unknown	NMOC_g				0.00344943	0.00877338	0.000618797			0.00758733				0.00116404		0	0	0	1	1	1	0	0	1	0	0	0	1	0															210.19816_C14H26O
210	C15H14O	unknown	NMOC_g				0.00299219	0.00603882	0.0010289			0.00784024				0.00222226		0	0	0	1	1	1	0	0	1	0	0	0	1	0															210.10416_C15H14O
210	C15H30	unknown	NMOC_g				0.00342732		0.000551175			0.0102851				0.00201062		0	0	0	1	0	1	0	0	1	0	0	0	1	0															210.23416_C15H30
210	C15H30	1-Pentadecene	NMOC_g					0.0201695										0	0	0	0	1	0	0	0	0	0	0	0	0	0															InChI=1S/C15H30/c1-3-5-7-9-11-13-15-14-12-10-8-6-4-2/h3H,1,4-15H2,2H3
212	C15H32	Pentadecane	NMOC_g					0.0091										0	0	0	0	1	0	0	0	0	0	0	0	0	0															InChI=1S/C15H32/c1-3-5-7-9-11-13-15-14-12-10-8-6-4-2/h3-15H2,1-2H3
212	C15H32	C15H32 isomers	NMOC_g					0.0354										0	0	0	0	1	0	0	0	0	0	0	0	0	0															2259.28_1.03
244	C3H3Br2Cl	1,2-Dibromo-3-chloropropene	NMOC_g													0.0003		0	0	0	0	0	0	0	0	0	0	0	0	1	0															InChI=1S/C3H3Br2Cl/c4-1-3(5)2-6/h1H,2H2
250	CHBr3	Tribromomethane	NMOC_g		0.000274161			0.005										0	1	0	0	1	0	0	0	0	0	0	0	0	0															InChI=1S/CHBr3/c2-1(3)4/h1H
		PM2.5*	PM size	17.5712	12.7706	9.105	17.936	24.78	15.1142	8.808	4.4185	12.6588		1.2	7.39	12.7363	9.68406	4	4	4	6	3	3	5	5	3	0	2	1	9	5	3.51108	6.74649	4.63014	11.1396	6.52956	6.97116	6.41554	3.68318	9.63606		0.565685		6.78404	1.72694	PM2.5*
		PM10	PM size			18.5									14.43			0	0	1	0	0	0	0	0	0	0	0	1	0	0															PM10
		OA	PM organic	27.34	6.6		17.0931		10.7784		2.082	2.309				11.2216	7.35733	1	1	0	8	0	3	0	2	2	0	0	0	9	3				7.33853		10.5624		0.407294	1.40573				9.07063	8.03017	OA
		BC	PM elemental	0.349667	0.13	0.3438	0.435155	0.0160333	0.623642	0.594633	0.2905	0.123017	0.0714		0.455	0.44574	1.975	3	1	5	7	3	3	6	11	12	1	0	1	15	2	0.040501		0.259022	0.197735	0.0208063	0.713316	0.428569	0.254796	0.126228				0.293411	1.87383	BC
		OC	PM organic	6.48667		3.99	10.4305	13.1733	10.84	4.44	2.1161	8.9853	2.6418	0.6	4.82	9.4714	5.47245	3	0	5	4	3	1	6	4	1	1	2	1	10	2	6.7049		2.23672	1.34763	7.56969		4.23122	1.39415			0.282843		4.01047	0.286308	OC
		EC	PM elemental					0.432		0.143	0.605267	0.7512		0.1		0.49916	0.1916	0	0	0	0	2	0	2	3	1	0	2	0	5	1					0.271529		0.0806102	0.444953			0		0.295289		EC
		Water-soluble OC fraction	PM organic					5.212										0	0	0	0	2	0	0	0	0	0	0	0	0	0					4.56508										WSOC
		Water-insoluble OC fraction	PM organic					10.416										0	0	0	0	1	0	0	0	0	0	0	0	0	0															WIOC
88.02	C2O4-2	Oxalate	PM ion	0.0055		0.04									0.02			1	0	2	0	0	0	0	0	0	0	0	1	0	0			0.0282843												InChI=1S/C2H2O4/c3-1(4)2(5)6/h(H,3,4)(H,5,6)/p-2
35.45	Cl-	chloride	PM ion	0.47175	0.34	0.114	0.1355	0.06412	0.362667	0.7418	0.255	1.2638			0.12	0.94605	0.1091	4	1	5	6	2	3	1	1	1	0	0	1	7	1	0.183627		0.0856154	0.0894198	0.012134	0.331815							0.363902		InChI=1S/ClH/h1H/p-1
62.005	NO3-	nitrate	PM ion	0.192875	0.13	0.0862	0.547687	0.025	0.47	0.1082	0.01885	0.0129333			0.07	0.237909	0.02975	4	2	5	7	2	3	1	2	3	0	0	1	11	2	0.348852	0.0565685	0.0642277	0.342706	0.0313955	0.6755		0.0210011	0.0155053				0.22525	0.0392444	InChI=1S/NO3/c2-1(3)4/q-1
94.971	O4P-3	phosphate	PM ion	0.0045		0.0056									0.0005			1	0	1	0	0	0	0	0	0	0	0	1	0	0															InChI=1S/H3O4P/c1-5(2,3)4/h(H3,1,2,3,4)/p-3
96.07	O4S-2	sulfate	PM ion	0.08825	0.115	0.08692	0.1245	0.06094	0.425667	0.0594	0.0172	0.0310667			0.095	0.116067	0.0174333	4	2	5	6	2	3	1	3	3	0	0	1	9	3	0.110074	0.0777817	0.0859955	0.102477	0.0516754	0.399608		0.00886115	0.0316893				0.0830102	0.0157912	InChI=1S/H2O4S/c1-5(2,3)4/h(H2,1,2,3,4)/p-2
22.9898	Na	sodium	PM ion	0.02											0.015	0.82		1	0	0	0	0	0	0	0	0	0	0	1	1	0															InChI=1S/Na
18.039	H4N+	ammonium	PM ion	0.147375	0.1	0.014825	0.191471	0.05156	0.338	0.3708	0.0893	0.277667			0.002	0.303456	0.0706	4	2	4	7	2	3	1	1	3	0	0	1	9	1	0.127607	0.0141421	0.0133737	0.135222	0.0518168	0.533846			0.329061				0.19337		InChI=1S/H3N/h1H3/p+1
39.0983	K	potassium	PM ion	0.108	0.33		0.172	0.01698	0.9						0.17	0.36775		2	1	0	4	1	1	0	0	0	0	0	1	5	0	0.039598			0.175307									0.219397		InChI=1S/K
24.305	Mg	magnesium	PM ion												0.015			0	0	0	0	0	0	0	0	0	0	0	1	0	0															InChI=1S/Mg
40.08	Ca	calcium	PM ion	0.021				0.0059							0.01	0.006		1	0	0	0	1	0	0	0	0	0	0	1	1	0															InChI=1S/Ca
22.9898	Na+	sodium ion	PM ion	0.0055		0.00635		0.00447			0.0038	0.0567						1	0	2	0	2	0	0	1	1	0	0	0	0	0			0.00657609		0.00504874										InChI=1S/Na/q+1
39.0983	K+	potassium ion	PM ion	0.226		0.293333		0.02362		0.1608	0.1419	0.0766				0.8289	0.0115	1	0	3	0	2	0	1	1	1	0	0	0	1	1			0.109697		0.0270398										InChI=1S/K/q+1
24.305	Mg+2	magnesium ion	PM ion	0.016		0.04												1	0	2	0	0	0	0	0	0	0	0	0	0	0			0.0141421												InChI=1S/Mg/q+2
40.08	Ca+2	calcium ion	PM ion	0.0205		0.085												1	0	2	0	0	0	0	0	0	0	0	0	0	0			0.0353553												InChI=1S/Ca/q+2
70.9	Cl2	Chlorine	PM ion					0.04048			0.078	0.3855				0.40025	0.196333	0	0	0	0	1	0	0	2	2	0	0	0	4	3								0.0608112	0.163342				0.111691	0.26567	InChI=1S/Cl2/c1-2
		PAH	PM ion								0.0185	0.0125				0.006	0.0103333	0	0	0	0	0	0	0	2	2	0	0	0	4	3								0.00919239	0.0106066				0.00216025	0.0110151	PAH
		EF Babs 370 (m2/kg)	PM ion								21.9485	15.1045				23.7688	32.015	0	0	0	0	0	0	0	2	2	0	0	0	4	1								3.82333	1.8109				8.01219		Babs_370
		EF Babs 880 (m2/kg)	PM ion								2.832	0.955				3.67425	11.11	0	0	0	0	0	0	0	2	2	0	0	0	4	1								1.71544	0.418607				1.22667		Babs_880
18.9984	F-	Fluoride	PM ion	0.001	0.033		0.044	0.0114	0.028	0.0036	0.0065	0.0057				0.046	0.0102	1	1	0	1	1	1	1	1	1	0	0	0	1	1															InChI=1S/FH/h1H/p-1
46.006	NO2	Nitrite	PM ion					0.020075										0	0	0	0	1	0	0	0	0	0	0	0	0	0															InChI=1S/HNO2/c2-1-3/h(H,2,3)/p-1
58.69	Ni	Nickel	PM metal					0.000266667		0.001						0.002		0	0	0	0	1	0	1	0	0	0	0	0	1	0															InChI=1S/Ni
63.55	Cu	Copper	PM metal					0.00828			0.0004	0.0001					0.0003	0	0	0	0	2	0	0	1	1	0	0	0	0	1					0.00639225										InChI=1S/Cu
74.92	As	Arsenic	PM metal					0.0001125			0.0003	0.0001					0.0001	0	0	0	0	2	0	0	1	1	0	0	0	0	1					1.76777e-05										InChI=1S/As
78.97	Se	Selenium	PM metal					0.00034			0.0005						0.0001	0	0	0	0	1	0	0	1	0	0	0	0	0	1															InChI=1S/Se
112.41	Cd	Cadmium	PM metal					0.000866667		0.0002	0.0002	0.0001				0.0001	0.0001	0	0	0	0	1	0	1	1	1	0	0	0	1	1															InChI=1S/Cd
121.76	Sb	Antimony	PM metal					0.000633333			0.0004						0.0018	0	0	0	0	1	0	0	1	0	0	0	0	0	1															InChI=1S/Sb
207	Pb	Lead	PM metal					0.0007125			0.0006	0.0006					0.0042	0	0	0	0	2	0	0	1	1	0	0	0	0	1					1.76777e-05										InChI=1S/Pb
55.84	Fe	Fe	PM metal					0.00809										0	0	0	0	2	0	0	0	0	0	0	0	0	0					0.00479418										InChI=1S/Fe
65.4	Zn	Zn	PM metal					0.00427										0	0	0	0	2	0	0	0	0	0	0	0	0	0					0.00371938										InChI=1S/Zn
137.33	Ba	Ba	PM metal					0.00235										0	0	0	0	2	0	0	0	0	0	0	0	0	0					0.00304056										InChI=1S/Ba
26.9815	Al	Aluminum	PM metal					0.02108										0	0	0	0	1	0	0	0	0	0	0	0	0	0															InChI=1S/Al
28.085	Si	Silicon	PM metal					0.0027										0	0	0	0	1	0	0	0	0	0	0	0	0	0															InChI=1S/Si
30.9738	P	Phosphorus	PM metal					0.0001										0	0	0	0	1	0	0	0	0	0	0	0	0	0															InChI=1S/P
32.07	S	Sulfur	PM metal					0.03018										0	0	0	0	1	0	0	0	0	0	0	0	0	0															InChI=1S/S
44.9559	Sc	Scandium	PM metal					0.01575										0	0	0	0	1	0	0	0	0	0	0	0	0	0															InChI=1S/Sc
47.87	Ti	Titanium	PM metal					0.00134										0	0	0	0	1	0	0	0	0	0	0	0	0	0															InChI=1S/Ti
50.941	V	Vanadium	PM metal					0.0001										0	0	0	0	1	0	0	0	0	0	0	0	0	0															InChI=1S/V
51.996	Cr	Chromium	PM metal					0.00025										0	0	0	0	1	0	0	0	0	0	0	0	0	0															InChI=1S/Cr
54.938	Mn	Manganese	PM metal					0.0009										0	0	0	0	1	0	0	0	0	0	0	0	0	0															InChI=1S/Mn
159.81	Br	Bromine	PM metal					0.00248										0	0	0	0	1	0	0	0	0	0	0	0	0	0															InChI=1S/Br2/c1-2
85.468	Rb	Rubidium	PM metal					0.00032										0	0	0	0	1	0	0	0	0	0	0	0	0	0															InChI=1S/Rb
87.6	Sr	Strontium	PM metal					0.0011										0	0	0	0	1	0	0	0	0	0	0	0	0	0															InChI=1S/Sr
88.9058	Y	Yttrium	PM metal					0.00074										0	0	0	0	1	0	0	0	0	0	0	0	0	0															InChI=1S/Y
91.22	Zr	Zirconium	PM metal					0.00102										0	0	0	0	1	0	0	0	0	0	0	0	0	0															InChI=1S/Zr
92.9064	Nb	Niobium	PM metal					0.0003										0	0	0	0	1	0	0	0	0	0	0	0	0	0															InChI=1S/Nb
96	Mo	Molybdenum	PM metal					0.00058										0	0	0	0	1	0	0	0	0	0	0	0	0	0															InChI=1S/Mo
107.868	Ag	Silver	PM metal					0.000525										0	0	0	0	1	0	0	0	0	0	0	0	0	0															InChI=1S/Ag
114.82	In	Indium	PM metal					0.00078										0	0	0	0	1	0	0	0	0	0	0	0	0	0															InChI=1S/In
118.71	Sn	Tin	PM metal					0.00156										0	0	0	0	1	0	0	0	0	0	0	0	0	0															InChI=1S/Sn
132.905	Cs	Cesium	PM metal					0.00442										0	0	0	0	1	0	0	0	0	0	0	0	0	0															InChI=1S/Cs
138.905	La	Lanthanum	PM metal					0.01228										0	0	0	0	1	0	0	0	0	0	0	0	0	0															InChI=1S/La
183.8	W	Wolfram	PM metal					0.00135										0	0	0	0	1	0	0	0	0	0	0	0	0	0															InChI=1S/W
196.967	Au	Gold	PM metal					0.0005										0	0	0	0	1	0	0	0	0	0	0	0	0	0															InChI=1S/Au
238.029	U	Uranium	PM metal					0.00078										0	0	0	0	1	0	0	0	0	0	0	0	0	0															InChI=1S/U
		organics	NMOC_p	5.7														1	0	0	0	0	0	0	0	0	0	0	0	0	0															org
178.23	C14H10	Phenanthrene	NMOC_p							0.0005	0.0006	0.0016				0.0002	0.0005	0	0	0	0	0	0	1	1	1	0	0	0	1	1															InChI=1S/C14H10/c1-3-7-13-11(5-1)9-10-12-6-2-4-8-14(12)13/h1-10H
178.23	C14H10	Anthracene	NMOC_p					0.0001			0.0002	0.001				0.0001	0.0001	0	0	0	0	1	0	0	1	1	0	0	0	1	1															InChI=1S/C14H10/c1-2-6-12-10-14-8-4-3-7-13(14)9-11(12)5-1/h1-10H
202.25	C16H10	Fluoranthene	NMOC_p					0.0004		0.0021	0.0039	0.0052				0.0015	0.0011	0	0	0	0	1	0	1	1	1	0	0	0	1	1															InChI=1S/C16H10/c1-2-8-13-12(7-1)14-9-3-5-11-6-4-10-15(13)16(11)14/h1-10H
202.25	C16H10	Pyrene	NMOC_p					0.0007		0.0025	0.0048	0.0049				0.0016	0.0014	0	0	0	0	1	0	1	1	1	0	0	0	1	1															InChI=1S/C16H10/c1-3-11-7-9-13-5-2-6-14-10-8-12(4-1)15(11)16(13)14/h1-10H
216.28	C17H12	Methylfluoranthene	NMOC_p					0.0005		0.001	0.0016	0.0018				0.0007	0.0003	0	0	0	0	1	0	1	1	1	0	0	0	1	1															InChI=1S/C17H12/c1-11-9-12-5-4-8-15-13-6-2-3-7-14(13)16(10-11)17(12)15/h2-10H,1H3
192.25	C15H12	9-Methylanthracene	NMOC_p							0.0004	0.0001	0.0003				0.0006	0.0002	0	0	0	0	0	0	1	1	1	0	0	0	1	1															InChI=1S/C15H12/c1-11-14-8-4-2-6-12(14)10-13-7-3-5-9-15(11)13/h2-10H,1H3
226.3	C18H10	Benzo(ghi)fluoranthene	NMOC_p					0.0001		0.0013	0.0048	0.0045				0.0011	0.0012	0	0	0	0	1	0	1	1	1	0	0	0	1	1															InChI=1S/C18H10/c1-3-11-7-9-13-10-8-12-4-2-6-15-14(5-1)16(11)18(13)17(12)15/h1-10H
226.3	C18H10	Cyclopenta(cd)pyrene	NMOC_p					0.0001		0.0008	0.0064	0.005				0.0003	0.0005	0	0	0	0	1	0	1	1	1	0	0	0	1	1															InChI=1S/C18H10/c1-2-11-4-6-13-7-5-12-8-9-15-10-14(3-1)16(11)18(13)17(12)15/h1-10H
228.3	C18H12	Benz(a)anthracene	NMOC_p					0.0003		0.0018	0.0042	0.0043				0.0008	0.0006	0	0	0	0	1	0	1	1	1	0	0	0	1	1															InChI=1S/C18H12/c1-2-7-15-12-18-16(11-14(15)6-1)10-9-13-5-3-4-8-17(13)18/h1-12H
228.3	C18H12	Chrysene	NMOC_p					0.0007		0.0017	0.0031	0.0027				0.0007	0.0009	0	0	0	0	1	0	1	1	1	0	0	0	1	1															InChI=1S/C18H12/c1-3-7-15-13(5-1)9-11-18-16-8-4-2-6-14(16)10-12-17(15)18/h1-12H
242.3	C19H14	1-Methylchrysene	NMOC_p					0.0002		0.0004	0.0005	0.0005				0.0002		0	0	0	0	1	0	1	1	1	0	0	0	1	0															InChI=1S/C19H14/c1-13-5-4-8-17-15(13)11-12-18-16-7-3-2-6-14(16)9-10-19(17)18/h2-12H,1H3
234.3	C18H18	Retene	NMOC_p					0.0004				0.0003				0.0003	0.0011	0	0	0	0	1	0	0	0	1	0	0	0	1	1															InChI=1S/C18H18/c1-12(2)14-7-10-17-15(11-14)8-9-16-13(3)5-4-6-18(16)17/h4-12H,1-3H3
252.3	C20H12	Benzo(b)fluoranthene	NMOC_p					0.0003		0.0013	0.0036	0.0035				0.0008	0.0007	0	0	0	0	1	0	1	1	1	0	0	0	1	1															InChI=1S/C20H12/c1-2-7-14-13(6-1)12-19-16-9-4-3-8-15(16)18-11-5-10-17(14)20(18)19/h1-12H
252.3	C20H12	Benzo(k)fluoranthene	NMOC_p							0.0005	0.0015	0.0015				0.0003	0.0006	0	0	0	0	0	0	1	1	1	0	0	0	1	1															InChI=1S/C20H12/c1-2-6-15-12-19-17-10-4-8-13-7-3-9-16(20(13)17)18(19)11-14(15)5-1/h1-12H
252.3	C20H12	Benzo(j)fluoranthene	NMOC_p							0.0016	0.0016	0.0017				0.0002	0.0002	0	0	0	0	0	0	1	1	1	0	0	0	1	1															InChI=1S/C20H12/c1-2-8-15-13(5-1)11-12-17-16-9-3-6-14-7-4-10-18(19(14)16)20(15)17/h1-12H
252.3	C20H12	Benzo(e)pyrene	NMOC_p					0.0004		0.0009	0.0016	0.0017				0.0006	0.0006	0	0	0	0	1	0	1	1	1	0	0	0	1	1															InChI=1S/C20H12/c1-2-8-16-15(7-1)17-9-3-5-13-11-12-14-6-4-10-18(16)20(14)19(13)17/h1-12H
252.3	C20H12	Benzo(a)pyrene	NMOC_p					0.0001		0.0009	0.0035	0.003				0.0006	0.0006	0	0	0	0	1	0	1	1	1	0	0	0	1	1															InChI=1S/C20H12/c1-2-7-17-15(4-1)12-16-9-8-13-5-3-6-14-10-11-18(17)20(16)19(13)14/h1-12H
252.3	C20H12	Perylene	NMOC_p					0.0001			0.0007	0.0007					0.0001	0	0	0	0	1	0	0	1	1	0	0	0	0	1															InChI=1S/C20H12/c1-5-13-6-2-11-17-18-12-4-8-14-7-3-10-16(20(14)18)15(9-1)19(13)17/h1-12H
276.3	C22H12	Indeno(1,2,3-cd)pyrene	NMOC_p							0.0005	0.0022	0.0018				0.0004	0.0005	0	0	0	0	0	0	1	1	1	0	0	0	1	1															InChI=1S/C22H12/c1-2-7-17-16(6-1)18-11-10-14-9-8-13-4-3-5-15-12-19(17)22(18)21(14)20(13)15/h1-12H
276.3	C22H12	Benzo(ghi)perylene	NMOC_p					0.0002		0.0004	0.002	0.0027				0.0004	0.0005	0	0	0	0	1	0	1	1	1	0	0	0	1	1															InChI=1S/C22H12/c1-3-13-7-9-15-11-12-16-10-8-14-4-2-6-18-17(5-1)19(13)21(15)22(16)20(14)18/h1-12H
278.3	C22H14	Dibenz[a,h]anthracene	NMOC_p					0.0001		0.0003	0.0004	0.0005					0.0001	0	0	0	0	1	0	1	1	1	0	0	0	0	1															InChI=1S/C22H14/c1-3-7-19-15(5-1)9-11-17-14-22-18(13-21(17)19)12-10-16-6-2-4-8-20(16)22/h1-14H
278.3	C22H14	Picene	NMOC_p					0.0002		0.0001	0.001	0.0012					0.0001	0	0	0	0	1	0	1	1	1	0	0	0	0	1															InChI=1S/C22H14/c1-3-7-17-15(5-1)9-11-21-19(17)13-14-20-18-8-4-2-6-16(18)10-12-22(20)21/h1-14H
306.4	C24H18	Triphenylbenzene	NMOC_p														0.0002	0	0	0	0	0	0	0	0	0	0	0	0	0	1															InChI=1S/C24H18/c1-4-10-19(11-5-1)22-16-23(20-12-6-2-7-13-20)18-24(17-22)21-14-8-3-9-15-21/h1-18H
370.65	C27H46	17(H)-22,29,30-Trisnorhopane	NMOC_p					0.0043										0	0	0	0	1	0	0	0	0	0	0	0	0	0															C27H46_370.65
268.5	C19H40	Pristane	NMOC_p					0.0124			0.0001	0.0013				0.0011	0.0022	0	0	0	0	1	0	0	1	1	0	0	0	1	1															InChI=1S/C19H40/c1-16(2)10-7-12-18(5)14-9-15-19(6)13-8-11-17(3)4/h16-19H,7-15H2,1-6H3
254.5	C18H38	Norpristane	NMOC_p					0.0043				0.0004				0.0004	0.0012	0	0	0	0	1	0	0	0	1	0	0	0	1	1															InChI=1S/C18H38/c1-6-7-8-12-17(4)14-10-15-18(5)13-9-11-16(2)3/h16-18H,6-15H2,1-5H3
282.5	C20H42	Phytane	NMOC_p									0.0002				0.0001	0.0002	0	0	0	0	0	0	0	0	1	0	0	0	1	1															InChI=1S/C20H42/c1-7-18(4)12-9-14-20(6)16-10-15-19(5)13-8-11-17(2)3/h17-20H,7-16H2,1-6H3
422.8	C30H62	Squalane	NMOC_p					0.0162		0.0056		0.0014				0.0006	0.002	0	0	0	0	1	0	1	0	1	0	0	0	1	1															InChI=1S/C30H62/c1-25(2)15-11-19-29(7)23-13-21-27(5)17-9-10-18-28(6)22-14-24-30(8)20-12-16-26(3)4/h25-30H,9-24H2,1-8H3
254.5	C18H38	Octadecane	NMOC_p					0.0048				0.0004				0.0001	0.0019	0	0	0	0	1	0	0	0	1	0	0	0	1	1															InChI=1S/C18H38/c1-3-5-7-9-11-13-15-17-18-16-14-12-10-8-6-4-2/h3-18H2,1-2H3
268.5	C19H40	Nonadecane	NMOC_p					0.0136				0.0014				0.0014	0.0022	0	0	0	0	1	0	0	0	1	0	0	0	1	1															InChI=1S/C19H40/c1-3-5-7-9-11-13-15-17-19-18-16-14-12-10-8-6-4-2/h3-19H2,1-2H3
282.5	C20H42	Eicosane	NMOC_p					0.0273		0.0013	0.0002	0.0035				0.0026	0.0039	0	0	0	0	1	0	1	1	1	0	0	0	1	1															InChI=1S/C20H42/c1-3-5-7-9-11-13-15-17-19-20-18-16-14-12-10-8-6-4-2/h3-20H2,1-2H3
296.6	C21H44	Heneicosane	NMOC_p					0.0471		0.0035	0.0005	0.0039				0.0023	0.0039	0	0	0	0	1	0	1	1	1	0	0	0	1	1															InChI=1S/C21H44/c1-3-5-7-9-11-13-15-17-19-21-20-18-16-14-12-10-8-6-4-2/h3-21H2,1-2H3
310.6	C22H46	Docosane	NMOC_p					0.0533		0.0056	0.0002	0.0031				0.0013	0.0044	0	0	0	0	1	0	1	1	1	0	0	0	1	1															InChI=1S/C22H46/c1-3-5-7-9-11-13-15-17-19-21-22-20-18-16-14-12-10-8-6-4-2/h3-22H2,1-2H3
324.6	C23H48	Tricosane	NMOC_p					0.0595		0.0188	0.0004	0.0055				0.0046	0.0075	0	0	0	0	1	0	1	1	1	0	0	0	1	1															InChI=1S/C23H48/c1-3-5-7-9-11-13-15-17-19-21-23-22-20-18-16-14-12-10-8-6-4-2/h3-23H2,1-2H3
338.7	C24H50	Tetracosane	NMOC_p					0.0508		0.0216		0.0042				0.0013	0.0102	0	0	0	0	1	0	1	0	1	0	0	0	1	1															InChI=1S/C24H50/c1-3-5-7-9-11-13-15-17-19-21-23-24-22-20-18-16-14-12-10-8-6-4-2/h3-24H2,1-2H3
352.7	C25H52	Pentacosane	NMOC_p					0.067		0.0168		0.0045				0.0009	0.0081	0	0	0	0	1	0	1	0	1	0	0	0	1	1															InChI=1S/C25H52/c1-3-5-7-9-11-13-15-17-19-21-23-25-24-22-20-18-16-14-12-10-8-6-4-2/h3-25H2,1-2H3
366.7	C26H54	Hexacosane	NMOC_p					0.0508		0.012		0.0019					0.009	0	0	0	0	1	0	1	0	1	0	0	0	0	1															InChI=1S/C26H54/c1-3-5-7-9-11-13-15-17-19-21-23-25-26-24-22-20-18-16-14-12-10-8-6-4-2/h3-26H2,1-2H3
380.7	C27H56	Heptacosane	NMOC_p					0.0682		0.0269		0.007				0.0013	0.011	0	0	0	0	1	0	1	0	1	0	0	0	1	1															InChI=1S/C27H56/c1-3-5-7-9-11-13-15-17-19-21-23-25-27-26-24-22-20-18-16-14-12-10-8-6-4-2/h3-27H2,1-2H3
394.8	C28H58	Octacosane	NMOC_p					0.0595		0.0253	0.0005	0.0038					0.0062	0	0	0	0	1	0	1	1	1	0	0	0	0	1															InChI=1S/C28H58/c1-3-5-7-9-11-13-15-17-19-21-23-25-27-28-26-24-22-20-18-16-14-12-10-8-6-4-2/h3-28H2,1-2H3
408.8	C29H60	Nonacosane	NMOC_p					0.0806		0.0581	0.0011	0.0161				0.0126	0.0094	0	0	0	0	1	0	1	1	1	0	0	0	1	1															InChI=1S/C29H60/c1-3-5-7-9-11-13-15-17-19-21-23-25-27-29-28-26-24-22-20-18-16-14-12-10-8-6-4-2/h3-29H2,1-2H3
422.8	C30H62	Triacontane	NMOC_p					0.0583		0.0368	0.0005	0.0091					0.0078	0	0	0	0	1	0	1	1	1	0	0	0	0	1															InChI=1S/C30H62/c1-3-5-7-9-11-13-15-17-19-21-23-25-27-29-30-28-26-24-22-20-18-16-14-12-10-8-6-4-2/h3-30H2,1-2H3
436.8	C31H64	Hentriacontane	NMOC_p					0.0831		0.0872	0.0008	0.0185				0.0009	0.006	0	0	0	0	1	0	1	1	1	0	0	0	1	1															InChI=1S/C31H64/c1-3-5-7-9-11-13-15-17-19-21-23-25-27-29-31-30-28-26-24-22-20-18-16-14-12-10-8-6-4-2/h3-31H2,1-2H3
450.9	C32H66	Dotriacontane	NMOC_p					0.0376		0.0329	0.0005	0.005					0.0059	0	0	0	0	1	0	1	1	1	0	0	0	0	1															InChI=1S/C32H66/c1-3-5-7-9-11-13-15-17-19-21-23-25-27-29-31-32-30-28-26-24-22-20-18-16-14-12-10-8-6-4-2/h3-32H2,1-2H3
464.9	C33H68	Tritriacontane	NMOC_p					0.0351		0.0642	0.0007	0.0096				0.0007	0.0074	0	0	0	0	1	0	1	1	1	0	0	0	1	1															InChI=1S/C33H68/c1-3-5-7-9-11-13-15-17-19-21-23-25-27-29-31-33-32-30-28-26-24-22-20-18-16-14-12-10-8-6-4-2/h3-33H2,1-2H3
478.9	C34H70	Tetratriacontane	NMOC_p					0.0155		0.017	0.0013	0.0038				0.0014	0.0079	0	0	0	0	1	0	1	1	1	0	0	0	1	1															InChI=1S/C34H70/c1-3-5-7-9-11-13-15-17-19-21-23-25-27-29-31-33-34-32-30-28-26-24-22-20-18-16-14-12-10-8-6-4-2/h3-34H2,1-2H3
492.9	C35H72	Pentatriacontane	NMOC_p					0.0082		0.0138		0.0023					0.0066	0	0	0	0	1	0	1	0	1	0	0	0	0	1															InChI=1S/C35H72/c1-3-5-7-9-11-13-15-17-19-21-23-25-27-29-31-33-35-34-32-30-28-26-24-22-20-18-16-14-12-10-8-6-4-2/h3-35H2,1-2H3
162.14	C6H10O5	Levoglucosan	NMOC_p	3.2			4.14333	2.58255		0.4381	0.477	0.4331				1.82185	0.559	1	0	0	3	2	0	1	1	1	0	0	0	4	1				1.33031	2.84561								0.35851		InChI=1S/C6H10O5/c7-3-2-1-10-6(11-2)5(9)4(3)8/h2-9H,1H2/t2-,3-,4+,5-,6-/m1/s1
521	C37H76	Heptatriacontane	NMOC_p					0.0102										0	0	0	0	1	0	0	0	0	0	0	0	0	0															InChI=1S/C37H76/c1-3-5-7-9-11-13-15-17-19-21-23-25-27-29-31-33-35-37-36-34-32-30-28-26-24-22-20-18-16-14-12-10-8-6-4-2/h3-37H2,1-2H3
535	C38H78	Octriacontane	NMOC_p					0.031										0	0	0	0	1	0	0	0	0	0	0	0	0	0															InChI=1S/C38H78/c1-3-5-7-9-11-13-15-17-19-21-23-25-27-29-31-33-35-37-38-36-34-32-30-28-26-24-22-20-18-16-14-12-10-8-6-4-2/h3-38H2,1-2H3
549.1	C39H80	Nonatriacontane	NMOC_p					0.0122										0	0	0	0	1	0	0	0	0	0	0	0	0	0															InChI=1S/C39H80/c1-3-5-7-9-11-13-15-17-19-21-23-25-27-29-31-33-35-37-39-38-36-34-32-30-28-26-24-22-20-18-16-14-12-10-8-6-4-2/h3-39H2,1-2H3
162.14	C6H10O5	Mannosan	NMOC_p					0.29103										0	0	0	0	2	0	0	0	0	0	0	0	0	0					0.395315										InChI=1S/C6H10O5/c7-3-2-1-10-6(11-2)5(9)4(3)8/h2-9H,1H2/t2-,3-,4+,5+,6-/m1/s1
162.14	C6H10O5	Galactosan	NMOC_p					0.0017										0	0	0	0	1	0	0	0	0	0	0	0	0	0															InChI=1S/C6H10O5/c7-3-2-1-10-6(11-2)5(9)4(3)8/h2-9H,1H2/t2-,3+,4+,5-,6-/m1/s1
180.16	C6H12O6/C12H24O11	Galactose/Maltitol	NMOC_p					0.00845										0	0	0	0	1	0	0	0	0	0	0	0	0	0															InChI=1S/C6H12O6/c7-1-2-3(8)4(9)5(10)6(11)12-2/h2-11H,1H2/t2-,3+,4+,5-,6?/m1/s1
92.09	C3H8O3	Glycerol	NMOC_p					0.490767										0	0	0	0	1	0	0	0	0	0	0	0	0	0															InChI=1S/C3H8O3/c4-1-3(6)2-5/h3-6H,1-2H2
182.17	C6H14O6	Mannitol	NMOC_p					0.00865										0	0	0	0	1	0	0	0	0	0	0	0	0	0															InChI=1S/C6H14O6/c7-1-3(9)5(11)6(12)4(10)2-8/h3-12H,1-2H2/t3-,4-,5-,6-/m1/s1
182.17	C9H10O4	Syringaldehyde	NMOC_p					0.0115										0	0	0	0	1	0	0	0	0	0	0	0	0	0															InChI=1S/C9H10O4/c1-12-7-3-6(5-10)4-8(13-2)9(7)11/h3-5,11H,1-2H3
168.15	C8H8O4	Vanillic acid	NMOC_p					0.0459										0	0	0	0	1	0	0	0	0	0	0	0	0	0															InChI=1S/C8H8O4/c1-12-7-4-5(8(10)11)2-3-6(7)9/h2-4,9H,1H3,(H,10,11)
198.17	C9H10O5	Syringic acid	NMOC_p					0.021										0	0	0	0	1	0	0	0	0	0	0	0	0	0															InChI=1S/C9H10O5/c1-13-6-3-5(9(11)12)4-7(14-2)8(6)10/h3-4,10H,1-2H3,(H,11,12)
386.7	C27H46O	Cholesterol	NMOC_p							0.0068		0.0025					0.0011	0	0	0	0	0	0	1	0	1	0	0	0	0	1															InChI=1S/C27H46O/c1-18(2)7-6-8-19(3)23-11-12-24-22-10-9-20-17-21(28)13-15-26(20,4)25(22)14-16-27(23,24)5/h9,18-19,21-25,28H,6-8,10-17H2,1-5H3/t19-,21+,22+,23-,24+,25+,26+,27-/m1/s1
412.7	C29H48O	Stigmasterol	NMOC_p					0.0027		0.0107	0.0027	0.0062				0.0232	0.0009	0	0	0	0	1	0	1	1	1	0	0	0	1	1															InChI=1S/C29H48O/c1-7-21(19(2)3)9-8-20(4)25-12-13-26-24-11-10-22-18-23(30)14-16-28(22,5)27(24)15-17-29(25,26)6/h8-10,19-21,23-27,30H,7,11-18H2,1-6H3/b9-8+/t20-,21-,23+,24+,25-,26+,27+,28+,29-/m1/s1
414.7	C29H50O	b-Sitosterol	NMOC_p					0.0066		0.0221	0.0145	0.0095				0.0398	0.004	0	0	0	0	1	0	1	1	1	0	0	0	1	1															InChI=1S/C29H50O/c1-7-21(19(2)3)9-8-20(4)25-12-13-26-24-11-10-22-18-23(30)14-16-28(22,5)27(24)15-17-29(25,26)6/h10,19-21,23-27,30H,7-9,11-18H2,1-6H3/t20-,21-,23+,24+,25-,26+,27+,28+,29-/m1/s1
400.7	C28H48O	Campesterol	NMOC_p					0.0036		0.0133	0.0061	0.0074				0.0192	0.0009	0	0	0	0	1	0	1	1	1	0	0	0	1	1															InChI=1S/C28H48O/c1-18(2)19(3)7-8-20(4)24-11-12-25-23-10-9-21-17-22(29)13-15-27(21,5)26(23)14-16-28(24,25)6/h9,18-20,22-26,29H,7-8,10-17H2,1-6H3/t19-,20-,22+,23+,24-,25+,26+,27+,28-/m1/s1
388.67	C27H48O	Cholestanol and coprostanol	NMOC_p							0.0094		0.0019						0	0	0	0	0	0	1	0	1	0	0	0	0	0															C27H48O_388.67
416.7	C29H52O	Stigmastanol	NMOC_p							0.02	0.0013	0.005					0.0002	0	0	0	0	0	0	1	1	1	0	0	0	0	1															InChI=1S/C29H52O/c1-7-21(19(2)3)9-8-20(4)25-12-13-26-24-11-10-22-18-23(30)14-16-28(22,5)27(24)15-17-29(25,26)6/h19-27,30H,7-18H2,1-6H3/t20-,21-,22+,23+,24+,25-,26+,27+,28+,29-/m1/s1
370.65	C27H46	17(H)-22,29,30-Trisnorhopane	NMOC_p														0.0001	0	0	0	0	0	0	0	0	0	0	0	0	0	1															CAS53584-59-1
398.71	C29H50	17(H)-21(H)-30-Norhopane	NMOC_p					0.0105									0.0002	0	0	0	0	1	0	0	0	0	0	0	0	0	1															InChI=1S/C29H50/c1-8-20-12-17-26(4)21(20)13-18-28(6)23(26)10-11-24-27(5)16-9-15-25(2,3)22(27)14-19-29(24,28)7/h20-24H,8-19H2,1-7H3/t20-,21+,22+,23-,24-,26+,27+,28-,29-/m1/s1
412.73	C30H52	17(H)-21(H)-Hopane	NMOC_p					0.0027									0.0003	0	0	0	0	1	0	0	0	0	0	0	0	0	1															InChI=1S/C30H52/c1-20(2)21-12-17-27(5)22(21)13-18-29(7)24(27)10-11-25-28(6)16-9-15-26(3,4)23(28)14-19-30(25,29)8/h20-25H,9-19H2,1-8H3/t21-,22-,23+,24-,25-,27+,28+,29-,30-/m1/s1
		EF B abs 870 (m2 kg 1)	PM optical property				3.2979	0.0192	1.73445	0.5637	1.02242	0.58266				2.04795	28.6	0	0	0	1	2	1	2	8	10	0	0	0	2	1					0.00975807		0.143543	1.04831	0.656184				2.67704		Babs_870
		EF B scat 870 (m 2 kg 1)	PM optical property				20.1997	10.7208	0.7024	2.5828	0.756413	3.39147				18.2183	14.1	0	0	0	1	2	1	2	8	10	0	0	0	2	1					10.7186		2.06136	0.591292	3.50251				21.001		Bscat_870
		EF Babs 405 (m2 kg1)	PM optical property					1.35		4.7381	4.79883	5.18329		0.3618		19.1732	24.83	0	0	0	0	1	0	2	8	9	0	1	0	1	1							3.60172	5.16925	3.40606						Babs_405
		EF B 405 (m2 kg1scat )	PM optical property					50.6										0	0	0	0	1	0	0	0	0	0	0	0	0	0															B_405
		EF Babs 405 just BrC (m2 kg1)	PM optical property					1.3										0	0	0	0	1	0	0	0	0	0	0	0	0	0															Babs_405_Br
		EF Babs 405 just BC (m2 kg1)	PM optical property					0.054		1.21095	2.19631	1.37557				8.4656		0	0	0	0	1	0	2	8	9	0	0	0	1	0							0.308369	2.25191	1.43616						Babs_405_BC
		SSA 870 nm	PM optical property				0.717514	0.99705	0.2915	0.7837	0.5492	0.8058				0.8869	0.329	0	0	0	1	2	1	2	8	10	0	0	0	2	1					0.0013435		0.105925	0.25213	0.14299				0.0977222		SSA_870
		SSA 405 nm	PM optical property	0.5375	0.858		0.68294	0.948	0.6412	0.8435	0.648725	0.857711		0.8243		0.8085	0.7148	2	1	0	3	4	3	2	8	9	0	1	0	7	1	0.123744			0.280506	0.0177576	0.0132408	0.0446891	0.175671	0.0755908				0.0486818		SSA_405
		AAE	PM optical property	1.6875	2.81		2.36035	6.3255	2.09274	2.58275	1.75582	2.95448				3.31153	0.971	2	1	0	3	4	3	2	8	9	0	0	0	7	1	0.56215			1.31035	0.991656	0.199263	0.774211	0.806747	1.09657				0.78499		AAE
		SSA 532	PM optical property	0.4925	0.923		0.652	0.991333	0.6875							0.894667		2	1	0	2	3	2	0	0	0	0	0	0	6	0	0.243952			0.384666	0.00152753	0.0106066							0.0380088		SSA_532
		SSA 660	PM optical property	0.4675	0.908		0.6335	0.992667	0.655							0.91		2	1	0	2	3	2	0	0	0	0	0	0	6	0	0.293449			0.40093	0.00152753	0.0424264							0.0326129		SSA_660
		XS_401/XS_870	PM optical property				38.8651		5.33502									0	0	0	1	0	1	0	0	0	0	0	0	0	0															XS_401/XS_870
		EFabs401	PM optical property				11.9598		9.2897									0	0	0	1	0	1	0	0	0	0	0	0	0	0															Babs_401
		EFabs401 (BrC)	PM optical property				7.86966		5.38495									0	0	0	1	0	1	0	0	0	0	0	0	0	0															Babs_401_BrC
		EFscat401	PM optical property				84.2352		16.8635									0	0	0	1	0	1	0	0	0	0	0	0	0	0															Bscat_401
		BrC	PM optical property							3.59905	3.04207	3.88544		0.1441		10.9261		0	0	0	0	0	0	2	7	9	0	1	0	1	0							3.36052	4.45956	2.62863						BrC
		EF Bscat 405 (m2/kg)	PM optical property							30.2495	12.3406	41.7973		1.697		116.32	86.4	0	0	0	0	0	0	2	8	9	0	1	0	1	1							29.404	19.6154	39.121						Bscat_405
		EF Babs 405 just BrC (m2/kg)	PM optical property							3.5271	2.97494	3.80772				10.7076		0	0	0	0	0	0	2	7	9	0	0	0	1	0							3.29328	4.35475	2.57605						Babs_405_BrC
