# Supplementary material for: NEIVAv1.0: Next-generation Emissions InVentory expansion of Akagi et al. (2011) version 1.0
Source: Copernicus journal article supplement (doi:10.5194/gmd-17-7679-2024), 2024-11-04
Supplement: Supplementary file 1 [file gmd-17-7679-2024-supplement.zip]

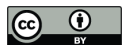

## *Supplement of*

# **NEIVAv1.0: Next-generation Emissions InVentory expansion of Akagi et al. (2011) version 1.0**

**Samiha Binte Shahid et al.**

*Correspondence to:* Kelley C. Barsanti ([barsanti@ucar.edu](mailto:barsanti@ucar.edu))

- [gmd-17-7679-2024-supplement-title-page.pdf](#)
- [NEIVA\\_GMD\\_Revised\\_SI\\_Final.pdf](#)
- [Recommended\\_EF.xlsx](#)
- [Recommended\\_ER.xlsx](#)

The copyright of individual parts of the supplement might differ from the article licence.
